# Supplementary material
Source: publisher figshare collection journal article supplement (https://gsajournals.figshare.com/ndownloader/files/14690633)
Supplement: Supplementary file 1 [file 14690633]

## Sheet: Sheet1
line	Plate_Name	Well	pop	PZA03577-1	PZA00060-2	PZA02519-7	PZA02969-9	PHM4185-13	PHM5480-17	PHM5805-19	PHM14618-11	PHM4757-14	PHM13420-11	PZA01926-1	PHM9635-30	PZA02209-2	PZA00667-1	PHM4677-11	PHM13360-13	PHM4586-12	PHM14412-4	PHM9914-11	PHM3457-6	PHM4880-179	PZA00637-4	PZA00379-2	PHM1745-16	PZA01886-1	PHM4495-14	PZA00485-2	PZA00492-26	PHM4720-12
DRIL32.090	Plate_08	B08	DRIL32.090	0	0	2	0	0	0	0	0	2	0	2	0	0	0	0	0	0	0	0	2	2	2	1	0	0	0	2	0	0
DRIL32.095	Plate_01	F10	DRIL32.095	0	0	0	0	0		0	0	0	0	0	0	0	0	0	0	0	0	0	0		0	0	1	2	0	0	0	0
DRIL32.134	Plate_010	F01	DRIL32.134	0	0	0	0	2	0	0	0	2	0	0	0	0	0	0	0	0	0	0	2	2	0	2	0	0	0	2	0	0
DRIL32.191	Plate_05	G03	DRIL32.191	0	0	0	0	0	0	0	0	0	0	0	0	0	0	0	0	0	2	0	0		0	0	0	2	0	0	0	0
DRIL52.055	Plate_010	H07	DRIL52.055	2	2	2	2	0	0	0	0	0	2	0	0	0	0	0	0	0	0	0	0		0	0	0	0	0	0	0	2
DRIL52.157	Plate_06	C02	DRIL52.157	0	0	0	0	2	2		0	1	0	0	0	0	0	1	0	0	0	0	0		0	0	0	0	0	0	0	0
DRIL52.268	Plate_09	A07	DRIL52.268	2	0	0	0	0	0		2	2	0	0	0	0	0	2	0	1	0	0	0		0	0	0	0	0	0	0	0
DRIL62.030	Plate_04	A06	DRIL62.030	0	0	0	0	0	0	0	0	0	2	0	0	0	0	0	0	0	0	0	0		0	0	0	0	2	0	0	0
DRIL62.078	Plate_07	C04	DRIL62.078	0	0	0	0	0	0	0	0	0	0	2	2	2	0	0	0	0	0	0	0		0	0	0	0	0	0	2	0
DRIL62.156	Plate_05	H11	DRIL62.156	0	0	0	0	0	2	0	0	2	2	0	0	0	2	2	0	0	0	0	0		0	0	0	0	0	0	0	0
DRIL72.040	Plate_01	D08	DRIL72.040	0	0	0	0	0	0	0	0	0	0	0	0	0	0	0	1	0	0	0	0		0	0	0	0	0	0	0	0
DRIL72.061	Plate_02	H08	DRIL72.061	0	0	0	0	0		0	0	0	0	0	0	0	1	0	0	1	1	1	0		0	0	0	0	0	0	0	0
DRIL72.232	Plate_04	D02	DRIL72.232	0	0	0	0	0		0	0	2	0	0	0	0	0	0		2	0	0	0		0	0	0	0	0	0	0	0
H100	Plate_010	F05	H100	0	0	0	0	0	0	0	0	0	0	0	0	0	0	0	0	0	0	0	0		0	0	0	0	0	0	0	0
H100_DRIL32.090F2_1	Plate_08	F04	H100_DRIL32.090	0	0	0	0	0		0	0	1	0	0	0	0	0	0	0	0	0	0	1	2	0	0	0	0	0	1	0	0
H100_DRIL32.090F2_10	Plate_08	H06	H100_DRIL32.090	0	0	1	0	0	0	0	0	2	0	1	0	0	0	0	0	0	0	0	1	2	1	0	0	0	0	1	0	0
H100_DRIL32.090F2_11	Plate_08	F07	H100_DRIL32.090	0	0	2	0	0	0	0	0	0	0	2	0	0	0	0	0	0	0	0	1	2	1	0	0	0	0	1	0	0
H100_DRIL32.090F2_12	Plate_08	D06	H100_DRIL32.090	0	0	1	0	0	0	0	0	1	0	2	0	0	0	0	0	0	0	0	2	2	1	0	0	0	0	2	0	0
H100_DRIL32.090F2_13	Plate_08	D04	H100_DRIL32.090	0	0	1	0	0	0	0	0	1	0	1	0	0	0	0	0	0	0	0	1		1	0	0	0	0	1	0	0
H100_DRIL32.090F2_14	Plate_08	D05	H100_DRIL32.090	0	0	2	0	0	0	0	0	0	0	0	0	0	0	0	0	0	0	0	0		0	0	0	0	0	0	0	0
H100_DRIL32.090F2_15	Plate_08	H05	H100_DRIL32.090	0	0	1	0	0	0	0	0	1	0	1	0	0	0	0	0	0	0	0	2	2	1	0	0	0	0	1	0	0
H100_DRIL32.090F2_16	Plate_08	F08	H100_DRIL32.090	0	0	0	0	0	0	0	0	2	0	0	0	0	0	0	0	0	0	0	1	2	1	0	0	0	0	1	0	0
H100_DRIL32.090F2_17	Plate_08	C03	H100_DRIL32.090	0	0	1	0	0	0	0	0	2	0	1	0	0	0	0	0	0	0	0	1	2	1	0	0	0	0	1	0	0
H100_DRIL32.090F2_18	Plate_08	E09	H100_DRIL32.090	0	0	0	0	0	0	0	0	1	0	1	0	0	0	0	0	0	0	0	1		1	0	0	0	0	1	0	0
H100_DRIL32.090F2_19	Plate_08	G06	H100_DRIL32.090	0	0	2	0	0	0	0	0	1	0	1	0	0	0	0	0	0	0	0	1	2	1	0	0	0	0	1	0	0
H100_DRIL32.090F2_2	Plate_08	H04	H100_DRIL32.090	0	0	2	0	0	0	0	0	2	0	2	0	0	0	0	0	0	0	0	1	2	0	2	0	0	0	1	0	0
H100_DRIL32.090F2_20	Plate_08	A09	H100_DRIL32.090	0	0	2	0	0	0	0	0	0	0	1	0	0	0	0	0	0	0	0	2	2	2	0	0	0	0	2	0	0
H100_DRIL32.090F2_21	Plate_08	G05	H100_DRIL32.090	0	0	1	0	0		0	0	1	0	0	0	0	0	0	0	0	0	0	0		0	0	0	0	0	0	0	0
H100_DRIL32.090F2_22	Plate_08	E07	H100_DRIL32.090	0	0	1	0	0	1	0	0	1	0	0	0	0	0	0	0	0	0	0	1	2	1	0	0	0	0	1	0	0
H100_DRIL32.090F2_23	Plate_08	A04	H100_DRIL32.090	0	0	0	0	0		0	0	1	0	1	0	0	0	0	0	0	0	0	1		0	0	0	0	0	1	0	0
H100_DRIL32.090F2_24	Plate_08	F01	H100_DRIL32.090	0	0	1	0	0		0	0	0	0	0	0	0	0	0	0	0	0	0	2		1	1	0	0	0	2	0	0
H100_DRIL32.090F2_25	Plate_08	E08	H100_DRIL32.090	0	0	1	0	0		0	0	1	0	0	0	0	0	0	0	0	0	0	2	2	2	0	0	0	0	2	0	0
H100_DRIL32.090F2_26	Plate_08	B05	H100_DRIL32.090	0	0	1	0	0		0	0	1	0	1	0	0	0	0	0	0	0	0	0		0	0	0	0	0	0	0	0
H100_DRIL32.090F2_27	Plate_08	H07	H100_DRIL32.090	0	0	1	0	0		0	0	1	0	1	0	0	0	0	0	0	0	0	1	2	1	0	0	0	0	1	0	0
H100_DRIL32.090F2_28	Plate_08	E02	H100_DRIL32.090	0	0	1	0	0		0	0	1	0	0	0	0	0	0	0	0	0	0	1		1	1	0	0	0	1	0	0
H100_DRIL32.090F2_29	Plate_08	F05	H100_DRIL32.090	0	0	1	0	0	0	0	0	1	0	0	0	0	0	0	0	0	0	0	0		1	0	0	0	0	0	0	0
H100_DRIL32.090F2_3	Plate_08	F06	H100_DRIL32.090	0	0	0	0	0	0	0	0	1	0	2	0	0	0	0	0	0	0	0	1	2	1	0	0	0	0	1	0	0
H100_DRIL32.090F2_30	Plate_08	C08	H100_DRIL32.090	0	0	1	0	0		0	0	2	0	1	0	0	0	0	0	0	0	0	1	2	0	2	0	0	0	1	0	0
H100_DRIL32.090F2_31	Plate_08	C02	H100_DRIL32.090	0	0	0	0	0	0	0	0	1	0	0	0	0	0	0	0	0	0	0	0		0	1	0	0	0	0	0	0
H100_DRIL32.090F2_32	Plate_08	B02	H100_DRIL32.090	0	0	1	0	0	0	0	0	2	0	1	0	0	0	0	0	0	0	0	1	2	1	2	0	0	0	1	0	0
H100_DRIL32.090F2_33	Plate_08	H01	H100_DRIL32.090	0	0	1	0	0	0	0	0	1	0	1	0	0	0	0	0	0	0	0	1	2	1	1	0	0	0	1	0	0
H100_DRIL32.090F2_34	Plate_08	A08	H100_DRIL32.090	0	0	2	0	0	0	0	0	0	0	1	0	0	0	0	0	0	0	0	1	2	1	0	0	0	0	1	0	0
H100_DRIL32.090F2_35	Plate_08	C09	H100_DRIL32.090	0	0	1	0	0		0	0	2	0	0	0	0	0	0	0	0	0	0	1	2	1	1	0	0	0	1	0	0
H100_DRIL32.090F2_36	Plate_08	A10	H100_DRIL32.090	0	0	1	0	0	0	0	0	1	0	2	0	0	0	0	0	0	0	0	2	2	2	1	0	0	0	2	0	0
H100_DRIL32.090F2_37	Plate_08	D02	H100_DRIL32.090	0	0	1	0	0		0	0	1	0	2	0	0	0	0	0	0	0	0	1	2	0	0	0	0	0	1	0	0
H100_DRIL32.090F2_38	Plate_08	D08	H100_DRIL32.090	0	0	1	0	0	0	0	0	1	0	0	0	0	0	0	0	0	0	0	2	2	2	2	0	0	0	2	0	0
H100_DRIL32.090F2_39	Plate_08	D09	H100_DRIL32.090	0	0	1	0	0		0	0	1	0	1	0	0	0	0	0	0	0	0	2	2	0	1	0	0	0	2	0	0
H100_DRIL32.090F2_4	Plate_08	B04	H100_DRIL32.090	0	0	0	0	0		0	0	2	0	1	0	0	0	0	0	0	0	0	0		0	0	0	0	0	0	0	0
H100_DRIL32.090F2_40	Plate_08	D07	H100_DRIL32.090	0	0	1	0	0	0	0	0	2	0	2	0	0	0	0	0	0	0	0	0		0	0	0	0	0	0	0	0
H100_DRIL32.090F2_41	Plate_08	A06	H100_DRIL32.090	0	0	2	0	0	0	0	0	1	0	1	0	0	0	0	0	0	0	0	1	2	1	0	0	0	0	1	0	0
H100_DRIL32.090F2_42	Plate_08	F02	H100_DRIL32.090	0	0	0	0	0	0	0	0	1	0	1	0	0	0	0	0	0	0	0	1		1	0	0	0	0	0	0	0
H100_DRIL32.090F2_43	Plate_08	G04	H100_DRIL32.090	0	0	2	0	0		0	0	0	0	0	0	0	0	0	0	0	0	0	0		0	0	0	0	0	0	0	0
H100_DRIL32.090F2_44	Plate_08	B09	H100_DRIL32.090	0	0	2	0	0	0	0	0	1	0	2	0	0	0	0	0	0	0	0	1	2	1	1	0	0	0	1	0	0
H100_DRIL32.090F2_45	Plate_08	C07	H100_DRIL32.090	0	0	2	0	0	0	0	0	1	0	2	0	0	0	0	0	0	0	0	0		1	0	0	0	0	0	0	0
H100_DRIL32.090F2_46	Plate_08	E03	H100_DRIL32.090	0	0	1	0	0	0	0	0	2	0	0	0	0	0	0	0	0	0	0	1		1	0	0	0	0	0	0	0
H100_DRIL32.090F2_47	Plate_08	D03	H100_DRIL32.090	0	0	1	0	0	0	0	0	1	0	1	0	0	0	0	0	0	0	0	0	2	1	0	0	0	0	1	0	0
H100_DRIL32.090F2_48	Plate_08	B06	H100_DRIL32.090	0	0	1	0	0	0	0	0	2	0	1	0	0	0	0	0	0	0	0	2	2	2	2	0	0	0	2	0	0
H100_DRIL32.090F2_49	Plate_08	A02	H100_DRIL32.090	0	0	1	0	0	0	0	0	2	0	2	0	0	0	0	0	0	0	0	2	2	2	2	0	0	0	2	0	0
H100_DRIL32.090F2_5	Plate_08	C05	H100_DRIL32.090	0	0	1	0	0	0	0	0	1	0	0	0	0	0	0	0	0	0	0	2	2	1	0	0	0	0	2	0	0
H100_DRIL32.090F2_50	Plate_08	H09	H100_DRIL32.090	0	0	1	0	0	1	0	0	1	0	1	0	0	0	0	0	0	0	0	2	2	2	1	0	0	0	2	0	0
H100_DRIL32.090F2_51	Plate_08	G07	H100_DRIL32.090	0	0	1	0	0		0	0	2	0	1	0	0	0	0	0	0	0	0	1	2	1	0	0	0	0	1	0	0
H100_DRIL32.090F2_52	Plate_08	H03	H100_DRIL32.090	0	0	1	0	0	0	0	0	1	0	1	0	0	0	0	0	0	0	0	2	2	1	0	0	0	0	2	0	0
H100_DRIL32.090F2_53	Plate_08	G09	H100_DRIL32.090	1	1	1	0	1	2	0	1	1	1	1	0	1	1	1	0	1	0	0	2	2	1	1	1	0	1	2	0	1
H100_DRIL32.090F2_54	Plate_08	H08	H100_DRIL32.090	0	0	1	0	0		0	0	1	0	1	0	0	0	0	0	0	0	0	0		0	0	0	0	0	0	0	0
H100_DRIL32.090F2_55	Plate_08	D10	H100_DRIL32.090	0	0	1	0	0	0	0	0	1	0	2	0	0	0	0	0	0	0	0	0		1	0	0	0	0	0	0	0
H100_DRIL32.090F2_56	Plate_08	G08	H100_DRIL32.090	0	0	0	0	0	0	0	0	0	0	1	0	0	0	0	0	0	0	0	1	2	2	1	0	0	0	1	0	0
H100_DRIL32.090F2_57	Plate_08	B10	H100_DRIL32.090	0	0	2	0	0	0	0	0	0	0	1	0	0	0	0	0	0	0	0	1	2	1	0	0	0	0	1	0	0
H100_DRIL32.090F2_58	Plate_08	C04	H100_DRIL32.090	0	0	0	0	0		0	0	1	0	1	0	0	0	0	0	0	0	0	2	2	1	0	0	0	0	2	0	0
H100_DRIL32.090F2_59	Plate_08	G03	H100_DRIL32.090	0	0	2	0	0	0	0	0	1	0	2	0	0	0	0	0	0	0	0	2	2	2	0	0	0	0	2	0	0
H100_DRIL32.090F2_6	Plate_08	B07	H100_DRIL32.090	0	0	1	0	0	0	0	0	1	0	2	0	0	0	0	0	0	0	0	1	2	1	0	0	0	0	1	0	0
H100_DRIL32.090F2_60	Plate_08	C06	H100_DRIL32.090	0	0	1	0	0		0	0	1	0	1	0	0	0	0	0	0	0	0	1	2	1	1	0	0	0	1	0	0
H100_DRIL32.090F2_61	Plate_08	G02	H100_DRIL32.090	0	0	0	0	0	0	0	0	0	0	1	0	0	0	0	0	0	0	0	0		0	0	0	0	0	0	0	0
H100_DRIL32.090F2_62	Plate_08	A05	H100_DRIL32.090	0	0	1	0	0	0	0	0	1	0	0	0	0	0	0	0	0	0	0	0		1	0	0	0	0	0	0	0
H100_DRIL32.090F2_63	Plate_08	F03	H100_DRIL32.090	0	0	2	0	0	0	0	0	1	0	1	0	0	0	0	0	0	0	0	0		0	0	0	0	0	0	0	0
H100_DRIL32.090F2_64	Plate_08	A03	H100_DRIL32.090	0	0	2	0	0	0	0	0	1	0	2	0	0	0	0	0	0	0	0	1		1	1	0	0	0	1	0	0
H100_DRIL32.090F2_65	Plate_08	E06	H100_DRIL32.090	0	0	2	0	0	0	0	0	1	0	2	0	0	0	0	0	0	0	0	1	2	1	0	0	0	0	1	0	0
H100_DRIL32.090F2_66	Plate_08	C10	H100_DRIL32.090	0	0	1	0	0	0	0	0	1	0	1	0	0	0	0	0	0	0	0	1	2	1	0	0	0	0	1	0	0
H100_DRIL32.090F2_67	Plate_08	H02	H100_DRIL32.090	0	0	1	0	0	0	0	0	0	0	0	0	0	0	0	0	0	0	0	1	2	1	1	0	0	0	1	0	0
H100_DRIL32.090F2_68	Plate_08	E04	H100_DRIL32.090	0	0	1	0	0	0	0	0	0	0	1	0	0	0	0	0	0	0	0	1	2	2	0	0	0	0	1	0	0
H100_DRIL32.090F2_69	Plate_08	F09	H100_DRIL32.090	0	0	0	0	0	0	0	0	1	0	0	0	0	0	0	0	0	0	0	0		0	0	0	0	0	0	0	0
H100_DRIL32.090F2_7	Plate_08	G01	H100_DRIL32.090	0	0	0	0	0	0	0	0	0	0	1	0	0	0	0	0	0	0	0	0		0	0	0	0	0	0	0	0
H100_DRIL32.090F2_70	Plate_08	E05	H100_DRIL32.090	0	0	1	0	0	0	0	0	0	0	0	0	0	0	0	0	0	0	0	1		0	0	0	0	0	0	0	0
H100_DRIL32.090F2_8	Plate_08	A07	H100_DRIL32.090	0	0	1	0	0	0	0	0	2	0	0	0	0	0	0	0	0	0	0	2	2	2	0	0	0	0	2	0	0
H100_DRIL32.090F2_9	Plate_08	B03	H100_DRIL32.090	0	0	0	0	0	0	0	0	0	0	0	0	0	0	0	0	0	0	0	1	2	1	0	0	0	0	1	0	0
H100_DRIL32.095F2_1	Plate_01	B12	H100_DRIL32.095	0	0	0	0	0	0	0	0	0	0	0	0	0	0	0	0	0	0	0	0		0	0	1	1	0	0	0	0
H100_DRIL32.095F2_10	Plate_02	H07	H100_DRIL32.095	0	0	0	0	0		0	0	0	0	0	0	0	0	0	0	0	0	0	0		0	0	1	1	0	0	0	0
H100_DRIL32.095F2_11	Plate_02	G03	H100_DRIL32.095	0	0	0	0	0		0	0	0	0	0	0	0	0	0	0	0	0	0	0		0	0	0	1	0	0	0	0
H100_DRIL32.095F2_12	Plate_02	C04	H100_DRIL32.095	0	0	0	0	0		0	0	0	0	0	0	0	0	0	0	0	0	0	0		0	0	0	1	0	0	0	0
H100_DRIL32.095F2_13	Plate_01	C12	H100_DRIL32.095	0	0	0	0	0	0	0	0	0	0	0	0	0	0	0	0	0	0	0	0		0	0	0	1	0	0	0	0
H100_DRIL32.095F2_14	Plate_02	H03	H100_DRIL32.095	0	0	0	0	0	0	0	0	0	0	0	0	0	0	0	0	0	0	0	0		0	0	1	1	0	0	0	0
H100_DRIL32.095F2_15	Plate_02	D02	H100_DRIL32.095	0	0	0	0	0		0	0	0	0	0	0	0	0	0	0	0	0	0	0		0	0	0	0	0	0	0	0
H100_DRIL32.095F2_16	Plate_01	D10	H100_DRIL32.095	0	0	0	0	0	0	0	0	0	0	0	0	0	0	0	0	0	0	0	0		0	0	1	1	0	0	0	0
H100_DRIL32.095F2_17	Plate_02	E01	H100_DRIL32.095	0	0	0	0	0	0	0	0	0	0	0	0	0	0	0	0	0	0	0	0		0	0	1	2	0	0	0	0
H100_DRIL32.095F2_18	Plate_01	A12	H100_DRIL32.095	0	0	0	0	0	0	0	0	0	0	0	0	0	0	0	0	0	0	0	0		0	0	2	1	0	0	0	0
H100_DRIL32.095F2_19	Plate_01	A11	H100_DRIL32.095	0	0	0	0	0	0	0	0	0	0	0	0	0	0	0	0	0	0	0	0		0	0	1	0	0	0	0	0
H100_DRIL32.095F2_2	Plate_02	E07	H100_DRIL32.095	0	0	0	0	0	0	0	0	0	0	0	0	0	0	0	0	0	0	0	0		0	0	0	1	0	0	0	0
H100_DRIL32.095F2_20	Plate_01	C11	H100_DRIL32.095	0	0	0	0	0	0	0	0	0	0	0	0	0	0	0	0	0	0	0	0		0	0	1	1	0	0	0	0
H100_DRIL32.095F2_21	Plate_01	E09	H100_DRIL32.095	0	0	0	0	0		0	0	0	0	0	0	0	0	0	0	0	0	0	0		0	0	1	0	0	0	0	0
H100_DRIL32.095F2_22	Plate_02	G02	H100_DRIL32.095	0	0	0	0	0		0	0	0	0	0	0	0	0	0	0	0	0	0	0		0	0	2	0	0	0	0	0
H100_DRIL32.095F2_23	Plate_01	B10	H100_DRIL32.095	0	0	0	0	0	0	0	0	0	0	0	0	0	0	0	0	0	0	0	0		0	0	1	1	0	0	0	0
H100_DRIL32.095F2_24	Plate_02	G07	H100_DRIL32.095	0	0	0	0	0	0	0	0	0	0	0	0	0	0	0	0	0	0	0	0		0	0	1	1	0	0	0	0
H100_DRIL32.095F2_25	Plate_01	G09	H100_DRIL32.095	0	0	0	0	0		0	0	0	0	0	0	0	0	0	0	0	0	0	0		0	0	1	2	0	0	0	0
H100_DRIL32.095F2_26	Plate_02	C06	H100_DRIL32.095	0	0	0	0	0		0	0	0	0	0	0	0	0	0	0	0	0	0	0		0	0	1	1	0	0	0	0
H100_DRIL32.095F2_27	Plate_02	F03	H100_DRIL32.095	0	0	0	0	0		0	0	0	0	0	0	0	0	0	0	0	0	0	0		0	0	1	1	0	0	0	0
H100_DRIL32.095F2_28	Plate_02	D05	H100_DRIL32.095	0	0	0	0	0	0	0	0	0	0	0	0	0	0	0	0	0	0	0	0		0	0	2	1	0	0	0	0
H100_DRIL32.095F2_29	Plate_02	F01	H100_DRIL32.095	0	0	0	0	0	0	0	0	0	0	0	0	0	0	0	0	0	0	0	0		0	0	1	2	0	0	0	0
H100_DRIL32.095F2_3	Plate_02	C03	H100_DRIL32.095	0	0	0	0	0		0	0	0	0	0	0	0	0	0	0	0	0	0	0		0	0	1	1	0	0	0	0
H100_DRIL32.095F2_30	Plate_02	H04	H100_DRIL32.095	0	0	0	0	0		0	0	0	0	0	0	0	0	0	0	0	0	0	0		0	0	1	0	0	0	0	0
H100_DRIL32.095F2_31	Plate_01	F09	H100_DRIL32.095	0	0	0	0	0		0	0	0	0	0	0	0	0	0	0	0	0	0	0		0	0	1	2	0	0	0	0
H100_DRIL32.095F2_32	Plate_01	B11	H100_DRIL32.095	0	0	0	0	0	0	0	0	0	0	0	0	0	0	0	0	0	0	0	0		0	0	2	2	0	0	0	0
H100_DRIL32.095F2_33	Plate_02	C05	H100_DRIL32.095	0	0	0	0	0		0	0	0	0	0	0	0	0	0	0	0	0	0	0		0	0	0	1	0	0	0	0
H100_DRIL32.095F2_34	Plate_02	B07	H100_DRIL32.095	0	0	0	0	0		0	0	0	0	0	0	0	0	0	0	0	0	0	0		0	0	1	2	0	0	0	0
H100_DRIL32.095F2_35	Plate_02	F06	H100_DRIL32.095	0	0	0	0	0	0	0	0	0	0	0	0	0	0	0	0	0	0	0	0		0	0	2	2	0	0	0	0
H100_DRIL32.095F2_36	Plate_01	B09	H100_DRIL32.095	0	0	0	0	0	0	0	0	0	0	0	0	0	0	0	0	0	0	0	0		0	0	1	1	0	0	0	0
H100_DRIL32.095F2_37	Plate_01	D09	H100_DRIL32.095	0	0	0	0	0	0	0	0	0	0	0	0	0	0	0	0	0	0	0	0		0	0	1	1	0	0	0	0
H100_DRIL32.095F2_38	Plate_01	H11	H100_DRIL32.095	0	0	0	0	0	1	0	0	0	0	0	0	0	0	0	0	0	0	0	0		0	0	1	0	0	0	0	0
H100_DRIL32.095F2_39	Plate_01	C10	H100_DRIL32.095	0	0	0	0	0	0	0	0	0	0	0	0	0	0	0	0	0	0	0	0		0	0	0	1	0	0	0	0
H100_DRIL32.095F2_4	Plate_02	D04	H100_DRIL32.095	0	0	0	0	0	0	0	0	0	0	0	0	0	0	0	0	0	0	0	0		0	0	1	1	0	0	0	0
H100_DRIL32.095F2_40	Plate_01	F12	H100_DRIL32.095	0	0	0	0	0	0	0	0	0	0	0	0	0	0	0	0	0	0	0	0		0	0	1	1	0	0	0	0
H100_DRIL32.095F2_41	Plate_02	A07	H100_DRIL32.095	0	0	0	0	0	0	0	0	0	0	0	0	0	0	0	0	0	0	0	0		0	0	2	2	0	0	0	0
H100_DRIL32.095F2_42	Plate_01	F11	H100_DRIL32.095	0	0	0	0	0	0	0	0	0	0	0	0	0	0	0	0	0	0	0	0		0	0	1	2	0	0	0	0
H100_DRIL32.095F2_43	Plate_02	G06	H100_DRIL32.095	0	0	0	0	0		0	0	0	0	0	0	0	0	0	0	0	0	0	0		0	0	0	0	0	0	0	0
H100_DRIL32.095F2_44	Plate_02	E05	H100_DRIL32.095	0	0	0	0	0	0	0	0	0	0	0	0	0	0	0	0	0	0	0	0		0	0	2	1	0	0	0	0
H100_DRIL32.095F2_45	Plate_02	C07	H100_DRIL32.095	0	0	0	0	0	0	0	0	0	0	0	0	0	0	0	0	0	0	0	0		0	0	1	1	0	0	0	0
H100_DRIL32.095F2_46	Plate_02	F05	H100_DRIL32.095	0	0	0	0	0	0	0	0	0	0	0	0	0	0	0	0	0	0	0	0		0	0	1	0	0	0	0	0
H100_DRIL32.095F2_47	Plate_02	D03	H100_DRIL32.095	0	0	0	0	0		0	0	0	0	0	0	0	0	0	0	0	0	0	0		0	0	0	1	0	0	0	0
H100_DRIL32.095F2_48	Plate_01	A10	H100_DRIL32.095	0	0	0	0	0	0	0	0	0	0	0	0	0	0	0	0	0	0	0	0		0	0	0	1	0	0	0	0
H100_DRIL32.095F2_49	Plate_02	B01	H100_DRIL32.095	0	0	0	0	0		0	0	0	0	0	0	0	0	0	0	0	0	0	0		0	0	0	1	0	0	0	0
H100_DRIL32.095F2_5	Plate_02	D01	H100_DRIL32.095	0	0	0	0	0		0	0	0	0	0	0	0	0	0	0	0	0	0	0		0	0	1	2	0	0	0	0
H100_DRIL32.095F2_50	Plate_02	F02	H100_DRIL32.095	0	0	0	0	0	0	0	0	0	0	0	0	0	0	0	0	0	0	0	0		0	0	1	2	0	0	0	0
H100_DRIL32.095F2_51	Plate_02	F04	H100_DRIL32.095	0	0	0	0	0		0	0	0	0	0	0	0	0	0	0	0	0	0	0		0	0	0	2	0	0	0	0
H100_DRIL32.095F2_52	Plate_02	B04	H100_DRIL32.095	0	0	0	0	0		0	0	0	0	0	0	0	0	0	0	0	0	0	0		0	0	2	0	0	0	0	0
H100_DRIL32.095F2_53	Plate_02	G04	H100_DRIL32.095	0	0	0	0	0	0	0	0	0	0	0	0	0	0	0	0	0	0	0	0		0	0	1	1	0	0	0	0
H100_DRIL32.095F2_54	Plate_02	F07	H100_DRIL32.095	0	0	0	0	0		0	0	0	0	0	0	0	0	0	0	0	0	0	0		0	0	0	1	0	0	0	0
H100_DRIL32.095F2_55	Plate_02	C01	H100_DRIL32.095	0	0	0	0	0	0	0	0	0	0	0	0	0	0	0	0	0	0	0	0		0	0	0	1	0	0	0	0
H100_DRIL32.095F2_56	Plate_01	H10	H100_DRIL32.095	0	0	0	0	0	0	0	0	0	0	0	0	0	0	0	0	0	0	0	0		0	0	2	1	0	0	0	0
H100_DRIL32.095F2_57	Plate_02	E06	H100_DRIL32.095	0	0	0	0	0	0	0	0	0	0	0	0	0	0	0	0	0	0	0	0		0	0	1	0	0	0	0	0
H100_DRIL32.095F2_58	Plate_02	A05	H100_DRIL32.095	0	0	0	0	0		0	0	0	0	0	0	0	0	0	0	0	0	0	0		0	0	2	1	0	0	0	0
H100_DRIL32.095F2_59	Plate_02	H05	H100_DRIL32.095	0	0	0	0	0	1	0	0	0	0	0	0	0	0	0	0	0	0	0	0		0	0	0	1	0	0	0	0
H100_DRIL32.095F2_6	Plate_02	H01	H100_DRIL32.095	0	0	0	0	0	0	0	0	0	0	0	0	0	0	0	0	0	0	0	0		0	0	1	1	0	0	0	0
H100_DRIL32.095F2_60	Plate_02	B05	H100_DRIL32.095	0	0	0	0	0		0	0	0	0	0	0	0	0	0	0	0	0	0	0		0	0	0	1	0	0	0	0
H100_DRIL32.095F2_61	Plate_01	D11	H100_DRIL32.095	0	0	0	0	0	0	0	0	0	0	0	0	0	0	0	0	0	0	0	0		0	0	2	2	0	0	0	0
H100_DRIL32.095F2_62	Plate_01	H09	H100_DRIL32.095	0	0	0	0	0	0	0	0	0	0	0	0	0	0	0	0	0	0	0	0		0	0	0	1	0	0	0	0
H100_DRIL32.095F2_63	Plate_02	A06	H100_DRIL32.095	0	0	0	0	0	0	0	0	0	0	0	0	0	0	0	0	0	0	0	0		0	0	0	1	0	0	0	0
H100_DRIL32.095F2_64	Plate_02	D06	H100_DRIL32.095	0	0	0	0	0	0	0	0	0	0	0	0	0	0	0	0	0	0	0	0		0	0	1	1	0	0	0	0
H100_DRIL32.095F2_65	Plate_01	C09	H100_DRIL32.095	0	0	0	0	0		0	0	0	0	0	0	0	0	0	0	0	0	0	0		0	0	0	1	0	0	0	0
H100_DRIL32.095F2_66	Plate_02	B06	H100_DRIL32.095	0	0	0	0	0	0	0	0	0	0	0	0	0	0	0	0	0	0	0	0		0	0	0	1	0	0	0	0
H100_DRIL32.095F2_67	Plate_02	H02	H100_DRIL32.095	0	0	0	0	0	0	0	0	0	0	0	0	0	0	0	0	0	0	0	0		0	0	0	0	0	0	0	0
H100_DRIL32.095F2_68	Plate_02	A02	H100_DRIL32.095	0	0	0	0	0	0	0	0	0	0	0	0	0	0	0	0	0	0	0	0		0	0	2	2	0	0	0	0
H100_DRIL32.095F2_69	Plate_01	G11	H100_DRIL32.095	0	0	0	0	0		0	0	0	0	0	0	0	0	0	0	0	0	0	0		0	0	1	1	0	0	0	0
H100_DRIL32.095F2_7	Plate_02	A03	H100_DRIL32.095	0	0	0	0	0	0	0	0	0	0	0	0	0	0	0	0	0	0	0	0		0	0	1	1	0	0	0	0
H100_DRIL32.095F2_70	Plate_02	D07	H100_DRIL32.095	0	0	0	0	0	0	0	0	0	0	0	0	0	0	0	0	0	0	0	0		0	0	0	2	0	0	0	0
H100_DRIL32.095F2_71	Plate_02	G05	H100_DRIL32.095	0	0	0	0	0	0	0	0	0	0	0	0	0	0	0	0	0	0	0	0		0	0	1	2	0	0	0	0
H100_DRIL32.095F2_72	Plate_02	G01	H100_DRIL32.095	0	0	0	0	0	0	0	0	0	0	0	0	0	0	0	0	0	0	0	0		0	0	2	1	0	0	0	0
H100_DRIL32.095F2_73	Plate_01	D12	H100_DRIL32.095	0	0	0	0	0	0	0	0	0	0	0	0	0	0	0	0	0	0	0	0		0	0	1	1	0	0	0	0
H100_DRIL32.095F2_74	Plate_02	E03	H100_DRIL32.095	0	0	0	0	0	0	0	0	0	0	0	0	0	0	0	0	0	0	0	0		0	0	0	1	0	0	0	0
H100_DRIL32.095F2_75	Plate_02	A01	H100_DRIL32.095	0	0	0	0	0		0	0	0	0	0	0	0	0	0	0	0	0	0	0		0	0	2	0	0	0	0	0
H100_DRIL32.095F2_76	Plate_01	A09	H100_DRIL32.095	0	0	0	0	0	0	0	0	0	0	0	0	0	0	0	0	0	0	0	0		0	0	2	0	0	0	0	0
H100_DRIL32.095F2_77	Plate_02	H06	H100_DRIL32.095	0	0	0	0	0	0	0	0	0	0	0	0	0	0	0	0	0	0	0	0		0	0	0	1	0	0	0	0
H100_DRIL32.095F2_78	Plate_02	A04	H100_DRIL32.095	0	0	0	0	0	0	0	0	0	0	0	0	0	0	0	0	0	0	0	0		0	0	0	0	0	0	0	0
H100_DRIL32.095F2_79	Plate_02	E02	H100_DRIL32.095	0	0	0	0	0		0	0	0	0	0	0	0	0	0	0	0	0	0	0		0	0	1	0	0	0	0	0
H100_DRIL32.095F2_80	Plate_01	G10	H100_DRIL32.095	0	0	0	0	0	1	0	0	0	0	0	0	0	0	0	0	0	0	0	0		0	0	0	2	0	0	0	0
H100_DRIL32.095F2_81	Plate_01	E12	H100_DRIL32.095	0	0	0	0	0	0	0	0	0	0	0	0	0	0	0	0	0	0	0	0		0	0	0	2	0	0	0	0
H100_DRIL32.095F2_82	Plate_01	E10	H100_DRIL32.095	0	0	0	0	0	0	0	0	0	0	0	0	0	0	0	0	0	0	0	0		0	0	0	2	0	0	0	0
H100_DRIL32.095F2_83	Plate_02	E04	H100_DRIL32.095	0	0	0	0	0		0	0	0	0	0	0	0	0	0	0	0	0	0	0		0	0	0	1	0	0	0	0
H100_DRIL32.095F2_84	Plate_02	B03	H100_DRIL32.095	0	0	0	0	0	0	0	0	0	0	0	0	0	0	0	0	0	0	0	0		0	0	1	0	0	0	0	0
H100_DRIL32.095F2_85	Plate_01	E11	H100_DRIL32.095	0	0	0	0	0	0	0	0	0	0	0	0	0	0	0	0	0	0	0	0		0	0	1	1	0	0	0	0
H100_DRIL32.095F2_86	Plate_02	B02	H100_DRIL32.095	0	0	0	0	0	1	0	0	0	0	0	0	0	0	0	0	0	0	0	0		0	0	1	1	0	0	0	0
H100_DRIL32.095F2_9	Plate_02	C02	H100_DRIL32.095	0	0	0	0	0		0	0	0	0	0	0	0	0	0	0	0	0	0	0		0	0	0	2	0	0	0	0
H100_DRIL32.134F2_1	Plate_010	A02	H100_DRIL32.134	0	0	0	0	1	0	0	0	1	0	0	0	0	0	0	0	0	0	0	1	2	0	0	0	0	0	0	0	0
H100_DRIL32.134F2_10	Plate_010	G01	H100_DRIL32.134	0	0	0	0	0	0	0	0	0	0	0	0	0	0	0	0	0	0	0	2	2	0	1	0	0	0	2	0	0
H100_DRIL32.134F2_11	Plate_010	A01	H100_DRIL32.134	0	0	0	0	0		0	0	1	0	0	0	0	0	0	0	0	0	0	1		0	2	0	0	0	1	0	0
H100_DRIL32.134F2_12	Plate_010	E01	H100_DRIL32.134	0	0	0	0	0	0	0	0	1	0	0	0	0	0	0	0	0	0	0	1		0	0	0	0	0	1	0	0
H100_DRIL32.134F2_13	Plate_010	C01	H100_DRIL32.134	0	0	0	0	0	0	0	0	0	0	0	0	0	0	0	0	0	0	0	0		0	1	0	0	0	0	0	0
H100_DRIL32.134F2_14	Plate_09	A09	H100_DRIL32.134	0	0	0	0	0	0	0	0	0	0	0	0	0	0	0	0	0	0	0	1	2	0	0	0	0	0	1	0	0
H100_DRIL32.134F2_15	Plate_09	H09	H100_DRIL32.134	0	0	0	0	0	0	0	0	2	0	0	0	0	0	0	0	0	0	0	1	2	0	2	0	0	0	2	0	0
H100_DRIL32.134F2_16	Plate_09	D09	H100_DRIL32.134	0	0	0	0	2	0	0	0	0	0	0	0	0	0	0	0	0	0	0	2	2	0	0	0	0	0	1	0	0
H100_DRIL32.134F2_17	Plate_09	D12	H100_DRIL32.134	0	0	0	0	0	0	0	0	0	0	0	0	0	0	0	0	0	0	0	0		0	2	0	0	0	0	0	0
H100_DRIL32.134F2_18	Plate_010	E03	H100_DRIL32.134	0	0	0	0	1	0	0	0	0	0	0	0	0	0	0	0	0	0	0	2	2	0	1	0	0	0	1	0	0
H100_DRIL32.134F2_19	Plate_09	F12	H100_DRIL32.134	0	0	0	0	0	0	0	0	1	0	0	0	0	0	0	0	0	0	0	2	2	0	0	0	0	0	2	0	0
H100_DRIL32.134F2_2	Plate_010	C02	H100_DRIL32.134	0	0	0	0	0	0	0	0	1	0	0	0	0	0	0	0	0	0	0	1		0	0	0	0	0	0	0	0
H100_DRIL32.134F2_20	Plate_010	B02	H100_DRIL32.134	1	1	1	1	1	0	0	0	1	1	0	0	1	0	1	0	0	1	0	1	2	0	1	0	0	0	1	0	1
H100_DRIL32.134F2_21	Plate_010	B01	H100_DRIL32.134	0	0	0	0	1	0	0	0	0	0	0	0	0	0	0	0	0	0	0	1	2	0	1	0	0	0	1	0	0
H100_DRIL32.134F2_22	Plate_09	A11	H100_DRIL32.134	0	0	0	0	0	1	0	0	2	0	0	0	0	0	0	0	0	0	0	2	2	0	1	0	0	0	2	0	0
H100_DRIL32.134F2_23	Plate_010	C03	H100_DRIL32.134	0	0	0	0	0	0	0	0	1	0	0	0	0	0	0	0	0	0	0	0		0	1	0	0	0	0	0	0
H100_DRIL32.134F2_24	Plate_010	C04	H100_DRIL32.134	0	0	0	0	0	0	0	0	2	0	0	0	0	0	0	0	0	0	0	2	2	0	0	0	0	0	2	0	0
H100_DRIL32.134F2_25	Plate_09	F08	H100_DRIL32.134	0	0	0	0	0	0	0	0	1	0	0	0	0	0	0	0	0	0	0	1		0	2	0	0	0	1	0	0
H100_DRIL32.134F2_26	Plate_09	H08	H100_DRIL32.134	0	0	0	0	0	0	0	0	0	0	0	0	0	0	0	0	0	0	0	1	2	0	2	0	0	0	1	0	0
H100_DRIL32.134F2_27	Plate_010	B03	H100_DRIL32.134	0	0	0	0	0	0	0	0	0	0	0	0	0	0	0	0	0	0	0	1	2	0	1	0	0	0	1	0	0
H100_DRIL32.134F2_28	Plate_09	D10	H100_DRIL32.134	0	0	0	0	0	0	0	0	1	0	0	0	0	0	0	0	0	0	0	0		0	0	0	0	0	0	0	0
H100_DRIL32.134F2_29	Plate_09	E08	H100_DRIL32.134	0	0	0	0	0	0	0	0	1	0	0	0	0	0	0	0	0	0	0	0		0	2	0	0	0	0	0	0
H100_DRIL32.134F2_3	Plate_09	C10	H100_DRIL32.134	0	0	0	0	1	0	0	0	0	0	0	0	0	0	0	0	0	0	0	1	2	0	1	0	0	0	1	0	0
H100_DRIL32.134F2_30	Plate_010	D03	H100_DRIL32.134	0	0	0	0	1	0	0	0	1	0	0	0	0	0	0	0	0	0	0	0		0	1	0	0	0	0	0	0
H100_DRIL32.134F2_31	Plate_09	C12	H100_DRIL32.134	0	0	0	0	1	1	0	0	1	0	0	0	0	0	0	0	0	0	0	2	2	0	1	0	0	0	2	0	0
H100_DRIL32.134F2_32	Plate_010	H03	H100_DRIL32.134	0	0	0	0	1	0	0	0	1	0	0	0	0	0	0	0	0	0	0	1	2	0	2	0	0	0	1	0	0
H100_DRIL32.134F2_33	Plate_09	B10	H100_DRIL32.134	0	0	0	0	0	0	0	0	1	0	0	0	0	0	0	0	0	0	0	1	2	0	2	0	0	0	1	0	0
H100_DRIL32.134F2_34	Plate_09	G09	H100_DRIL32.134	0	0	0	0	0		0	0	1	0	0	0	0	0	0	0	0	0	0	0		0	1	0	0	0	0	0	0
H100_DRIL32.134F2_35	Plate_010	A04	H100_DRIL32.134	0	0	0	0	0	0	0	0	0	0	0	0	0	0	0	0	0	0	0	2	2	0	0	0	0	0	2	0	0
H100_DRIL32.134F2_36	Plate_09	E10	H100_DRIL32.134	0	0	0	0	0		0	0	0	0	0	0	0	0	0	0	0	0	0	2	2	0	0	0	0	0	2	0	0
H100_DRIL32.134F2_37	Plate_09	E12	H100_DRIL32.134	0	0	0	0	0	0	0	0	1	0	0	0	0	0	0	0	0	0	0	2	2	0	2	0	0	0	2	0	0
H100_DRIL32.134F2_38	Plate_010	H01	H100_DRIL32.134	0	0	0	0	0	0	0	0	1	0	0	0	0	0	0	0	0	0	0	2	2	0	1	0	0	0	1	0	0
H100_DRIL32.134F2_39	Plate_09	H10	H100_DRIL32.134	0	0	0	0	2	0	0	0	1	0	0	0	0	0	0	0	0	0	0	1	2	0	1	0	0	0	1	0	0
H100_DRIL32.134F2_4	Plate_010	E02	H100_DRIL32.134	0	0	0	0	0	0	0	0	2	0	0	0	0	0	0	0	0	0	0	1		0	1	0	0	0	0	0	0
H100_DRIL32.134F2_40	Plate_010	B04	H100_DRIL32.134	0	0	0	0	1	0	0	0	1	0	0	0	0	0	0	0	0	0	0	0	2	0	1	0	0	0	1	0	0
H100_DRIL32.134F2_41	Plate_010	H02	H100_DRIL32.134	0	0	0	0	2	0	0	0	2	0	0	0	0	0	0	0	0	0	0	0		0	2	0	0	0	0	0	0
H100_DRIL32.134F2_42	Plate_09	G10	H100_DRIL32.134	0	0	0	0	1	0	0	0	1	0	0	0	0	0	0	0	0	0	0	0	2	0	0	0	0	0	1	0	0
H100_DRIL32.134F2_43	Plate_09	G08	H100_DRIL32.134	0	0	0	0	0	0	0	0	1	0	0	0	0	0	0	0	0	0	0	1	2	0	1	0	0	0	1	0	0
H100_DRIL32.134F2_44	Plate_010	F02	H100_DRIL32.134	0	0	0	0	0		0	0	0	0	0	0	0	0	0	0	0	0	0	1		0	2	0	0	0	1	0	0
H100_DRIL32.134F2_45	Plate_010	F04	H100_DRIL32.134	0	0	0	0	0	0	0	0	1	0	0	0	0	0	0	0	0	0	0	1	2	0	1	0	0	0	1	0	0
H100_DRIL32.134F2_46	Plate_09	E11	H100_DRIL32.134	0	0	0	0	0	0	0	0	0	0	0	0	0	0	0	0	0	0	0	2	2	0	1	0	0	0	1	0	0
H100_DRIL32.134F2_47	Plate_09	F09	H100_DRIL32.134	0	0	0	0	0		0	0	0	0		0	0	0	0	0	0	0	0	0		0	1	0	0	0	0	0	0
H100_DRIL32.134F2_48	Plate_09	C11	H100_DRIL32.134	0	0	0	0	0	0	0	0	1	0	0	0	0	0	0	0	0	0	0	0		0	2	0	0	0	0	0	0
H100_DRIL32.134F2_49	Plate_09	B12	H100_DRIL32.134	0	0	0	0	0	0	0	0	1	0	0	0	0	0	0	0	0	0	0	1	2	0	1	0	0	0	1	0	0
H100_DRIL32.134F2_5	Plate_010	D04	H100_DRIL32.134	0	0	0	0	0	0	0	0	0	0	0	0	0	0	0	0	0	0	0	0		0	1	0	0	0	0	0	0
H100_DRIL32.134F2_50	Plate_09	B09	H100_DRIL32.134	0	0	0	0	0	0	0	0	1	0	0	0	0	0	0	0	0	0	0	1	2	0	1	0	0	0	1	0	0
H100_DRIL32.134F2_51	Plate_010	D02	H100_DRIL32.134	0	0	0	0	0	0	0	0	1	0	0	0	0	0	0	0	0	0	0	0		0	2	0	0	0	0	0	0
H100_DRIL32.134F2_52	Plate_010	G03	H100_DRIL32.134	0	0	0	0	0	0	0	0	2	0	0	0	0	0	0	0	0	0	0	2	2	0	2	0	0	0	2	0	0
H100_DRIL32.134F2_53	Plate_09	B11	H100_DRIL32.134	0	0	0	0	0	0	0	0	0	0	0	0	0	0	0	0	0	0	0	2	2	0	1	0	0	0	2	0	0
H100_DRIL32.134F2_54	Plate_09	F10	H100_DRIL32.134	0	0	0	0	0	0	0	0	1	0	0	0	0	0	0	0	0	0	0	1	2	0	0	0	0	0	1	0	0
H100_DRIL32.134F2_55	Plate_010	G02	H100_DRIL32.134	0	0	0	0	0	0	0	0	2	0	0	0	0	0	0	0	0	0	0	1	2	0	1	0	0	0	1	0	0
H100_DRIL32.134F2_56	Plate_09	G11	H100_DRIL32.134	0	0	0	0	0	0	0	0	1	0	0	0	0	0	0	0	0	0	0	0		0	0	0	0	0	0	0	0
H100_DRIL32.134F2_57	Plate_09	D11	H100_DRIL32.134	0	0	0	0	0	0	0	0	1	0	0	0	0	0	0	0	0	0	0	0		0	1	0	0	0	0	0	0
H100_DRIL32.134F2_58	Plate_010	E04	H100_DRIL32.134	0	0	0	0	0		0	0	2	0	0	0	0	0	0	0	0	0	0	1	2	0	1	0	0	0	1	0	0
H100_DRIL32.134F2_59	Plate_010	A03	H100_DRIL32.134	0	0	0	0	0	0	0	0	1	0	0	0	0	0	0	0	0	0	0	1	2	0	0	0	0	0	1	0	0
H100_DRIL32.134F2_6	Plate_09	C09	H100_DRIL32.134	0	0	0	0	0	0	0	0	0	0	0	0	0	0	0	0	0	0	0	1	2	0	0	0	0	0	1	0	0
H100_DRIL32.134F2_60	Plate_010	F03	H100_DRIL32.134	0	0	0	0	0	0	0	0	2	0	0	0	0	0	0	0	0	0	0	1	2	0	1	0	0	0	1	0	0
H100_DRIL32.134F2_61	Plate_09	A12	H100_DRIL32.134	0	0	0	0	1	0	0	0	2	0	0	0	0	0	0	0	0	0	0	2	2	0	0	0	0	0	2	0	0
H100_DRIL32.134F2_62	Plate_09	F11	H100_DRIL32.134	0	0	0	0	0	0	0	0	1	0	0	0	0	0	0	0	0	0	0	0		0	0	0	0	0	0	0	0
H100_DRIL32.134F2_63	Plate_09	E09	H100_DRIL32.134	0	0	0	0	2		0	0	2	0	0	0	0	0	0	0	0	0	0	1	2	0	2	0	0	0	1	0	0
H100_DRIL32.134F2_7	Plate_09	H11	H100_DRIL32.134	0	0	0	0	0		0	0	2	0	0	0	0	0	0	0	0	0	0	1	2	0	2	0	0	0	1	0	0
H100_DRIL32.134F2_8	Plate_010	D01	H100_DRIL32.134	0	0	0	0	1	0	0	0	1	0	0	0	0	0	0	0	0	0	0	0	2	0	0	0	0	0	1	0	0
H100_DRIL32.134F2_9	Plate_09	A10	H100_DRIL32.134	0	0	0	0	1	0	0	0	1	0	0	0	0	0	0	0	0	0	0	2	2	0	1	0	0	0	2	0	0
H100_DRIL32.191F2_1	Plate_04	A10	H100_DRIL32.191	0	0	0	0	0	0	0	0	0	0	0	0	0	0	0	0	0	0	0	0		0	0	0	1	1	0	0	0
H100_DRIL32.191F2_10	Plate_05	G01	H100_DRIL32.191	0	0	0	0	0	0	0	0	0	0	0	0	0	0	0	0	0	1	0	0		0	0	0	1	2	0	0	0
H100_DRIL32.191F2_11	Plate_04	B09	H100_DRIL32.191	0	0	0	0	0	0	0	0	0	0	0	0	0	0	0	0	0	2	0	0		0	0	0	1	1	0	0	0
H100_DRIL32.191F2_12	Plate_04	G11	H100_DRIL32.191	0	0	0	0	0	0	0	0	0	0	0	0	0	0	0	0	0	2	0	0		0	0	0	2	1	0	0	0
H100_DRIL32.191F2_13	Plate_04	H09	H100_DRIL32.191	0	0	0	0	0	0	0	0	0	0	0	0	0	0	0	0	0	2	0	0		0	0	0	1	0	0	0	0
H100_DRIL32.191F2_14	Plate_04	G08	H100_DRIL32.191	0	0	0	0	0	0	0	0	0	0	0	0	0	0	0	0	0	1	0	0		0	0	0	1	0	0	0	0
H100_DRIL32.191F2_15	Plate_04	F11	H100_DRIL32.191	0	0	0	0	0	0	0	0	0	0	0	0	0	0	0	0	0	1	0	0		0	0	0	1	0	0	0	0
H100_DRIL32.191F2_16	Plate_05	B02	H100_DRIL32.191	0	0	0	0	0		0	0	0	0	0	0	0	0	0	0	0	0	0	0		0	0	0	2	0	0	0	0
H100_DRIL32.191F2_17	Plate_04	F09	H100_DRIL32.191	0	0	0	0	0	0	0	0	0	0	0	0	0	0	0	0	0	2	0	0		0	0	0	1	0	0	0	0
H100_DRIL32.191F2_18	Plate_04	B12	H100_DRIL32.191	0	0	0	0	0	0	0	0	0	0	0	0	0	0	0	0	0	0	0	0		0	0	0	0	0	0	0	0
H100_DRIL32.191F2_19	Plate_05	D05	H100_DRIL32.191	0	0	0	0	0	0	0	0	0	0	0	0	0	0	0	0	0	1	0	0		0	0	0	1	0	0	0	0
H100_DRIL32.191F2_2	Plate_04	D11	H100_DRIL32.191	0	0	0	0	0	0	0	0	0	0	0	0	0	0	0	0	0	1	0	0		0	0	0	2	2	0	0	0
H100_DRIL32.191F2_20	Plate_05	A05	H100_DRIL32.191	0	0	0	0	0	0	0	0	0	0	0	0	0	0	0	0	0	2	0	0		0	0	0	1	1	0	0	0
H100_DRIL32.191F2_21	Plate_05	B05	H100_DRIL32.191	0	0	0	0	0	0	0	0	0	0	0	0	0	0	0	0	0	1	0	0		0	0	0	1	2	0	0	0
H100_DRIL32.191F2_22	Plate_04	H11	H100_DRIL32.191	0	0	0	0	0	0	0	0	0	0	0	0	0	0	0	0	0	0	0	0		0	0	0	1	1	0	0	0
H100_DRIL32.191F2_23	Plate_04	B07	H100_DRIL32.191	0	0	0	0	0	0	0	0	0	0	0	0	0	0	0	0	0	1	0	0		0	0	0	2	2	0	0	0
H100_DRIL32.191F2_24	Plate_04	D10	H100_DRIL32.191	0	0	0	0	0	0	0	0	0	0	0	0	0	0	0	0	0	1	0	0		0	0	0	0	1	0	0	0
H100_DRIL32.191F2_25	Plate_05	B03	H100_DRIL32.191	0	0	0	0	0	0	0	0	0	0	0	0	0	0	0	0	0	1	0	0		0	0	0	1	0	0	0	0
H100_DRIL32.191F2_26	Plate_05	E03	H100_DRIL32.191	0	0	0	0	0		0	0	0	0	0	0	0	0	0	0	0	0	0	0		0	0	0	1	0	0	0	0
H100_DRIL32.191F2_27	Plate_05	D01	H100_DRIL32.191	0	0	0	0	0	0	0	0	0	0	0	0	0	0	0	0	0	0	0	0		0	0	0	1	1	0	0	0
H100_DRIL32.191F2_28	Plate_04	H07	H100_DRIL32.191	0	0	0	0	0	0	0	0	0	0	0	0	0	0	0	0	0	0	0	0		0	0	0	1	2	0	0	0
H100_DRIL32.191F2_29	Plate_05	F01	H100_DRIL32.191	0	0	0	0	0		0	0	0	0	0	0	0	0	0	0	0	2	0	0		0	0	0	1	1	0	0	0
H100_DRIL32.191F2_3	Plate_04	B10	H100_DRIL32.191	0	0	0	0	0	0	0	0	0	0	0	0	0	0	0	0	0	0	0	0		0	0	0	1	1	0	0	0
H100_DRIL32.191F2_30	Plate_04	C08	H100_DRIL32.191	0	0	0	0	0	0	0	0	0	0	0	0	0	0	0	0	0	1	0	0		0	0	0	1	0	0	0	0
H100_DRIL32.191F2_31	Plate_04	D09	H100_DRIL32.191	0	0	0	0	0	0	0	0	0	0	0	0	0	0	0	0	0	1	0	0		0	0	0	1	1	0	0	0
H100_DRIL32.191F2_32	Plate_05	B01	H100_DRIL32.191	0	0	0	0	0	0	0	0	0	0	0	0	0	0	0	0	0	1	0	0		0	0	0	1	1	0	0	0
H100_DRIL32.191F2_33	Plate_04	D07	H100_DRIL32.191	0	0	0	0	0	0	0	0	0	0	0	0	0	0	0	0	0	2	0	0		0	0	0	1	1	0	0	0
H100_DRIL32.191F2_34	Plate_05	C02	H100_DRIL32.191	0	0	0	0	0		0	0	0	0	0	0	0	0	0	0	0	2	0	0		0	0	0	0	0	0	0	0
H100_DRIL32.191F2_35	Plate_05	C03	H100_DRIL32.191	0	0	0	0	0		0	0	0	0	0	0	0	0	0	0	0	1	0	0		0	0	0	1	1	0	0	0
H100_DRIL32.191F2_36	Plate_05	C05	H100_DRIL32.191	0	0	0	0	0	0	0	0	0	0	0	0	0	0	0	0	0	2	0	0		0	0	0	0	1	0	0	0
H100_DRIL32.191F2_37	Plate_05	H02	H100_DRIL32.191	0	0	0	0	0		0	0	0	0	0	0	0	0	0	0	0	1	0	0		0	0	0	0	1	0	0	0
H100_DRIL32.191F2_38	Plate_05	D02	H100_DRIL32.191	0	0	0	0	0		0	0	0	0	0	0	0	0	0	0	0	1	0	0		0	0	0	0	1	0	0	0
H100_DRIL32.191F2_39	Plate_05	B04	H100_DRIL32.191	0	0	0	0	0	1	0	0	0	0	0	0	0	0	0	0	0	1	0	0		0	0	0	2	1	0	0	0
H100_DRIL32.191F2_4	Plate_04	E09	H100_DRIL32.191	0	0	0	0	0	0	0	0	0	0	0	0	0	0	0	0	0	1	0	0		0	0	0	1	1	0	0	0
H100_DRIL32.191F2_40	Plate_05	E01	H100_DRIL32.191	0	0	0	0	0		0	0	0	0	0	0	0	0	0	0	0	1	0	0		0	0	0	0	0	0	0	0
H100_DRIL32.191F2_41	Plate_04	H10	H100_DRIL32.191	0	0	0	0	0	0	0	0	0	0	0	0	0	0	0	0	0	0	0	0		0	0	0	1	1	0	0	0
H100_DRIL32.191F2_42	Plate_04	D12	H100_DRIL32.191	0	0	0	0	0	0	0	0	0	0	0	0	0	0	0	0	0	1	0	0		0	0	0	1	0	0	0	0
H100_DRIL32.191F2_43	Plate_04	B11	H100_DRIL32.191	0	0	0	0	0		0	0	0	0	0	0	0	0	0	0	0	1	0	0		0	0	0	0	2	0	0	0
H100_DRIL32.191F2_44	Plate_04	G10	H100_DRIL32.191	0	0	0	0	0	0	0	0	0	0	0	0	0	0	0	0	0	1	0	0		0	0	0	1	0	0	0	0
H100_DRIL32.191F2_45	Plate_04	F12	H100_DRIL32.191	0	0	0	0	0	0	0	0	0	0	0	0	0	0	0	0	0	2	0	0		0	0	0	2	1	0	0	0
H100_DRIL32.191F2_46	Plate_05	F03	H100_DRIL32.191	0	0	0	0	0		0	0	0	0	0	0	0	0	0	0	0	0	0	0		0	0	0	0	1	0	0	0
H100_DRIL32.191F2_47	Plate_04	H08	H100_DRIL32.191	0	0	0	0	0	0	0	0	0	0	0	0	0	0	0	0	0	1	0	0		0	0	0	2	2	0	0	0
H100_DRIL32.191F2_48	Plate_05	E04	H100_DRIL32.191	0	0	0	0	0	0	0	0	0	0	0	0	0	0	0	0	0	1	0	0		0	0	0	1	1	0	0	0
H100_DRIL32.191F2_49	Plate_04	H06	H100_DRIL32.191	0	0	0	0	0	0	0	0	0	0	0	0	0	0	0	0	0	0	0	0		0	0	0	2	2	0	0	0
H100_DRIL32.191F2_5	Plate_04	C12	H100_DRIL32.191	0	0	0	0	0	0	0	0	0	0	0	0	0	0	0	0	0	0	0	0		0	0	0	2	1	0	0	0
H100_DRIL32.191F2_50	Plate_04	C07	H100_DRIL32.191	0	0	0	0	0	0	0	0	0	0	0	0	0	0	0	0	0	1	0	0		0	0	0	1	1	0	0	0
H100_DRIL32.191F2_51	Plate_04	E10	H100_DRIL32.191	0	0	0	0	0	0	0	0	0	0	0	0	0	0	0	0	0	1	0	0		0	0	0	2	0	0	0	0
H100_DRIL32.191F2_52	Plate_05	C01	H100_DRIL32.191	0	0	0	0	0	0	0	0	0	0	0	0	0	0	0	0	0	2	0	0		0	0	0	1	1	0	0	0
H100_DRIL32.191F2_53	Plate_05	G05	H100_DRIL32.191	0	0	0	0	0	0	0	0	0	0	0	0	0	0	0	0	0	0	0	0		0	0	0	0	2	0	0	0
H100_DRIL32.191F2_54	Plate_04	A11	H100_DRIL32.191	0	0	0	0	0	0	0	0	0	0	0	0	0	0	0	0	0	1	0	0		0	0	0	1	0	0	0	0
H100_DRIL32.191F2_55	Plate_04	E12	H100_DRIL32.191	0	0	0	0	0	0	0	0	0	0	0	0	0	0	0	0	0	1	0	0		0	0	0	0	1	0	0	0
H100_DRIL32.191F2_56	Plate_04	F10	H100_DRIL32.191	0	0	0	0	0	0	0	0	0	0	0	0	0	0	0	0	0	1	0	0		0	0	0	0	1	0	0	0
H100_DRIL32.191F2_57	Plate_05	G04	H100_DRIL32.191	0	0	0	0	0	0	0	0	0	0	0	0	0	0	0	0	0	2	0	0		0	0	0	1	2	0	0	0
H100_DRIL32.191F2_58	Plate_05	A04	H100_DRIL32.191	0	0	0	0	0	0	0	0	0	0	0	0	0	0	0	0	0	1	0	0		0	0	0	2	2	0	0	0
H100_DRIL32.191F2_59	Plate_04	G09	H100_DRIL32.191	0	0	0	0	0	0	0	0	0	0	0	0	0	0	0	0	0	2	0	0		0	0	0	0	2	0	0	0
H100_DRIL32.191F2_6	Plate_04	A12	H100_DRIL32.191	0	0	0	0	0	0	0	0	0	0	0	0	0	0	0	0	0	1	0	0		0	0	0	0	1	0	0	0
H100_DRIL32.191F2_60	Plate_04	E11	H100_DRIL32.191	0	0	0	0	0	0	0	0	0	0	0	0	0	0	0	0	0	0	0	0		0	0	0	1	0	0	0	0
H100_DRIL32.191F2_61	Plate_04	C09	H100_DRIL32.191	0	0	0	0	0	0	0	0	0	0	0	0	0	0	0	0	0	0	0	0		0	0	0	2	1	0	0	0
H100_DRIL32.191F2_62	Plate_05	F02	H100_DRIL32.191	0	0	0	0	0	0	0	0	0	0	0	0	0	0	0	0	0	2	0	0		0	0	0	2	1	0	0	0
H100_DRIL32.191F2_63	Plate_05	G02	H100_DRIL32.191	0	0	0	0	0	0	0	0	0	0	0	0	0	0	0	0	0	2	0	0		0	0	0	0	0	0	0	0
H100_DRIL32.191F2_64	Plate_05	D03	H100_DRIL32.191	0	0	0	0	0		0	0	0	0	0	0	0	0	0	0	0	1	0	0		0	0	0	1	0	0	0	0
H100_DRIL32.191F2_65	Plate_05	F05	H100_DRIL32.191	0	0	0	0	0	0	0	0	0	0	0	0	0	0	0	0	0	2	0	0		0	0	0	1	2	0	0	0
H100_DRIL32.191F2_66	Plate_04	C11	H100_DRIL32.191	0	0	0	0	0	0	0	0	0	0	0	0	0	0	0	0	0	1	0	0		0	0	0	1	1	0	0	0
H100_DRIL32.191F2_67	Plate_05	F04	H100_DRIL32.191	0	0	0	0	0		0	0	0	0	0	0	0	0	0	0	0	2	0	0		0	0	0	1	1	0	0	0
H100_DRIL32.191F2_68	Plate_05	H01	H100_DRIL32.191	0	0	0	0	0	0	0	0	0	0	0	0	0	0	0	0	0	0	0	0		0	0	0	1	2	0	0	0
H100_DRIL32.191F2_69	Plate_04	F07	H100_DRIL32.191	0	0	0	0	0	0	0	0	0	0	0	0	0	0	0	0	0	2	0	0		0	0	0	1	1	0	0	0
H100_DRIL32.191F2_7	Plate_05	D04	H100_DRIL32.191	0	0	0	0	0	0	0	0	0	0	0	0	0	0	0	0	0	1	0	0		0	0	0	0	1	0	0	0
H100_DRIL32.191F2_70	Plate_04	E08	H100_DRIL32.191	0	0	0	0	0	0	0	0	0	0	0	0	0	0	0	0	0	0	0	0		0	0	0	1	2	0	0	0
H100_DRIL32.191F2_71	Plate_05	E02	H100_DRIL32.191	0	0	0	0	0		0	0	0	0	0	0	0	0	0	0	0	0	0	0		0	0	0	2	2	0	0	0
H100_DRIL32.191F2_72	Plate_04	E07	H100_DRIL32.191	0	0	0	0	0	1	0	0	0	0	0	0	0	0	0	0	0	0	0	0		0	0	0	0	1	0	0	0
H100_DRIL32.191F2_73	Plate_04	G07	H100_DRIL32.191	0	0	0	0	0		0	0	0	0	0	0	0	0	0	0	0	0	0	0		0	0	0	2	2	0	0	0
H100_DRIL32.191F2_74	Plate_05	A03	H100_DRIL32.191	0	0	0	0	0		0	0	0	0	0	0	0	0	0	0	0	1	0	0		0	0	0	0	1	0	0	0
H100_DRIL32.191F2_75	Plate_05	C04	H100_DRIL32.191	0	0	0	0	0		0	0	0	0	0	0	0	0	0	0	0	1	0	0		0	0	0	1	1	0	0	0
H100_DRIL32.191F2_76	Plate_04	D08	H100_DRIL32.191	0	0	0	0	0	0	0	0	0	0	0	0	0	0	0	0	0	1	0	0		0	0	0	1	1	0	0	0
H100_DRIL32.191F2_77	Plate_04	A07	H100_DRIL32.191	0	0	0	0	0	0	0	0	0	0	0	0	0	0	0	0	0	0	0	0		0	0	0	2	2	0	0	0
H100_DRIL32.191F2_78	Plate_04	B08	H100_DRIL32.191	0	0	0	0	0	0	0	0	0	0	0	0	0	0	0	0	0	0	0	0		0	0	0	0	0	0	0	0
H100_DRIL32.191F2_79	Plate_04	A08	H100_DRIL32.191	0	0	0	0	0	0	0	0	0	0	0	0	0	0	0	0	0	0	0	0		0	0	0	1	1	0	0	0
H100_DRIL32.191F2_8	Plate_04	G06	H100_DRIL32.191	0	0	0	0	0	0	0	0	0	0	0	0	0	0	0	0	0	1	0	0		0	0	0	0	1	0	0	0
H100_DRIL32.191F2_80	Plate_05	H04	H100_DRIL32.191	0	0	0	0	0	0	0	0	0	0	0	0	0	0	0	0	0	0	0	0		0	0	0	2	2	0	0	0
H100_DRIL32.191F2_81	Plate_05	H03	H100_DRIL32.191	0	0	0	0	0	0	0	0	0	0	0	0	0	0	0	0	0	0	0	0		0	0	0	1	1	0	0	0
H100_DRIL32.191F2_82	Plate_05	A02	H100_DRIL32.191	0	0	0	0	0	0	0	0	0	0	0	0	0	0	0	0	0	1	0	0		0	0	0	1	1	0	0	0
H100_DRIL32.191F2_83	Plate_04	A09	H100_DRIL32.191	0	0	0	0	0	0	0	0	0	0	0	0	0	0	0	0	0	2	0	0		0	0	0	1	1	0	0	0
H100_DRIL32.191F2_84	Plate_04	F08	H100_DRIL32.191	0	0	0	0	0	0	0	0	0	0	0	0	0	0	0	0	0	1	0	0		0	0	0	1	0	0	0	0
H100_DRIL32.191F2_85	Plate_05	A01	H100_DRIL32.191	0	0	0	0	0		0	0	0	0	0	0	0	0	0	0	0	0	0	0		0	0	0	2	2	0	0	0
H100_DRIL32.191F2_86	Plate_04	C10	H100_DRIL32.191	0	0	0	0	0	0	0	0	0	0	0	0	0	0	0	0	0	1	0	0		0	0	0	1	1	0	0	0
H100_DRIL32.191F2_9	Plate_05	E05	H100_DRIL32.191	0	0	0	0	0		0	0	0	0	0	0	0	0	0	0	0	0	0	0		0	0	0	0	0	0	0	0
H100_DRIL52.055F2_1	Plate_010	B11	H100_DRIL52.055	0	0	1	1	0	0	0	0	0	0	0	0	0	0	0	0	0	0	0	0		0	0	0	0	0	0	0	1
H100_DRIL52.055F2_10	Plate_010	H05	H100_DRIL52.055	1	0	1	1	0	0	0	0	0	0	0	0	0	0	0	0	0	0	0	0		0	0	0	0	0	0	0	0
H100_DRIL52.055F2_12	Plate_010	G10	H100_DRIL52.055	0	2	1	2	0	0	0	0	0	2	0	0	0	0	0	0	0	0	0	0		0	0	0	0	0	0	0	1
H100_DRIL52.055F2_13	Plate_010	G05	H100_DRIL52.055	1	1	1	1	0	0	0	0	0	1	0	0	0	0	0	0	0	0	0	0		0	0	0	0	0	0	0	1
H100_DRIL52.055F2_14	Plate_010	F09	H100_DRIL52.055	1	0	0	0	0	0	0	0	0	2	0	0	0	0	0	0	0	0	0	0		0	0	0	0	0	0	0	1
H100_DRIL52.055F2_15	Plate_010	F07	H100_DRIL52.055	2	0	1	1	0	0	0	0	0	0	0	0	0	0	0	0	0	0	0	0		0	0	0	0	0	0	0	2
H100_DRIL52.055F2_16	Plate_010	D12	H100_DRIL52.055	1	2	2	2	0	0	0	0	0	1	0	0	0	0	0	0	0	0	0	0		0	0	0	0	0	0	0	1
H100_DRIL52.055F2_17	Plate_010	H09	H100_DRIL52.055	2	1	1	1	0	0	0	0	0	1	0	0	0	0	0	0	0	0	0	0		0	0	0	0	0	0	0	2
H100_DRIL52.055F2_18	Plate_010	G07	H100_DRIL52.055	2	1	1	1	0	0	0	0	0	1	0	0	0	0	0	0	0	0	0	0		0	0	0	0	0	0	0	1
H100_DRIL52.055F2_19	Plate_010	H11	H100_DRIL52.055	0	1	2	2	0	0	0	0	0	1	0	0	0	0	0	0	0	0	0	0		0	0	0	0	0	0	0	2
H100_DRIL52.055F2_2	Plate_010	E07	H100_DRIL52.055	1	1	1	1	0	0	0	0	0	1	0	0	0	0	0	0	0	0	0	0		0	0	0	0	0	0	0	1
H100_DRIL52.055F2_20	Plate_010	E11	H100_DRIL52.055	0	2	2	2	0	0	0	0	0	1	0	0	0	0	0	0	0	0	0	0		0	0	0	0	0	0	0	0
H100_DRIL52.055F2_21	Plate_010	A06	H100_DRIL52.055	1	0	0	0	0	0	0	0	0	1	0	0	0	0	0	0	0	0	0	0		0	0	0	0	0	0	0	1
H100_DRIL52.055F2_22	Plate_010	D06	H100_DRIL52.055	1	1	0	0	0	0	0	0	0	1	0	0	0	0	0	0	0	0	0	0		0	0	0	0	0	0	0	1
H100_DRIL52.055F2_23	Plate_010	E05	H100_DRIL52.055	0	2	1	1	0	0	0	0	0	0	0	0	0	0	0	0	0	0	0	0		0	0	0	0	0	0	0	1
H100_DRIL52.055F2_24	Plate_010	C08	H100_DRIL52.055	0	2	1	1	0	0	0	0	0	0	0	0	0	0	0	0	0	0	0	0		0	0	0	0	0	0	0	1
H100_DRIL52.055F2_25	Plate_010	A09	H100_DRIL52.055	2	2	2	2	0	0	0	0	0	1	0	0	0	0	0	0	0	0	0	0		0	0	0	0	0	0	0	2
H100_DRIL52.055F2_26	Plate_010	E10	H100_DRIL52.055	0	1	1	1	0		0	0	0	2	0	0	0	0	0	0	0	0	0	0		0	0	0	0	0	0	0	1
H100_DRIL52.055F2_27	Plate_010	C07	H100_DRIL52.055	1	2	1	1	0	0	0	0	0	0	0	0	0	0	0	0	0	0	0	0		0	0	0	0	0	0	0	1
H100_DRIL52.055F2_28	Plate_010	H10	H100_DRIL52.055	1	0	1	1	0	0	0	0	0	1	0	0	0	0	0	0	0	0	0	0		0	0	0	0	0	0	0	2
H100_DRIL52.055F2_29	Plate_010	A05	H100_DRIL52.055	1	1	0	0	0	0	0	0	0	1	0	0	0	0	0	0	0	0	0	0		0	0	0	0	0	0	0	1
H100_DRIL52.055F2_3	Plate_010	A08	H100_DRIL52.055	1	2	0	0	0	0	0	0	0	0	0	0	0	0	0	0	0	0	0	0		0	0	0	0	0	0	0	2
H100_DRIL52.055F2_30	Plate_010	B08	H100_DRIL52.055	2	1	1	1	0	0	0	0	0	0	0	0	0	0	0	0	0	0	0	0		0	0	0	0	0	0	0	1
H100_DRIL52.055F2_31	Plate_010	D07	H100_DRIL52.055	2	0	1	1	0	0	0	0	0	0	0	0	0	0	0	0	0	0	0	0		0	0	0	0	0	0	0	1
H100_DRIL52.055F2_32	Plate_010	G04	H100_DRIL52.055	0	2	1	1	0	0	0	0	0	1	0	0	0	0	0	0	0	0	0	0		0	0	0	0	0	0	0	1
H100_DRIL52.055F2_33	Plate_010	A07	H100_DRIL52.055	1	2	1	1	0	0	0	0	0	1	0	0	0	0	0	0	0	0	0	0		0	0	0	0	0	0	0	2
H100_DRIL52.055F2_34	Plate_010	F11	H100_DRIL52.055	0	2	2	2	0	0	0	0	0	1	0	0	0	0	0	0	0	0	0	0		0	0	0	0	0	0	0	2
H100_DRIL52.055F2_35	Plate_010	B07	H100_DRIL52.055	1	1	0	0	0	0	0	0	0	2	0	0	0	0	0	0	0	0	0	0		0	0	0	0	0	0	0	0
H100_DRIL52.055F2_36	Plate_010	G06	H100_DRIL52.055	0	0	0	0	1	0	0	0	1	0	0	0	0	0	0	0	0	0	0	0		0	0	0	0	0	0	0	0
H100_DRIL52.055F2_37	Plate_010	E08	H100_DRIL52.055	0	2	1	0	0	0	0	0	0	1	0	0	0	0	0	0	0	0	0	0		0	0	0	0	0	0	0	2
H100_DRIL52.055F2_38	Plate_011	A01	H100_DRIL52.055	1	2	1	1	0	0	0	0	0	1	0	0	0	0	0	0	0	0	0	0		0	0	0	0	0	0	0	2
H100_DRIL52.055F2_39	Plate_010	B05	H100_DRIL52.055	1	0	0	0	0	0	0	0	0	1	0	0	0	0	0	0	0	0	0	0		0	0	0	0	0	0	0	2
H100_DRIL52.055F2_4	Plate_010	H04	H100_DRIL52.055	0	1	1	2	0	0	0	0	0	0	0	0	0	0	0	0	0	0	0	0		0	0	0	0	0	0	0	2
H100_DRIL52.055F2_40	Plate_010	D08	H100_DRIL52.055	2	0	1	1	0		0	0	0	1	0	0	0	0	0	0	0	0	0	0		0	0	0	0	0	0	0	2
H100_DRIL52.055F2_41	Plate_010	E09	H100_DRIL52.055	0	2	1	1	0	0	0	0	0	0	0	0	0	0	0	0	0	0	0	0		0	0	0	0	0	0	0	2
H100_DRIL52.055F2_42	Plate_010	F10	H100_DRIL52.055	2	2	1	1	0	0	0	0	0	0	0	0	0	0	0	0	0	0	0	0		0	0	0	0	0	0	0	1
H100_DRIL52.055F2_43	Plate_010	B10	H100_DRIL52.055	2	1	1	1	0	0	0	0	0	1	0	0	0	0	0	0	0	0	0	0		0	0	0	0	0	0	0	1
H100_DRIL52.055F2_44	Plate_010	F08	H100_DRIL52.055	0	0	1	1	0	0	0	0	0	1	0	0	0	0	0	0	0	0	0	0		0	0	0	0	0	0	0	2
H100_DRIL52.055F2_45	Plate_010	B06	H100_DRIL52.055	1	0	1	1	0	0	0	0	0	0	0	0	0	0	0	0	0	0	0	0		0	0	0	0	0	0	0	0
H100_DRIL52.055F2_46	Plate_011	B01	H100_DRIL52.055	1	2	1	2	0		0	0	0	0	0	0	0	0	0	0	0	0	0	0		0	0	0	0	0	0	0	2
H100_DRIL52.055F2_47	Plate_010	H08	H100_DRIL52.055	1	1	2	2	0	0	0	0	0	2	0	0	0	0	0	0	0	0	0	0		0	0	0	0	0	0	0	1
H100_DRIL52.055F2_48	Plate_010	A10	H100_DRIL52.055	1	2	1	1	0	0	0	0	0	2	0	0	0	0	0	0	0	0	0	0		0	0	0	0	0	0	0	0
H100_DRIL52.055F2_49	Plate_010	E06	H100_DRIL52.055	0	1	2	2	0	0	0	0	0	1	0	0	0	0	0	0	0	0	0	0		0	0	0	0	0	0	0	1
H100_DRIL52.055F2_5	Plate_011	D01	H100_DRIL52.055	1	1	2	2	0		0	0	0	2	0	0	0	0	0	0	0	0	0	0		0	0	0	0	0	0	0	2
H100_DRIL52.055F2_50	Plate_010	C11	H100_DRIL52.055	2	1	1	1	0	0	0	0	0	1	0	0	0	0	0	0	0	0	0	0		0	0	0	0	0	0	0	1
H100_DRIL52.055F2_51	Plate_011	E01	H100_DRIL52.055	2	0	1	2	0		0	0	0	2	0	0	0	0	0	0	0	0	0	0		0	0	0	0	0	0	0	1
H100_DRIL52.055F2_52	Plate_010	G08	H100_DRIL52.055	0	0	1	1	0		0	0	0	1	0	0	0	0	0	0	0	0	0	0		0	0	0	0	0	0	0	2
H100_DRIL52.055F2_54	Plate_010	C10	H100_DRIL52.055	2	0	1	2	0	0	0	0	0	2	0	0	0	0	0	0	0	0	0	0		0	0	0	0	0	0	0	1
H100_DRIL52.055F2_55	Plate_010	B12	H100_DRIL52.055	0	1	0	0	0	1	0	0	0	2	0	0	0	0	0	0	0	0	0	0		0	0	0	0	0	0	0	1
H100_DRIL52.055F2_56	Plate_010	D11	H100_DRIL52.055	1	1	2	2	0	0	0	0	0	1	0	0	0	0	0	0	0	0	0	0		0	0	0	0	0	0	0	0
H100_DRIL52.055F2_57	Plate_010	A11	H100_DRIL52.055	0	1	2	2	0	0	0	0	0	2	0	0	0	0	0	0	0	0	0	0		0	0	0	0	0	0	0	0
H100_DRIL52.055F2_58	Plate_010	B09	H100_DRIL52.055	2	1	2	2	0	0	0	0	0	1	0	0	0	0	0	0	0	0	0	0		0	0	0	0	0	0	0	1
H100_DRIL52.055F2_59	Plate_010	C05	H100_DRIL52.055	1	0	2	2	0	0	0	0	0	0	0	0	0	0	0	0	0	0	0	0		0	0	0	0	0	0	0	0
H100_DRIL52.055F2_6	Plate_010	F06	H100_DRIL52.055	1	2	2	2	0	0	0	0	0	0	0	0	0	0	0	0	0	0	0	0		0	0	0	0	0	0	0	1
H100_DRIL52.055F2_60	Plate_010	C12	H100_DRIL52.055	1	2	1	1	0	0	0	0	0	0	0	0	0	0	0	0	0	0	0	0		0	0	0	0	0	0	0	2
H100_DRIL52.055F2_61	Plate_010	E12	H100_DRIL52.055	0	1	1	1	0	0	0	1	0	0	0	0	0	0	1	1	1	1	0	0		1	0	0	0	1	1	0	1
H100_DRIL52.055F2_62	Plate_010	H06	H100_DRIL52.055	1	1	1	1	0	0	0	0	0	1	0	0	0	0	0	0	0	0	0	0		0	0	0	0	0	0	0	2
H100_DRIL52.055F2_63	Plate_010	F12	H100_DRIL52.055	2	2	2	2	0	0	0	0	0	1	0	0	0	0	0	0	0	0	0	0		0	0	0	0	0	0	0	2
H100_DRIL52.055F2_64	Plate_010	C09	H100_DRIL52.055	1	1	2	2	0	0	0	0	0	0	0	0	0	0	0	0	0	0	0	0		0	0	0	0	0	0	0	1
H100_DRIL52.055F2_65	Plate_010	C06	H100_DRIL52.055	0	1	0	0	0	0	0	0	0	1	0	0	0	0	0	0	0	0	0	0		0	0	0	0	0	0	0	1
H100_DRIL52.055F2_66	Plate_010	D10	H100_DRIL52.055	1	1	1	1	0	0	0	0	0	1	0	0	0	0	0	0	0	0	0	0		0	0	0	0	0	0	0	1
H100_DRIL52.055F2_67	Plate_011	C01	H100_DRIL52.055	0	0	2	2	0	0	0	0	0	1	0	0	0	0	0	0	0	0	0	0		0	0	0	0	0	0	0	1
H100_DRIL52.055F2_68	Plate_010	A12	H100_DRIL52.055	0	1	1	1	0	0	0	0	0	1	0	0	0	0	0	0	0	0	0	0		0	0	0	0	0	0	0	1
H100_DRIL52.055F2_7	Plate_010	G09	H100_DRIL52.055	1	1	2	2	0	0	0	0	0	1	0	0	0	0	0	0	0	0	0	0		0	0	0	0	0	0	0	1
H100_DRIL52.055F2_8	Plate_010	G11	H100_DRIL52.055	2	1	0	0	0	0	0	0	0	1	0	0	0	0	0	0	0	0	0	0		0	0	0	0	0	0	0	0
H100_DRIL52.055F2_9	Plate_010	D05	H100_DRIL52.055	1	1	0	0	0	0	0	0	0	2	0	0	0	0	0	0	0	0	0	0		0	0	0	0	0	0	0	0
H100_DRIL52.157F2_1	Plate_06	D03	H100_DRIL52.157	0	0	0	0	2	1	0	0	1	0	0	0	0	0	1	0	0	0	0	0		0	0	0	0	0	0	0	0
H100_DRIL52.157F2_10	Plate_07	G02	H100_DRIL52.157	0	0	0	0	0		0	0	0	0	0	0	0	0	0	0	0	0	0	0		0	0	0	0	0	0	0	0
H100_DRIL52.157F2_100	Plate_06	F09	H100_DRIL52.157	0	0	0	0	2	2	0	0	0	0	0	0	0	0	0	0	0	0	0	0		0	0	0	0	0	0	0	0
H100_DRIL52.157F2_101	Plate_06	B02	H100_DRIL52.157	0	0	0	0	2	1	0	0	0	0	0	0	0	0	0	0	0	0	0	0		0	0	0	0	0	0	0	0
H100_DRIL52.157F2_11	Plate_07	A01	H100_DRIL52.157	0	0	0	0	1	2	0	0	0	0	0	0	0	0	0	0	0	0	0	0		0	0	0	0	0	0	0	0
H100_DRIL52.157F2_12	Plate_06	G04	H100_DRIL52.157	0	0	0	0	0	1	0	0	0	0	0	0	0	0	0	0	0	0	0	0		0	0	0	0	0	0	0	0
H100_DRIL52.157F2_13	Plate_06	D10	H100_DRIL52.157	0	0	0	0	2		0	0	0	0	0	0	0	0	0	0	0	0	0	0		0	0	0	0	0	0	0	0
H100_DRIL52.157F2_14	Plate_06	E05	H100_DRIL52.157	0	0	0	0	1	0	0	0	0	0	0	0	0	0	0	0	0	0	0	0		0	0	0	0	0	0	0	0
H100_DRIL52.157F2_15	Plate_07	F02	H100_DRIL52.157	0	0	0	0	1		0	0	0	0	0	0	0	0	0	0	0	0	0	0		0	0	0	0	0	0	0	0
H100_DRIL52.157F2_16	Plate_06	A07	H100_DRIL52.157	0	0	0	0	1	1	0	0	0	0	0	0	0	0	0	0	0	0	0	0		0	0	0	0	0	0	0	0
H100_DRIL52.157F2_17	Plate_06	F12	H100_DRIL52.157	0	0	0	0	1	0		0	0	0	0	0	0	0	0	0	0	0	0	0		0	0	0	0	0	0	0	0
H100_DRIL52.157F2_18	Plate_06	A12	H100_DRIL52.157	0	0	0	0	1	1	0	0	0	0	0	0	0	0	0	0	0	0	0	0		0	0	0	0	0	0	0	0
H100_DRIL52.157F2_19	Plate_06	H04	H100_DRIL52.157	0	0	0	0	0	2	0	0	1	0	0	0	0	0	1	0	0	0	0	0		0	0	0	0	0	0	0	0
H100_DRIL52.157F2_2	Plate_06	B11	H100_DRIL52.157	0	0	0	0	0	1		0	0	0	0	0	0	0	0	0	0	0	0	0		0	0	0	0	0	0	0	0
H100_DRIL52.157F2_20	Plate_07	B02	H100_DRIL52.157	0	0	0	0	0		0	0	0	0	0	0	0	0	0	0	0	0	0	0		0	0	0	0	0	0	0	0
H100_DRIL52.157F2_21	Plate_06	F02	H100_DRIL52.157	0	0	0	0	0	1	0	0	0	0	0	0	0	0	0	0	0	0	0	0		0	0	0	0	0	0	0	0
H100_DRIL52.157F2_22	Plate_06	B12	H100_DRIL52.157	0	0	0	0	1	0	0	0	0	0	0	0	0	0	0	0	0	0	0	0		0	0	0	0	0	0	0	0
H100_DRIL52.157F2_23	Plate_07	D01	H100_DRIL52.157	0	0	0	0	2	2	0	0	1	0	0	0	0	0	1	0	0	0	0	0		0	0	0	0	0	0	0	0
H100_DRIL52.157F2_24	Plate_06	B08	H100_DRIL52.157	0	0	0	0	2	2	0	0	1	0	0	0	0	0	1	0	0	0	0	0		0	0	0	0	0	0	0	0
H100_DRIL52.157F2_25	Plate_06	H10	H100_DRIL52.157	0	0	0	0	2	0		0	0	0	0	0	0	0	0	0	0	0	0	0		0	0	0	0	0	0	0	0
H100_DRIL52.157F2_26	Plate_06	A06	H100_DRIL52.157	0	0	0	0	0	1	0	0	0	0	0	0	0	0	0	0	0	0	0	0		0	0	0	0	0	0	0	0
H100_DRIL52.157F2_27	Plate_06	H11	H100_DRIL52.157	0	0	0	0	1	0	0	0	0	0	0	0	0	0	0	0	0	0	0	0		0	0	0	0	0	0	0	0
H100_DRIL52.157F2_28	Plate_07	D02	H100_DRIL52.157	0	0	0	0	0	2	0	0	2	0	0	0	0	0	2	0	0	0	0	0		0	0	0	0	0	0	0	0
H100_DRIL52.157F2_29	Plate_06	A11	H100_DRIL52.157	0	0	0	0	1	0		0	0	0	0	0	0	0	0	0	0	0	0	0		0	0	0	0	0	0	0	0
H100_DRIL52.157F2_3	Plate_06	H07	H100_DRIL52.157	0	0	0	0	1	0		0	0	0	0	0	0	0	0	0	0	0	0	0		0	0	0	0	0	0	0	0
H100_DRIL52.157F2_30	Plate_06	F11	H100_DRIL52.157	0	0	0	0	1	2	0	0	0	0	0	0	0	0	0	0	0	0	0	0		0	0	0	0	0	0	0	0
H100_DRIL52.157F2_31	Plate_06	H03	H100_DRIL52.157	0	0	0	0	0	1	0	0	2	0	0	0	0	0	2	0	0	0	0	0		0	0	0	0	0	0	0	0
H100_DRIL52.157F2_32	Plate_06	G02	H100_DRIL52.157	0	0	0	0	1	2		0	2	0	0	0	0	0	2	0	0	0	0	0		0	0	0	0	0	0	0	0
H100_DRIL52.157F2_33	Plate_06	D09	H100_DRIL52.157	0	0	0	0	0		0	0	1	0	0	0	0	0	1	0	0	0	0	0		0	0	0	0	0	0	0	0
H100_DRIL52.157F2_34	Plate_06	B10	H100_DRIL52.157	0	0	0	0	1		0	0	0	0	0	0	0	0	0	0	0	0	0	0		0	0	0	0	0	0	0	0
H100_DRIL52.157F2_35	Plate_06	B09	H100_DRIL52.157	0	0	0	0	0	1		0	0	0	0	0	0	0	0	0	0	0	0	0		0	0	0	0	0	0	0	0
H100_DRIL52.157F2_36	Plate_06	D12	H100_DRIL52.157	0	0	0	0	0	0	0	0	0	0	0	0	0	0	0	0	0	0	0	0		0	0	0	0	0	0	0	0
H100_DRIL52.157F2_37	Plate_07	E01	H100_DRIL52.157	0	0	0	0	0		0	0	1	0	0	0	0	0	1	0	0	0	0	0		0	0	0	0	0	0	0	0
H100_DRIL52.157F2_38	Plate_06	D02	H100_DRIL52.157	0	0	0	0	2	1	0	0	0	0	0	0	0	0	0	0	0	0	0	0		0	0	0	0	0	0	0	0
H100_DRIL52.157F2_39	Plate_06	G07	H100_DRIL52.157	0	0	0	0	2	0	0	0	0	0	0	0	0	0	0	0	0	0	0	0		0	0	0	0	0	0	0	0
H100_DRIL52.157F2_4	Plate_06	B06	H100_DRIL52.157	0	0	0	0	0		0	0	0	0	0	0	0	0	0	0	0	0	0	0		0	0	0	0	0	0	0	0
H100_DRIL52.157F2_40	Plate_06	D05	H100_DRIL52.157	0	2	1	1	0	1	0	0	0	2	0	0	0	0	0	0	0	0	0	0		0	0	0	0	0	0	0	1
H100_DRIL52.157F2_41	Plate_06	F10	H100_DRIL52.157	0	0	0	0	1	1		0	2	0	0	0	0	0	2	0	0	0	0	0		0	0	0	0	0	0	0	0
H100_DRIL52.157F2_42	Plate_06	F08	H100_DRIL52.157	0	0	0	0	1	2		0	2	0	0	0	0	0	2	0	0	0	0	0		0	0	0	0	0	0	0	0
H100_DRIL52.157F2_43	Plate_07	F01	H100_DRIL52.157	0	0	0	0	1	0		0	0	0	0	0	0	0	0	0	0	0	0	0		0	0	0	0	0	0	0	0
H100_DRIL52.157F2_44	Plate_07	E02	H100_DRIL52.157	0	0	0	0	1		0	0	0	0	0	0	0	0	0	0	0	0	0	0		0	0	0	0	0	0	0	0
H100_DRIL52.157F2_45	Plate_06	E12	H100_DRIL52.157	0	0	0	0	1	1	0	0	0	0	0	0	0	0	0	0	0	0	0	0		0	0	0	0	0	0	0	0
H100_DRIL52.157F2_46	Plate_06	G09	H100_DRIL52.157	0	0	0	0	0	1	0	0	0	0	0	0	0	0	0	0	0	0	0	0		0	0	0	0	0	0	0	0
H100_DRIL52.157F2_47	Plate_06	C10	H100_DRIL52.157	0	0	0	0	2	2		0	0	0	0	0	0	0	0	0	0	0	0	0		0	0	0	0	0	0	0	0
H100_DRIL52.157F2_48	Plate_06	G08	H100_DRIL52.157	0	0	0	0	1		0	0	1	0	0	0	0	0	1	0	0	0	0	0		0	0	0	0	0	0	0	0
H100_DRIL52.157F2_49	Plate_07	G01	H100_DRIL52.157	0	0	0	0	1	0	0	0	0	0	0	0	0	0	0	0	0	0	0	0		0	0	0	0	0	0	0	0
H100_DRIL52.157F2_5	Plate_06	D06	H100_DRIL52.157	0	0	0	0	0	2		0	1	0	0	0	0	0	1	0	0	0	0	0		0	0	0	0	0	0	0	0
H100_DRIL52.157F2_50	Plate_06	E07	H100_DRIL52.157	0	1	1	1	0		0	0	0	1	0	0	0	0	0	0	0	0	0	0		0	0	0	0	0	0	0	0
H100_DRIL52.157F2_51	Plate_06	A05	H100_DRIL52.157	0	0	0	0	1	1	0	0	0	0	0	0	0	0	0	0	0	0	0	0		0	0	0	0	0	0	0	0
H100_DRIL52.157F2_52	Plate_06	A04	H100_DRIL52.157	0	0	0	0	2	1	0	0	0	0	0	0	0	0	0	0	0	0	0	0		0	0	0	0	0	0	0	0
H100_DRIL52.157F2_53	Plate_06	C04	H100_DRIL52.157	0	0	0	0	1	1		0	0	0	0	0	0	0	0	0	0	0	0	0		0	0	0	0	0	0	0	0
H100_DRIL52.157F2_54	Plate_06	A02	H100_DRIL52.157	0	0	0	0	2	1	0	0	0	0	0	0	0	0	0	0	0	0	0	0		0	0	0	0	0	0	0	0
H100_DRIL52.157F2_55	Plate_06	C09	H100_DRIL52.157	0	0	0	0	2			0	0	0	0	0	0	0	0	0	0	0	0	0		0	0	0	0	0	0	0	0
H100_DRIL52.157F2_56	Plate_06	G05	H100_DRIL52.157	0	0	0	0	0			0	1	0	0	0	0	0	1	0	0	0	0	0		0	0	0	0	0	0	0	0
H100_DRIL52.157F2_57	Plate_06	G10	H100_DRIL52.157	0	0	0	0	1		0	0	0	0	0	0	0	0	0	0	0	0	0	0		0	0	0	0	0	0	0	0
H100_DRIL52.157F2_58	Plate_06	C07	H100_DRIL52.157	0	0	0	0	2	0	0	0	0	0	0	0	0	0	0	0	0	0	0	0		0	0	0	0	0	0	0	0
H100_DRIL52.157F2_59	Plate_06	A08	H100_DRIL52.157	0	0	0	0	1	0	0	0	0	0	0	0	0	0	0	0	0	0	0	0		0	0	0	0	0	0	0	0
H100_DRIL52.157F2_6	Plate_06	H02	H100_DRIL52.157	0	0	0	0	1	0		0	0	0	0	0	0	0	0	0	0	0	0	0		0	0	0	0	0	0	0	0
H100_DRIL52.157F2_60	Plate_06	D11	H100_DRIL52.157	0	0	0	0	1	0		0	0	0	0	0	0	0	0	0	0	0	0	0		0	0	0	0	0	0	0	0
H100_DRIL52.157F2_61	Plate_06	B03	H100_DRIL52.157	0	0	0	0	2	0		0	0	0	0	0	0	0	0	0	0	0	0	0		0	0	0	0	0	0	0	0
H100_DRIL52.157F2_62	Plate_06	G03	H100_DRIL52.157	0	0	0	0	2	2		0	2	0	0	0	0	0	2	0	0	0	0	0		0	0	0	0	0	0	0	0
H100_DRIL52.157F2_63	Plate_07	B01	H100_DRIL52.157	0	0	0	0	0		0	0	0	0	0	0	0	0	0	0	0	0	0	0		0	0	0	0	0	0	0	0
H100_DRIL52.157F2_64	Plate_06	F04	H100_DRIL52.157	0	0	0	0	1	1	1	0	0	0	0	0	0	0	0	0	0	0	0	0		0	0	0	0	0	0	0	0
H100_DRIL52.157F2_65	Plate_06	C05	H100_DRIL52.157	0	0	0	0	1	2	0	0	2	0	0	0	0	0	2	0	0	0	0	0		0	0	0	0	0	0	0	0
H100_DRIL52.157F2_66	Plate_06	H06	H100_DRIL52.157	0	0	0	0	0		0	0	0	0	0	0	0	0	0	0	0	0	0	0		0	0	0	0	0	0	0	0
H100_DRIL52.157F2_67	Plate_06	E06	H100_DRIL52.157	0	0	0	0	1	1	0	0	1	0	0	0	0	0	1	0	0	0	0	0		0	0	0	0	0	0	0	0
H100_DRIL52.157F2_68	Plate_06	F03	H100_DRIL52.157	0	0	0	0	1		0	0	0	0	0	0	0	0	0	0	0	0	0	0		0	0	0	0	0	0	0	0
H100_DRIL52.157F2_69	Plate_06	D07	H100_DRIL52.157	0	0	0	0	1		0	0	0	0	0	0	0	0	0	0	0	0	0	0		0	0	0	0	0	0	0	0
H100_DRIL52.157F2_7	Plate_06	D08	H100_DRIL52.157	0	0	0	0	1		0	0	0	0	0	0	0	0	0	0	0	0	0	0		0	0	0	0	0	0	0	0
H100_DRIL52.157F2_70	Plate_07	C01	H100_DRIL52.157	0	0	0	0	1	1	0	0	0	0	0	0	0	0	0	0	0	0	0	0		0	0	0	0	0	0	0	0
H100_DRIL52.157F2_71	Plate_06	F06	H100_DRIL52.157	0	0	0	0	1	1	0	0	0	0	0	0	0	0	0	0	0	0	0	0		0	0	0	0	0	0	0	0
H100_DRIL52.157F2_72	Plate_06	B07	H100_DRIL52.157	0	0	0	0	1	1		0	0	0	0	0	0	0	0	0	0	0	0	0		0	0	0	0	0	0	0	0
H100_DRIL52.157F2_73	Plate_06	H08	H100_DRIL52.157	0	0	0	0	1	2		0	0	0	0	0	0	0	0	0	0	0	0	0		0	0	0	0	0	0	0	0
H100_DRIL52.157F2_74	Plate_06	B05	H100_DRIL52.157	0	0	0	0	0	0	0	0	2	0	0	0	0	0	2	0	0	0	0	0		0	0	0	0	0	0	0	0
H100_DRIL52.157F2_75	Plate_06	A10	H100_DRIL52.157	0	0	0	0	1		0	0	0	0	0	0	0	0	0	0	0	0	0	0		0	0	0	0	0	0	0	0
H100_DRIL52.157F2_76	Plate_06	A09	H100_DRIL52.157	0	0	0	0	1		0	0	0	0	0	0	0	0	0	0	0	0	0	0		0	0	0	0	0	0	0	0
H100_DRIL52.157F2_77	Plate_06	F05	H100_DRIL52.157	0	0	0	0	1	0	0	0	0	0	0	0	0	0	0	0	0	0	0	0		0	0	0	0	0	0	0	0
H100_DRIL52.157F2_78	Plate_06	H05	H100_DRIL52.157	0	0	0	0	2	2	0	0	2	0	0	0	0	0	2	0	0	0	0	0		0	0	0	0	0	0	0	0
H100_DRIL52.157F2_79	Plate_06	E09	H100_DRIL52.157	0	0	0	0	0		0	0	1	0	0	0	0	0	1	0	0	0	0	0		0	0	0	0	0	0	0	0
H100_DRIL52.157F2_8	Plate_06	A03	H100_DRIL52.157	0	0	0	0	1	1		0	0	0	0	0	0	0	0	0	0	0	0	0		0	0	0	0	0	0	0	0
H100_DRIL52.157F2_80	Plate_06	E11	H100_DRIL52.157	0	0	0	0	0		0	0	0	0	0	0	0	0	0	0	0	0	0	0		0	0	0	0	0	0	0	0
H100_DRIL52.157F2_81	Plate_06	C12	H100_DRIL52.157	0	0	0	0	1	1	0	0	0	0	0	0	0	0	0	0	0	0	0	0		0	0	0	0	0	0	0	0
H100_DRIL52.157F2_82	Plate_06	H09	H100_DRIL52.157	0	0	0	0	1	0	0	0	0	0	0	0	0	0	0	0	0	0	0	0		0	0	0	0	0	0	0	0
H100_DRIL52.157F2_83	Plate_06	C03	H100_DRIL52.157	0	0	0	0	2	2	0	0	1	0	0	0	0	0	1	0	0	0	0	0		0	0	0	0	0	0	0	0
H100_DRIL52.157F2_84	Plate_07	H02	H100_DRIL52.157	0	0	0	0	0		0	0	0	0	0	0	0	0	0	0	0	0	0	0		0	0	0	0	0	0	0	0
H100_DRIL52.157F2_85	Plate_06	E10	H100_DRIL52.157	0	0	0	0	2	1		0	0	0	0	0	0	0	0	0	0	0	0	0		0	0	0	0	0	0	0	0
H100_DRIL52.157F2_86	Plate_07	A02	H100_DRIL52.157	0	0	0	0	0		0	0	0	0	0	0	0	0	0	0	0	0	0	0		0	0	0	0	0	0	0	0
H100_DRIL52.157F2_87	Plate_06	D04	H100_DRIL52.157	0	0	0	0	1	1	0	0	0	0	0	0	0	0	0	0	0	0	0	0		0	0	0	0	0	0	0	0
H100_DRIL52.157F2_88	Plate_07	H01	H100_DRIL52.157	0	0	0	0	1		0	0	0	0	0	0	0	0	0	0	0	0	0	0		0	0	0	0	0	0	0	0
H100_DRIL52.157F2_89	Plate_06	G06	H100_DRIL52.157	0	0	0	0	1	0	0	0	1	0	0	0	0	0	2	0	0	0	0	0		0	0	0	0	0	0	0	0
H100_DRIL52.157F2_9	Plate_06	C11	H100_DRIL52.157	0	0	0	0	0	1	0	0	1	0	0	0	0	0	1	0	0	0	0	0		0	0	0	0	0	0	0	0
H100_DRIL52.157F2_90	Plate_06	E02	H100_DRIL52.157	0	0	0	0	1	1	0	0	0	0	0	0	0	0	0	0	0	0	0	0		0	0	0	0	0	0	0	0
H100_DRIL52.157F2_91	Plate_06	B04	H100_DRIL52.157	0	0	0	0	1	1	0	0	0	0	0	0	0	0	0	0	0	0	0	0		0	0	0	0	0	0	0	0
H100_DRIL52.157F2_92	Plate_06	C08	H100_DRIL52.157	0	0	0	0	2	1		0	0	0	0	0	0	0	0	0	0	0	0	0		0	0	0	0	0	0	0	0
H100_DRIL52.157F2_93	Plate_06	F07	H100_DRIL52.157	0	0	0	0	1		0	0	0	0	0	0	0	0	0	0	0	0	0	0		0	0	0	0	0	0	0	0
H100_DRIL52.157F2_94	Plate_06	G11	H100_DRIL52.157	0	0	0	0	1		0	0	1	0	0	0	0	0	1	0	0	0	0	0		0	0	0	0	0	0	0	0
H100_DRIL52.157F2_95	Plate_06	E08	H100_DRIL52.157	0	0	0	0	1		0	0	1	0	0	0	0	0	1	0	0	0	0	0		0	0	0	0	0	0	0	0
H100_DRIL52.157F2_96	Plate_06	C06	H100_DRIL52.157	0	0	0	0	0	2	0	0	0	0	0	0	0	0	0	0	0	0	0	0		0	0	0	0	0	0	0	0
H100_DRIL52.157F2_97	Plate_07	C02	H100_DRIL52.157	0	0	0	0	2	0	0	0	0	0	0	0	0	0	0	0	0	0	0	0		0	0	0	0	0	0	0	0
H100_DRIL52.157F2_98	Plate_06	E03	H100_DRIL52.157	0	0	0	0	2	1	0	0	1	0	0	0	0	0	1	0	0	0	0	0		0	0	0	0	0	0	0	0
H100_DRIL52.157F2_99	Plate_06	E04	H100_DRIL52.157	0	0	0	0	2	2	0	0	2	0	0	0	0	0	2	0	0	0	0	0		0	0	0	0	0	0	0	0
H100_DRIL52.268F2_1	Plate_09	B02	H100_DRIL52.268	2	0	0	0	0	0	0	1	1	0	0	0	0	0	1	0	2	0	0	0		0	0	0	0	0	0	0	0
H100_DRIL52.268F2_10	Plate_09	E07	H100_DRIL52.268	0	0	0	0	0		0	2	1	0	0	0	0	0	1	0	2	0	0	0		0	0	0	0	0	0	0	0
H100_DRIL52.268F2_11	Plate_09	H02	H100_DRIL52.268	1	0	0	0	0	0	0	0	0	0	0	0	0	0	0	0	0	0	0	0		0	0	0	0	0	0	0	0
H100_DRIL52.268F2_12	Plate_08	G10	H100_DRIL52.268	2	0	0	0	0	0	0	1	1	0	0	0	0	0	1	0	0	0	0	0		0	0	0	0	0	0	0	0
H100_DRIL52.268F2_13	Plate_08	G11	H100_DRIL52.268	2	0	0	0	0	0	0	2	2	0	0	0	0	0	2	0	2	0	0	0		0	0	0	0	0	0	0	0
H100_DRIL52.268F2_14	Plate_09	E02	H100_DRIL52.268	0	0	0	0	0	0	0	1	1	0	0	0	0	0	1	0	1	0	0	0		0	0	0	0	0	0	0	0
H100_DRIL52.268F2_15	Plate_09	E04	H100_DRIL52.268	1	0	0	0	0		0	2	0	0	0	0	0	0	0	0	2	0	0	0		0	0	0	0	0	0	0	0
H100_DRIL52.268F2_16	Plate_08	C11	H100_DRIL52.268	0	0	0	0	0	0		1	2	0	0	0	0	0	2	0	0	0	0	0		0	0	0	0	0	0	0	0
H100_DRIL52.268F2_17	Plate_09	C06	H100_DRIL52.268	1	0	0	0	0	0	0	0	0	0	0	0	0	0	0	0	0	0	0	0		0	0	0	0	0	0	0	0
H100_DRIL52.268F2_18	Plate_09	G04	H100_DRIL52.268	1	0	0	0	0	0	0	1	1	0	0	0	0	0	1	0	1	0	0	0		0	0	0	0	0	0	0	0
H100_DRIL52.268F2_19	Plate_09	C07	H100_DRIL52.268	1	0	0	0	0	0	0	1	0	0	0	0	0	0	0	0	2	0	0	0		0	0	0	0	0	0	0	0
H100_DRIL52.268F2_2	Plate_09	E06	H100_DRIL52.268	1	0	0	0	0	0	0	1	0	0	0	0	0	0	0	0	1	0	0	0		0	0	0	0	0	0	0	0
H100_DRIL52.268F2_20	Plate_09	D04	H100_DRIL52.268	2	0	0	0	0		0	1	1	0	0	0	0	0	1	0	0	0	0	0		0	0	0	0	0	0	0	0
H100_DRIL52.268F2_21	Plate_08	E10	H100_DRIL52.268	2	0	0	0	0		0	0	1	0	0	0	0	0	1	0	1	0	0	0		0	0	0	0	0	0	0	0
H100_DRIL52.268F2_22	Plate_09	F07	H100_DRIL52.268	0	0	0	0	0			1	2	0	0	0	0	0	2	0	2	0	0	0		0	0	0	0	0	0	0	0
H100_DRIL52.268F2_23	Plate_09	D06	H100_DRIL52.268	1	0	0	0	0	0	0	0	1	0	0	0	0	0	1	0	1	0	0	0		0	0	0	0	0	0	0	0
H100_DRIL52.268F2_24	Plate_09	F05	H100_DRIL52.268	0	0	0	0	0		0	1	2	0	0	0	0	0	2	0	2	0	0	0		0	0	0	0	0	0	0	0
H100_DRIL52.268F2_25	Plate_09	B03	H100_DRIL52.268	1	0	0	0	0		0	2	2	0	0	0	0	0	2	0	2	0	0	0		0	0	0	0	0	0	0	0
H100_DRIL52.268F2_26	Plate_09	A05	H100_DRIL52.268	0	0	0	0	0	0	0	1	2	0	0	0	0	0	2	0	2	0	0	0		0	0	0	0	0	0	0	0
H100_DRIL52.268F2_27	Plate_08	H11	H100_DRIL52.268	1	0	0	0	0		0	1	1	0	0	0	0	0	1	0	2	0	0	0		0	0	0	0	0	0	0	0
H100_DRIL52.268F2_28	Plate_08	A11	H100_DRIL52.268	0	0	0	0	0	0	0	0	1	0	0	0	0	0	1	0	1	0	0	0		0	0	0	0	0	0	0	0
H100_DRIL52.268F2_29	Plate_09	F02	H100_DRIL52.268	0	0	0	0	0		0	0	1	0	0	0	0	0	1	0	1	0	0	0		0	0	0	0	0	0	0	0
H100_DRIL52.268F2_3	Plate_08	A12	H100_DRIL52.268	1	0	0	0	0	0		1	2	0	0	0	0	0	2	0	2	0	0	0		0	0	0	0	0	0	0	0
H100_DRIL52.268F2_30	Plate_08	D11	H100_DRIL52.268	1	0	0	0	0	0	0	0	1	0	0	0	0	0	1	0	1	0	0	0		0	0	0	0	0	0	0	0
H100_DRIL52.268F2_31	Plate_08	D12	H100_DRIL52.268	1	0	0	0	0	0	0	1	1	0	0	0	0	0	1	0	1	0	0	0		0	0	0	0	0	0	0	0
H100_DRIL52.268F2_32	Plate_09	B07	H100_DRIL52.268	0	0	0	0	0	0		1	2	0	0	0	0	0	2	0	0	0	0	0		0	0	0	0	0	0	0	0
H100_DRIL52.268F2_33	Plate_09	G03	H100_DRIL52.268	1	0	0	0	0	0	0	1	1	0	0	0	0	0	1	0	1	0	0	0		0	0	0	0	0	0	0	0
H100_DRIL52.268F2_34	Plate_09	A01	H100_DRIL52.268	0	0	0	0	0	0	0	1	2	0	0	0	0	0	2	0	1	0	0	0		0	0	0	0	0	0	0	0
H100_DRIL52.268F2_35	Plate_08	C12	H100_DRIL52.268	1	0	0	0	0	0	0	0	0	0	0	0	0	0	0	0	0	0	0	0		0	0	0	0	0	0	0	0
H100_DRIL52.268F2_36	Plate_08	F10	H100_DRIL52.268	2	0	0	0	0	0	0	2	1	0	0	0	0	0	1	0	1	0	0	0		0	0	0	0	0	0	0	0
H100_DRIL52.268F2_37	Plate_09	C05	H100_DRIL52.268	1	0	0	0	0		0	2	1	0	0	0	0	0	1	0	1	0	0	0		0	0	0	0	0	0	0	0
H100_DRIL52.268F2_38	Plate_09	C01	H100_DRIL52.268	2	0	0	0	0		0	0	0	0	0	0	0	0	0	0	1	0	0	0		0	0	0	0	0	0	0	0
H100_DRIL52.268F2_39	Plate_09	H06	H100_DRIL52.268	2	0	0	0	0	0	0	1	1	0	0	0	0	0	1	0	1	0	0	0		0	0	0	0	0	0	0	0
H100_DRIL52.268F2_4	Plate_08	H10	H100_DRIL52.268	1	0	0	0	0	0		1	2	0	0	0	0	0	1	0	0	0	0	0		0	0	0	0	0	0	0	0
H100_DRIL52.268F2_40	Plate_09	D08	H100_DRIL52.268	2	0	0	0	0	0	0	2	1	0	0	0	0	0	1	0	1	0	0	0		0	0	0	0	0	0	0	0
H100_DRIL52.268F2_41	Plate_08	E11	H100_DRIL52.268	2	0	0	0	0		0	0	1	0	0	0	0	0	1	0	1	0	0	0		0	0	0	0	0	0	0	0
H100_DRIL52.268F2_42	Plate_09	F03	H100_DRIL52.268	1	0	0	0	0	0	0	1	1	0	0	0	0	0	1	0	1	0	0	0		0	0	0	0	0	0	0	0
H100_DRIL52.268F2_43	Plate_09	A02	H100_DRIL52.268	2	0	0	0	0	0	0	0	1	0	0	0	0	0	1	0	1	0	0	0		0	0	0	0	0	0	0	0
H100_DRIL52.268F2_44	Plate_09	D01	H100_DRIL52.268	2	0	0	0	0	0	0	1	1	0	0	0	0	0	1	0	2	0	0	0		0	0	0	0	0	0	0	0
H100_DRIL52.268F2_45	Plate_08	E12	H100_DRIL52.268	1	0	0	0	0	1	0	2	0	0	0	0	0	0	0	0	1	0	0	0		0	0	0	0	0	0	0	0
H100_DRIL52.268F2_46	Plate_09	G02	H100_DRIL52.268	1	0	0	0	0	0	0	1	2	0	0	0	0	0	2	0	1	0	0	0		0	0	0	0	0	0	0	0
H100_DRIL52.268F2_47	Plate_09	F04	H100_DRIL52.268	0	0	0	0	0	0		1	1	0	0	0	0	0	1	0	2	0	0	0		0	0	0	0	0	0	0	0
H100_DRIL52.268F2_48	Plate_09	B04	H100_DRIL52.268	1	0	0	0	0	0	0	0	1	0	0	0	0	0	1	0	1	0	0	0		0	0	0	0	0	0	0	0
H100_DRIL52.268F2_49	Plate_09	F01	H100_DRIL52.268	2	0	0	0	0	0	0	1	1	0	0	0	0	0	1	0	1	0	0	0		0	0	0	0	0	0	0	0
H100_DRIL52.268F2_5	Plate_09	G06	H100_DRIL52.268	1	0	0	0	0	0	0	0	1	0	0	0	0	0	1	0	2	0	0	0		0	0	0	0	0	0	0	0
H100_DRIL52.268F2_50	Plate_09	B08	H100_DRIL52.268	0	0	0	0	0	0	0	1	0	0	0	0	0	0	0	0	2	0	0	0		0	0	0	0	0	0	0	0
H100_DRIL52.268F2_51	Plate_08	B11	H100_DRIL52.268	1	0	0	0	0	0	0	2	1	0	0	0	0	0	1	0	0	0	0	0		0	0	0	0	0	0	0	0
H100_DRIL52.268F2_53	Plate_09	C03	H100_DRIL52.268	0	0	0	0	0	0	0	2	1	0	0	0	0	0	1	0	1	0	0	0		0	0	0	0	0	0	0	0
H100_DRIL52.268F2_54	Plate_09	G07	H100_DRIL52.268	0	0	0	0	0	0		2	2	0	0	0	0	0	2	0	0	0	0	0		0	0	0	0	0	0	0	0
H100_DRIL52.268F2_55	Plate_09	C02	H100_DRIL52.268	0	0	0	0	0		0	2	2	0	0	0	0	0	2	0	0	0	0	0		0	0	0	0	0	0	0	0
H100_DRIL52.268F2_56	Plate_09	C04	H100_DRIL52.268	0	0	0	0	0	0	0	1	1	0	0	0	0	0	1	0	0	0	0	0		0	0	0	0	0	0	0	0
H100_DRIL52.268F2_57	Plate_09	E05	H100_DRIL52.268	0	0	0	0	1		0	0	0	0	0	0	0	0	0	0	0	0	0	0		0	0	0	0	0	0	0	0
H100_DRIL52.268F2_58	Plate_09	D07	H100_DRIL52.268	2	0	0	0	0	0	0	0	1	0	0	0	0	0	1	0	0	0	0	0		0	0	0	0	0	0	0	0
H100_DRIL52.268F2_59	Plate_09	D02	H100_DRIL52.268	0	0	0	0	0		0	0	2	0	0	0	0	0	2	0	1	0	0	0		0	0	0	0	0	0	0	0
H100_DRIL52.268F2_6	Plate_09	E01	H100_DRIL52.268	0	0	0	0	0	0	0	1	0	0	0	0	0	0	0	0	2	0	0	0		0	0	0	0	0	0	0	0
H100_DRIL52.268F2_60	Plate_09	H07	H100_DRIL52.268	2	0	0	0	0	0	0	2	1	0	0	0	0	0	1	0	1	0	0	0		0	0	0	0	0	0	0	0
H100_DRIL52.268F2_61	Plate_09	H01	H100_DRIL52.268	1	0	0	0	0	0	0	2	1	0	0	0	0	0	1	0	1	0	0	0		0	0	0	0	0	0	0	0
H100_DRIL52.268F2_62	Plate_09	G01	H100_DRIL52.268	1	0	0	0	0		0	0	1	0	0	0	0	0	1	0	2	0	0	0		0	0	0	0	0	0	0	0
H100_DRIL52.268F2_63	Plate_09	H05	H100_DRIL52.268	1	0	0	0	0	0	0	0	1	0	0	0	0	0	1	0	2	0	0	0		0	0	0	0	0	0	0	0
H100_DRIL52.268F2_64	Plate_09	E03	H100_DRIL52.268	0	0	0	0	0	0	0	0	1	0	0	0	0	0	1	0	2	0	0	0		0	0	0	0	0	0	0	0
H100_DRIL52.268F2_65	Plate_09	A03	H100_DRIL52.268	2	0	0	0	0			0	1	0		0	0	0	1	0	0	0	0	0		0	0	0	0	0		0	0
H100_DRIL52.268F2_66	Plate_09	B05	H100_DRIL52.268	0	0	0	0	0	0	0	0	1	0	0	0	0	0	1	0	0	0	0	0		0	0	0	0	0	0	0	0
H100_DRIL52.268F2_67	Plate_09	A06	H100_DRIL52.268	0	0	0	0	0	0	0	0	1	0	0	0	0	0	1	0	1	0	0	0		0	0	0	0	0	0	0	0
H100_DRIL52.268F2_68	Plate_08	B12	H100_DRIL52.268	2	0	0	0	0	0	0	1	1	0	0	0	0	0	1	0	1	0	0	0		0	0	0	0	0	0	0	0
H100_DRIL52.268F2_69	Plate_09	D03	H100_DRIL52.268	1	0	0	0	0		1	1	2	0	0	0	0	0	2	0	2	0	0	0		0	0	0	0	0	0	0	0
H100_DRIL52.268F2_7	Plate_09	B06	H100_DRIL52.268	2	0	0	0	0		0	1	1	0	0	0	0	0	1	0	1	0	0	0		0	0	0	0	0	0	0	0
H100_DRIL52.268F2_70	Plate_09	A08	H100_DRIL52.268	0	0	0	0	0	0		0	2	0	0	0	0	0	2	0	1	0	0	0		0	0	0	0	0	0	0	0
H100_DRIL52.268F2_71	Plate_09	F06	H100_DRIL52.268	1	0	0	0	0	0		1	2	0	0	0	0	0	2	0	2	0	0	0		0	0	0	0	0	0	0	0
H100_DRIL52.268F2_72	Plate_09	A04	H100_DRIL52.268	2	0	0	0	0	0		2	2	0	0	0	0	0	2	0	1	0	0	0		0	0	0	0	0	0	0	0
H100_DRIL52.268F2_73	Plate_09	G05	H100_DRIL52.268	1	0	0	0	0	0	0	1	1	0	0	0	0	0	1	0	0	0	0	0		0	0	0	0	0	0	0	0
H100_DRIL52.268F2_74	Plate_09	H04	H100_DRIL52.268	0	0	0	0	0	0	0	0	1	0	0	0	0	0	1	0	2	0	0	0		0	0	0	0	0	0	0	0
H100_DRIL52.268F2_75	Plate_09	B01	H100_DRIL52.268	1	0	0	0	0	0	0	1	1	0	0	0	0	0	2	0	1	0	0	0		0	0	0	0	0	0	0	0
H100_DRIL52.268F2_76	Plate_08	F12	H100_DRIL52.268	1	0	0	0	0	0	0	0	1	0	0	0	0	0	1	0	2	0	0	0		0	0	0	0	0	0	0	0
H100_DRIL52.268F2_77	Plate_09	C08	H100_DRIL52.268	0	0	0	0	0		0	2	2	0	0	0	0	0	2	0	0	0	0	0		0	0	0	0	0	0	0	0
H100_DRIL52.268F2_8	Plate_08	F11	H100_DRIL52.268	2	0	0	0	0		0	0	2	0	0	0	0	0	2	0	1	0	0	0		0	0	0	0	0	0	0	0
H100_DRIL52.268F2_9	Plate_09	D05	H100_DRIL52.268	2	0	0	0	0	0	0	2	1	0	0	0	0	0	1	0	1	0	0	0		0	0	0	0	0	0	0	0
H100_DRIL62.030F2_10	Plate_04	B06	H100_DRIL62.030	0	0	0	0	0		0	0	0	1	0	0	0	0	0	0	0	0	0	0		0	0	0	0	0	0	0	0
H100_DRIL62.030F2_11	Plate_04	G05	H100_DRIL62.030	0	0	0	0	0	0	0	0	0	0	0	0	0	0	0	0	0	0	0	0		0	0	0	0	0	0	0	0
H100_DRIL62.030F2_12	Plate_04	C04	H100_DRIL62.030	0	0	0	0	0		0	0	0	1	0	0	0	0	0	0	0	0	0	0		0	0	0	0	0	0	0	0
H100_DRIL62.030F2_13	Plate_04	B04	H100_DRIL62.030	0	0	0	0	0		0	0	0	0	0	0	0	0	0	0	0	0	0	0		0	0	0	0	1	0	0	0
H100_DRIL62.030F2_14	Plate_04	C05	H100_DRIL62.030	1	0	0	0	0			1	2	0		0	0	0	2	0	2	0	0	0		0	0	0	0	0		0	0
H100_DRIL62.030F2_15	Plate_04	D06	H100_DRIL62.030	0	0	0	0	0	0	0	0	0	0	0	0	0	0	0	0	0	0	0	0		0	0	0	0	1	0	0	0
H100_DRIL62.030F2_18	Plate_04	E02	H100_DRIL62.030	0	0	0	0	0	0	0	0	0	1	0	0	0	0	0	0	0	0	0	0		0	0	0	0	1	0	0	0
H100_DRIL62.030F2_19	Plate_04	F02	H100_DRIL62.030	0	0	0	0	0	0	0	0	0	0	0	0	0	0	0	0	0	0	0	0		0	0	0	0	2	0	0	0
H100_DRIL62.030F2_20	Plate_04	E06	H100_DRIL62.030	0	0	0	0	0	0	0	0	0	1	0	0	0	0	0	0	0	0	0	0		0	0	0	0	1	0	0	0
H100_DRIL62.030F2_21	Plate_04	G02	H100_DRIL62.030	0	0	0	0	0		0	0	0	1		0	0	0	0	0	0	0	0	0		0	0	0	0	0		0	0
H100_DRIL62.030F2_22	Plate_04	G04	H100_DRIL62.030	0	0	0	0	0	0	0	0	0	0	0	0	0	0	0	0	0	0	0	0		0	0	0	0	1	0	0	0
H100_DRIL62.030F2_23	Plate_04	D03	H100_DRIL62.030	0	0	0	0	0	0	0	0	0	2	0	0	0	0	0	0	0	0	0	0		0	0	0	0	1	0	0	0
H100_DRIL62.030F2_24	Plate_04	H03	H100_DRIL62.030	0	0	0	0	0	0	0	0	0	1	0	0	0	0	0	0	0	0	0	0		0	0	0	0	0	0	0	0
H100_DRIL62.030F2_25	Plate_04	C06	H100_DRIL62.030	0	0	0	0	0	0	0	0	0	0	0	0	0	0	0	0	0	0	0	0		0	0	0	0	1	0	0	0
H100_DRIL62.030F2_26	Plate_04	F04	H100_DRIL62.030	0	0	0	0	0		0	0	0	1	0	0	0	0	0	0	0	0	0	0		0	0	0	0	1	0	0	0
H100_DRIL62.030F2_27	Plate_04	H04	H100_DRIL62.030	0	0	0	0	0	0	0	0	0	2	0	0	0	0	0	0	0	0	0	0		0	0	0	0	1	0	0	0
H100_DRIL62.030F2_28	Plate_04	D05	H100_DRIL62.030	0	0	0	0	0		0	0	0	2	0	0	0	0	0	0	0	0	0	0		0	0	0	0	1	0	0	0
H100_DRIL62.030F2_29	Plate_04	H05	H100_DRIL62.030	0	0	0	0	0	0	0	0	0	1	0	0	0	0	0	0	0	0	0	0		0	0	0	0	1	0	0	0
H100_DRIL62.030F2_3	Plate_04	C03	H100_DRIL62.030	0	0	0	0	0		0	0	0	1	0	0	0	0	0	0	0	0	0	0		0	0	0	0	0	0	0	0
H100_DRIL62.030F2_4	Plate_04	B03	H100_DRIL62.030	0	0	0	0	0		0	0	0	0	0	0	0	0	0	0	0	0	0	0		0	0	0	0	1	0	0	0
H100_DRIL62.030F2_42	Plate_04	F06	H100_DRIL62.030	0	0	0	0	0	0	0	0	0	0	0	0	0	0	0	0	0	0	0	0		0	0	0	0	1	0	0	0
H100_DRIL62.030F2_43	Plate_04	G03	H100_DRIL62.030	0	0	0	0	0	0	0	0	0	1	0	0	0	0	0	0	0	0	0	0		0	0	0	0	1	0	0	0
H100_DRIL62.030F2_44	Plate_04	F05	H100_DRIL62.030	0	0	0	0	0		0	0	0	1	0	0	0	0	0	0	0	0	0	0		0	0	0	0	2	0	0	0
H100_DRIL62.030F2_45	Plate_04	E03	H100_DRIL62.030	0	0	0	0	0	0	0	0	0	0	0	0	0	0	0	0	0	0	0	0		0	0	0	0	1	0	0	0
H100_DRIL62.030F2_46	Plate_04	H02	H100_DRIL62.030	0	0	0	0	0	0	0	0	0	1	0	0	0	0	0	0	0	0	0	0		0	0	0	0	0	0	0	0
H100_DRIL62.030F2_47	Plate_04	A05	H100_DRIL62.030	0	0	0	0	0	0	0	0	0	0	0	0	0	0	0	0	0	0	0	0		0	0	0	0	1	0	0	0
H100_DRIL62.030F2_48	Plate_04	D04	H100_DRIL62.030	0	0	0	0	0	0	0	0	0	0	0	0	0	0	0	0	0	0	0	0		0	0	0	0	0	0	0	0
H100_DRIL62.030F2_49	Plate_04	A03	H100_DRIL62.030	0	0	0	0	0		0	0	0	1	0	0	0	0	0	0	0	0	0	0		0	0	0	0	1	0	0	0
H100_DRIL62.030F2_5	Plate_04	B05	H100_DRIL62.030	0	0	0	0	0		0	0	0	0	0	0	0	0	0	0	0	0	0	0		0	0	0	0	1	0	0	0
H100_DRIL62.030F2_6	Plate_04	A04	H100_DRIL62.030	0	0	0	0	0	0	0	0	0	1	0	0	0	0	0	0	0	0	0	0		0	0	0	0	0	0	0	0
H100_DRIL62.030F2_7	Plate_04	F03	H100_DRIL62.030	0	0	0	0	0	0	0	0	0	1	0	0	0	0	0	0	0	0	0	0		0	0	0	0	1	0	0	0
H100_DRIL62.030F2_8	Plate_04	E05	H100_DRIL62.030	0	0	0	0	0	0	0	0	0	1	0	0	0	0	0	0	0	0	0	0		0	0	0	0	0	0	0	0
H100_DRIL62.030F2_9	Plate_04	E04	H100_DRIL62.030	0	0	0	0	0		0	0	0	1	0	0	0	0	0	0	0	0	0	0		0	0	0	0	0	0	0	0
H100_DRIL62.078F2_1	Plate_07	H06	H100_DRIL62.078	0	0	0	0	0	0	0	0	0	0	1	2	0	0	0	0	0	0	0	0		0	0	0	0	0	0	1	0
H100_DRIL62.078F2_10	Plate_07	G06	H100_DRIL62.078	0	0	0	0	0		0	0	0	0	1	1	0	0	0	0	0	0	0	0		0	0	0	0	0	0	1	0
H100_DRIL62.078F2_11	Plate_07	C07	H100_DRIL62.078	0	0	0	0	0	0	0	0	0	0	1	1	1	0	0	0	0	0	0	0		0	0	0	0	0	0	1	0
H100_DRIL62.078F2_12	Plate_08	B01	H100_DRIL62.078	0	0	0	0	0		0	0	0	0	1	1	1	0	0	0	0	0	0	0		0	0	0	0	0	0	1	0
H100_DRIL62.078F2_13	Plate_07	G08	H100_DRIL62.078	0	0	0	0	0	0	0	0	0	0	0	0	2	0	0	0	0	0	0	0		0	0	0	0	0	0	0	0
H100_DRIL62.078F2_14	Plate_07	A10	H100_DRIL62.078	0	0	0	0	0	0	0	0	0	0	1	1	1	0	0	0	0	0	0	0		0	0	0	0	0	0	1	0
H100_DRIL62.078F2_15	Plate_07	F11	H100_DRIL62.078	0	0	0	0	0		0	0	0	0	0	0	1	0	0	0	0	0	0	0		0	0	0	0	0	0	0	0
H100_DRIL62.078F2_16	Plate_07	E06	H100_DRIL62.078	0	0	0	0	0	0	0	0	0	0	1	1	2	0	0	0	0	0	0	0		0	0	0	0	0	0	1	0
H100_DRIL62.078F2_17	Plate_07	G03	H100_DRIL62.078	0	0	0	0	0		0	0	0	0	0	0	0	0	0	0	0	0	0	0		0	0	0	0	0	0	0	0
H100_DRIL62.078F2_18	Plate_07	D03	H100_DRIL62.078	0	0	0	0	0	0	0	0	0	0	1	1	2	0	0	0	0	0	0	0		0	0	0	0	0	0	1	0
H100_DRIL62.078F2_19	Plate_07	C03	H100_DRIL62.078	0	0	0	0	0		0	0	0	0	2	2	1	0	0	0	0	0	0	0		0	0	0	0	0	0	2	0
H100_DRIL62.078F2_2	Plate_07	D12	H100_DRIL62.078	0	0	0	0	0	0	0	0	0	0	1	0	1	0	0	0	0	0	0	0		0	0	0	0	0	0	1	0
H100_DRIL62.078F2_20	Plate_07	C10	H100_DRIL62.078	0	0	0	0	0		0	0	0	0	1	1	1	0	0	0	0	0	0	0		0	0	0	0	0	0	1	0
H100_DRIL62.078F2_21	Plate_07	A06	H100_DRIL62.078	0	0	0	0	0	0	0	0	0	0	1	2	1	0	0	0	0	0	0	0		0	0	0	0	0	0	1	0
H100_DRIL62.078F2_22	Plate_07	D08	H100_DRIL62.078	0	0	0	0	0		0	0	0	0	1	1	1	0	0	0	0	0	0	0		0	0	0	0	0	0	1	0
H100_DRIL62.078F2_23	Plate_07	C12	H100_DRIL62.078	0	0	0	0	0	0	0	0	0	0	1	2	1	0	0	0	0	0	0	0		0	0	0	0	0	0	2	0
H100_DRIL62.078F2_24	Plate_07	F12	H100_DRIL62.078	0	0	0	0	0	0	0	0	0	0	1	2	2	0	0	0	0	0	0	0		0	0	0	0	0	0	2	0
H100_DRIL62.078F2_25	Plate_07	E08	H100_DRIL62.078	0	0	0	0	0	0	0	0	0	0	0	0	0	0	0	0	0	0	0	0		0	0	0	0	0	0	0	0
H100_DRIL62.078F2_26	Plate_07	F07	H100_DRIL62.078	0	0	0	0	0		0	0	0	0	1	1	1	0	0	0	0	0	0	0		0	0	0	0	0	0	1	0
H100_DRIL62.078F2_27	Plate_07	D09	H100_DRIL62.078	0	0	0	0	0	0	0	0	0	0	0	0	0	0	0	0	0	0	0	0		0	0	0	0	0	0	0	0
H100_DRIL62.078F2_29	Plate_08	C01	H100_DRIL62.078	0	0	0	0	0	0	0	0	0	0	1	1	0	0	0	0	0	0	0	0		0	0	0	0	0	0	1	0
H100_DRIL62.078F2_3	Plate_07	E09	H100_DRIL62.078	0	0	0	0	0	0	0	0	0	0	2	2	1	0	0	0	0	0	0	0		0	0	0	0	0	0	2	0
H100_DRIL62.078F2_30	Plate_07	E10	H100_DRIL62.078	0	0	0	0	0		0	0	0	0	0	0	2	0	0	0	0	0	0	0		0	0	0	0	0	0	0	0
H100_DRIL62.078F2_31	Plate_07	H04	H100_DRIL62.078	0	0	0	0	0	0	0	0	0	0	1	1	0	0	0	0	0	0	0	0		0	0	0	0	0	0	1	0
H100_DRIL62.078F2_32	Plate_07	F05	H100_DRIL62.078	0	0	0	0	0	0	0	0	0	0	2	2	1	0	0	0	0	0	0	0		0	0	0	0	0	0	2	0
H100_DRIL62.078F2_33	Plate_07	A07	H100_DRIL62.078	0	0	0	0	0	0	0	0	0	0	1	1	0	0	0	0	0	0	0	0		0	0	0	0	0	0	1	0
H100_DRIL62.078F2_34	Plate_07	H09	H100_DRIL62.078	0	0	0	0	0	0	0	0	0	0	0	0	1	0	0	0	0	0	0	0		0	0	0	0	0	0	0	0
H100_DRIL62.078F2_35	Plate_07	D07	H100_DRIL62.078	0	0	0	0	0	0	0	0	0	0	1	1	1	0	0	0	0	0	0	0		0	0	0	0	0	0	1	0
H100_DRIL62.078F2_36	Plate_07	B10	H100_DRIL62.078	0	0	0	0	0	0	0	0	0	0	2	2	1	0	0	0	0	0	0	0		0	0	0	0	0	0	2	0
H100_DRIL62.078F2_37	Plate_07	A08	H100_DRIL62.078	0	0	0	0	0	0	0	0	0	0	0	0	1	0	0	0	0	0	0	0		0	0	0	0	0	0	0	0
H100_DRIL62.078F2_38	Plate_07	G04	H100_DRIL62.078	0	0	0	0	0	0	0	0	0	0	2	2	2	0	0	0	0	0	0	0		0	0	0	0	0	0	2	0
H100_DRIL62.078F2_39	Plate_07	B05	H100_DRIL62.078	0	0	0	0	0	0	0	0	0	0	1	1	2	0	0	0	0	0	0	0		0	0	0	0	0	0	1	0
H100_DRIL62.078F2_4	Plate_07	B12	H100_DRIL62.078	0	0	0	0	0	0	0	0	0	0	1	1	2	0	0	0	0	0	0	0		0	0	0	0	0	0	1	0
H100_DRIL62.078F2_40	Plate_07	A12	H100_DRIL62.078	0	0	0	0	0	0	0	0	0	0	1	0	1	0	0	0	0	0	0	0		0	0	0	0	0	0	1	0
H100_DRIL62.078F2_41	Plate_07	B09	H100_DRIL62.078	0	0	0	0	0		0	0	0	0	0	0	1	0	0	0	0	0	0	0		0	0	0	0	0	0	0	0
H100_DRIL62.078F2_42	Plate_07	E05	H100_DRIL62.078	0	0	0	0	0	0	0	0	0	0	2	1	1	0	0	0	0	0	0	0		0	0	0	0	0	0	2	0
H100_DRIL62.078F2_47	Plate_07	H11	H100_DRIL62.078	0	0	0	0	0	0	0	0	0	0	1	1	0	0	0	0	0	0	0	0		0	0	0	0	0	0	1	0
H100_DRIL62.078F2_48	Plate_07	E07	H100_DRIL62.078	0	0	0	0	0		0	0	0	0	2	1	1	0	0	0	0	0	0	0		0	0	0	0	0	0	2	0
H100_DRIL62.078F2_49	Plate_07	F09	H100_DRIL62.078	0	0	0	0	0	0	0	0	0	0	0	0	0	0	0	0	0	0	0	0		0	0	0	0	0	0	0	0
H100_DRIL62.078F2_5	Plate_07	D10	H100_DRIL62.078	0	0	0	0	0	0	0	0	0	0	2	1	1	0	0	0	0	0	0	0		0	0	0	0	0	0	2	0
H100_DRIL62.078F2_50	Plate_08	E01	H100_DRIL62.078	0	0	0	0	0		0	0	0	0	1	1	1	0	0	0	0	0	0	0		0	0	0	0	0	0	1	0
H100_DRIL62.078F2_51	Plate_07	H08	H100_DRIL62.078	0	0	0	0	0	0	0	0	0	0	0	0	1	0	0	0	0	0	0	0		0	0	0	0	0	0	0	0
H100_DRIL62.078F2_52	Plate_07	G10	H100_DRIL62.078	0	0	0	0	0	0	0	0	0	0	2	2	2	0	0	0	0	0	0	0		0	0	0	0	0	0	2	0
H100_DRIL62.078F2_53	Plate_07	H10	H100_DRIL62.078	0	0	0	0	0	0	0	0	0	0	2	1	0	0	0	0	0	0	0	0		0	0	0	0	0	0	1	0
H100_DRIL62.078F2_54	Plate_07	F08	H100_DRIL62.078	0	0	0	0	0	0	0	0	0	0	0	0	1	0	0	0	0	0	0	0		0	0	0	0	0	0	0	0
H100_DRIL62.078F2_55	Plate_07	G09	H100_DRIL62.078	0	0	0	0	0		0	0	0	0	1	1	1	0	0	0	0	0	0	0		0	0	0	0	0	0	1	0
H100_DRIL62.078F2_56	Plate_07	D11	H100_DRIL62.078	0	0	0	0	0	0	0	0	0	0	0	0	1	0	0	0	0	0	0	0		0	0	0	0	0	0	0	0
H100_DRIL62.078F2_57	Plate_07	B03	H100_DRIL62.078	0	0	0	0	0	0	0	0	0	0	2	2	1	0	0	0	0	0	0	0		0	0	0	0	0	0	2	0
H100_DRIL62.078F2_58	Plate_07	B07	H100_DRIL62.078	0	0	0	0	0	0	0	0	0	0	1	1	1	0	0	0	0	0	0	0		0	0	0	0	0	0	1	0
H100_DRIL62.078F2_59	Plate_07	D04	H100_DRIL62.078	0	0	0	0	0		0	0	0	0	1	2	1	0	0	0	0	0	0	0		0	0	0	0	0	0	1	0
H100_DRIL62.078F2_6	Plate_07	A04	H100_DRIL62.078	0	0	0	0	0		0	0	0	0	2	1	1	0	0	0	0	0	0	0		0	0	0	0	0	0	1	0
H100_DRIL62.078F2_60	Plate_07	E03	H100_DRIL62.078	0	0	0	0	0		0	0	0	0	0	0	2	0	0	0	0	0	0	0		0	0	0	0	0	0	0	0
H100_DRIL62.078F2_61	Plate_07	H03	H100_DRIL62.078	0	0	0	0	0	0	0	0	0	0	0	0	2	0	0	0	0	0	0	0		0	0	0	0	0	0	0	0
H100_DRIL62.078F2_62	Plate_07	E11	H100_DRIL62.078	0	0	0	0	0	0	0	0	0	0	0	0	0	0	0	0	0	0	0	0		0	0	0	0	0	0	0	0
H100_DRIL62.078F2_63	Plate_07	C05	H100_DRIL62.078	0	0	0	0	0	0	0	0	0	0	1	1	0	0	0	0	0	0	0	0		0	0	0	0	0	0	1	0
H100_DRIL62.078F2_64	Plate_07	F10	H100_DRIL62.078	0	0	0	0	0	0	0	0	0	0	1	1	2	0	0	0	0	0	0	0		0	0	0	0	0	0	1	0
H100_DRIL62.078F2_65	Plate_07	A03	H100_DRIL62.078	0	0	0	0	0	0	0	0	0	0	0	0	1	0	0	0	0	0	0	0		0	0	0	0	0	0	0	0
H100_DRIL62.078F2_66	Plate_07	B06	H100_DRIL62.078	0	0	0	0	0		0	0	0	0	1	1	0	0	0	0	0	0	0	0		0	0	0	0	0	0	1	0
H100_DRIL62.078F2_67	Plate_07	F03	H100_DRIL62.078	0	0	0	0	1		0	0	0	0	1	1	0	0	0	0	0	0	0	0		0	0	0	0	0	0	1	0
H100_DRIL62.078F2_68	Plate_07	C09	H100_DRIL62.078	0	0	0	0	0	0	0	0	0	0	2	2	0	0	0	0	0	0	0	0		0	0	0	0	0	0	2	0
H100_DRIL62.078F2_69	Plate_07	B11	H100_DRIL62.078	0	0	0	0	0	0	0	0	0	0	1	1	1	0	0	0	0	0	0	0		0	0	0	0	0	0	1	0
H100_DRIL62.078F2_7	Plate_07	G11	H100_DRIL62.078	0	0	0	0	0	0	0	0	0	0	0	1	1	0	0	0	0	0	0	0		0	0	0	0	0	0	0	0
H100_DRIL62.078F2_70	Plate_07	C06	H100_DRIL62.078	0	0	0	0	0	0	0	0	0	0	2	2	1	0	0	0	0	0	0	0		0	0	0	0	0	0	2	0
H100_DRIL62.078F2_71	Plate_07	A11	H100_DRIL62.078	0	0	0	0	0		0	0	0	0	1	1	2	0	0	0	0	0	0	0		0	0	0	0	0	0	1	0
H100_DRIL62.078F2_72	Plate_07	D06	H100_DRIL62.078	0	0	0	0	0	0	0	0	0	0	0	0	2	0	0	0	0	0	0	0		0	0	0	0	0	0	0	0
H100_DRIL62.078F2_73	Plate_07	A05	H100_DRIL62.078	0	0	0	0	0		0	0	0	0	0	0	2	0	0	0	0	0	0	0		0	0	0	0	0	0	0	0
H100_DRIL62.078F2_74	Plate_07	B04	H100_DRIL62.078	0	0	0	0	0		0	0	0	0	1	1	1	0	0	0	0	0	0	0		0	0	0	0	0	0	1	0
H100_DRIL62.078F2_75	Plate_07	G07	H100_DRIL62.078	0	0	0	0	0	0	0	0	0	0	1	1	1	0	0	0	0	0	0	0		0	0	0	0	0	0	1	0
H100_DRIL62.078F2_76	Plate_08	D01	H100_DRIL62.078	0	0	0	0	0	0	0	0	0	0	2	2	2	0	0	0	0	0	0	0		0	0	0	0	0	0	2	0
H100_DRIL62.078F2_77	Plate_07	H07	H100_DRIL62.078	0	0	0	0	0	0	0	0	0	0	1	1	1	0	0	0	0	0	0	0		0	0	0	0	0	0	1	0
H100_DRIL62.078F2_78	Plate_08	A01	H100_DRIL62.078	0	0	0	0	0	0	0	0	0	0	1	1	1	0	0	0	0	0	0	0		0	0	0	0	0	0	1	0
H100_DRIL62.078F2_79	Plate_07	D05	H100_DRIL62.078	0	0	0	0	0	0	0	0	0	0	0	0	1	0	0	0	0	0	0	0		0	0	0	0	0	0	0	0
H100_DRIL62.078F2_8	Plate_07	E04	H100_DRIL62.078	0	0	0	0	0		0	0	0	0	0	0	0	0	0	0	0	0	0	0		0	0	0	0	0	0	0	0
H100_DRIL62.078F2_80	Plate_07	G05	H100_DRIL62.078	0	0	0	0	1	0	0	0	0	1	0	0	1	1	0	0	0	0	0	0		0	0	0	0	0	0	0	0
H100_DRIL62.078F2_81	Plate_07	B08	H100_DRIL62.078	0	0	0	0	0	0	0	0	0	0	0	0	1	0	0	0	0	0	0	0		0	0	0	0	0	0	0	0
H100_DRIL62.078F2_82	Plate_07	H05	H100_DRIL62.078	0	0	0	0	0	0	0	0	0	0	0	0	1	0	0	0	0	0	0	0		0	0	0	0	0	0	0	0
H100_DRIL62.078F2_83	Plate_07	F04	H100_DRIL62.078	0	0	0	0	0		0	0	0	0	1	1	2	0	0	0	0	0	0	0		0	0	0	0	0	0	1	0
H100_DRIL62.078F2_84	Plate_07	C11	H100_DRIL62.078	0	0	0	0	0	0	0	0	0	0	1	1	1	0	0	0	0	0	0	0		0	0	0	0	0	0	1	0
H100_DRIL62.078F2_85	Plate_07	C08	H100_DRIL62.078	0	0	0	0	0	0	0	0	0	0	1	1	1	0	0	0	0	0	0	0		0	0	0	0	0	0	1	0
H100_DRIL62.078F2_86	Plate_07	A09	H100_DRIL62.078	1	0	0	0	0	0	0	1	1	0	1	1	1	0	1	0	1	0	0	0		0	0	0	0	0	0	1	0
H100_DRIL62.078F2_87	Plate_07	F06	H100_DRIL62.078	0	0	0	0	0		0	0	0	0	0	0	1	0	0	0	0	0	0	0		0	0	0	0	0	0	0	0
H100_DRIL62.078F2_9	Plate_07	E12	H100_DRIL62.078	0	0	0	0	0	0	0	0	0	0	1	1	1	0	0	0	0	0	0	0		0	0	0	0	0	0	1	0
H100_DRIL62.156F2_1	Plate_05	A07	H100_DRIL62.156	0	0	0	0	0	2	0	0	0	1	0	0	0	1	0	0	0	0	0	0		0	0	0	0	0	0	0	0
H100_DRIL62.156F2_10	Plate_05	E07	H100_DRIL62.156	0	0	0	0	0	2	0	0	1	1	0	0	0	1	1	0	0	0	0	0		0	0	0	0	0	0	0	0
H100_DRIL62.156F2_11	Plate_05	A09	H100_DRIL62.156	0	0	0	0	0	1	0	0	1	0	0	0	0	0	1	0	0	0	0	0		0	0	0	0	0	0	0	0
H100_DRIL62.156F2_12	Plate_06	C01	H100_DRIL62.156	0	0	0	0	0	2	0	0	1	1	0	0	0	1	1	0	0	0	0	0		0	0	0	0	0	0	0	0
H100_DRIL62.156F2_13	Plate_06	G01	H100_DRIL62.156	0	0	0	0	0	2	0	0	1	1	0	0	0	2	1	0	0	0	0	0		0	0	0	0	0	0	0	0
H100_DRIL62.156F2_14	Plate_05	B12	H100_DRIL62.156	0	0	0	0	0	2	0	0	1	1	0	0	0	2	1	0	0	0	0	0		0	0	0	0	0	0	0	0
H100_DRIL62.156F2_15	Plate_05	C07	H100_DRIL62.156	0	0	0	0	0	2	0	0	1	1	0	0	0	1	1	0	0	0	0	0		0	0	0	0	0	0	0	0
H100_DRIL62.156F2_16	Plate_05	H09	H100_DRIL62.156	0	0	0	0	1	2	0	0	1	1	0	0	0	1	1	0	0	1	0	0		0	0	0	0	0	0	0	0
H100_DRIL62.156F2_17	Plate_05	F08	H100_DRIL62.156	0	0	0	0	0	2	0	0	1	2	0	0	0	2	1	0	0	0	0	0		0	0	0	0	0	0	0	0
H100_DRIL62.156F2_18	Plate_05	E11	H100_DRIL62.156	0	0	0	0	0	2	0	0	1	2	0	0	0	2	1	0	0	0	0	0		0	0	0	0	0	0	0	0
H100_DRIL62.156F2_19	Plate_05	C12	H100_DRIL62.156	0	0	0	0	0	2	0	0	0	1	0	0	0	1	0	0	0	0	0	0		0	0	0	0	0	0	0	0
H100_DRIL62.156F2_20	Plate_05	D12	H100_DRIL62.156	0	0	0	0	0	2	0	0	1	1	0	0	0	1	1	0	0	0	0	0		0	0	0	0	0	0	0	0
H100_DRIL62.156F2_21	Plate_05	A10	H100_DRIL62.156	0	0	0	0	0	0	0	0	0	0	0	0	0	0	0	0	0	0	0	0		0	0	0	0	0	0	0	0
H100_DRIL62.156F2_22	Plate_05	F06	H100_DRIL62.156	0	0	0	0	0	2	0	0	0	1	0	0	0	1	0	0	0	0	0	0		0	0	0	0	0	0	0	0
H100_DRIL62.156F2_23	Plate_05	F10	H100_DRIL62.156	0	0	0	0	0	1	0	0	0	2	0	0	0	2	0	0	0	0	0	0		0	0	0	0	0	0	0	0
H100_DRIL62.156F2_24	Plate_05	G07	H100_DRIL62.156	0	0	0	0	0	2	0	0	1	1	0	0	0	1	1	0	0	0	0	0		0	0	0	0	0	0	0	0
H100_DRIL62.156F2_25	Plate_05	E06	H100_DRIL62.156	0	0	0	0	0	1	0	0	0	2	0	0	0	2	0	0	0	0	0	0		0	0	0	0	0	0	0	0
H100_DRIL62.156F2_26	Plate_05	C06	H100_DRIL62.156	0	0	0	0	0	2	0	0	2	2	0	0	0	2	2	0	0	0	0	0		0	0	0	0	0	0	0	0
H100_DRIL62.156F2_27	Plate_06	D01	H100_DRIL62.156	0	0	0	0	0	2	0	0	2	2	0	0	0	2	2	0	0	0	0	0		0	0	0	0	0	0	0	0
H100_DRIL62.156F2_28	Plate_05	B07	H100_DRIL62.156	0	0	0	0	0	2	0	0	0	2	0	0	0	2	0	0	0	0	0	0		0	0	0	0	0	0	0	0
H100_DRIL62.156F2_29	Plate_05	F11	H100_DRIL62.156	0	0	0	0	0	2	0	0	1	1	0	0	0	1	1	0	0	0	0	0		0	0	0	0	0	0	0	0
H100_DRIL62.156F2_3	Plate_05	C10	H100_DRIL62.156	0	0	0	0	0	2	0	0	1	0	0	0	0	2	1	0	0	0	0	0		0	0	0	0	0	0	0	0
H100_DRIL62.156F2_30	Plate_06	E01	H100_DRIL62.156	0	0	0	0	0	2	0	0	1	1	0	0	0	2	1	0	0	0	0	0		0	0	0	0	0	0	0	0
H100_DRIL62.156F2_31	Plate_05	D11	H100_DRIL62.156	0	0	0	0	0	2	0	0	2	0	0	0	0	0	2	0	0	0	0	0		0	0	0	0	0	0	0	0
H100_DRIL62.156F2_32	Plate_06	A01	H100_DRIL62.156	0	0	0	0	0	2	0	0	1	1	0	0	0	1	1	0	0	0	0	0		0	0	0	0	0	0	0	0
H100_DRIL62.156F2_33	Plate_05	D10	H100_DRIL62.156	0	0	0	0	0	2	0	0	1	2	0	0	0	2	1	0	0	0	0	0		0	0	0	0	0	0	0	0
H100_DRIL62.156F2_34	Plate_05	F07	H100_DRIL62.156	0	0	0	0	0	1	0	0	1	0	0	0	0	0	1	0	0	0	0	0		0	0	0	0	0	0	0	0
H100_DRIL62.156F2_35	Plate_05	H05	H100_DRIL62.156	0	0	0	0	0	2	0	0	2	1	0	0	0	1	2	0	0	0	0	0		0	0	0	0	0	0	0	0
H100_DRIL62.156F2_36	Plate_05	H08	H100_DRIL62.156	0	0	0	0	0	2	0	0	2	1	0	0	0	1	2	0	0	0	0	0		0	0	0	0	0	0	0	0
H100_DRIL62.156F2_37	Plate_05	H06	H100_DRIL62.156	0	0	0	0	0	2	0	0	2	1	0	0	0	1	2	0	0	0	0	0		0	0	0	0	0	0	0	0
H100_DRIL62.156F2_38	Plate_05	B11	H100_DRIL62.156	0	0	0	0	0	2	0	0	2	1	0	0	0	1	2	0	0	0	0	0		0	0	0	0	0	0	0	0
H100_DRIL62.156F2_39	Plate_05	H07	H100_DRIL62.156	0	0	0	0	0	0	0	0	2	1	0	0	0	1	2	0	0	0	0	0		0	0	0	0	0	0	0	0
H100_DRIL62.156F2_4	Plate_05	A08	H100_DRIL62.156	0	0	0	0	0	2	0	0	0	2	0	0	0	2	0	0	0	0	0	0		0	0	0	0	0	0	0	0
H100_DRIL62.156F2_40	Plate_05	E09	H100_DRIL62.156	0	0	0	0	0	2	0	0	1	1	0	0	0	1	1	0	0	0	0	0		0	0	0	0	0	0	0	0
H100_DRIL62.156F2_41	Plate_05	G10	H100_DRIL62.156	0	0	0	0	0	2	0	0	1	2	0	0	0	2	1	0	0	0	0	0		0	0	0	0	0	0	0	0
H100_DRIL62.156F2_42	Plate_05	D06	H100_DRIL62.156	0	0	0	0	0	1	0	0	2	1	0	0	0	1	2	0	0	0	0	0		0	0	0	0	0	0	0	0
H100_DRIL62.156F2_43	Plate_05	B08	H100_DRIL62.156	0	0	0	0	0	2	0	0	0	2	0	0	0	2	0	0	0	0	0	0		0	0	0	0	0	0	0	0
H100_DRIL62.156F2_44	Plate_05	E08	H100_DRIL62.156	0	0	0	0	0	2	0	0	1	1	0	0	0	1	1	0	0	0	0	0		0	0	0	0	0	0	0	0
H100_DRIL62.156F2_45	Plate_05	A06	H100_DRIL62.156	0	0	0	0	0	2	0	0	1	2	0	0	0	2	1	0	0	0	0	0		0	0	0	0	0	0	0	0
H100_DRIL62.156F2_46	Plate_05	B09	H100_DRIL62.156	0	0	0	0	0	2	0	0	1	1	0	0	0	1	1	0	0	0	0	0		0	0	0	0	0	0	0	0
H100_DRIL62.156F2_47	Plate_06	F01	H100_DRIL62.156	0	0	0	0	0	2	0	0	1	1	0	0	0	1	1	0	0	0	0	0		0	0	0	0	0	0	0	0
H100_DRIL62.156F2_48	Plate_05	G09	H100_DRIL62.156	0	0	0	0	0	2	0	0	1	1	0	0	0	1	1	0	0	0	0	0		0	0	0	0	0	0	0	0
H100_DRIL62.156F2_49	Plate_05	C08	H100_DRIL62.156	0	0	0	0	0	2	0	0	2	1	0	0	0	1	2	0	0	0	0	0		0	0	0	0	0	0	0	0
H100_DRIL62.156F2_5	Plate_05	D07	H100_DRIL62.156	0	0	0	0	0	1	0	0	1	0	0	0	0	0	1	0	0	0	0	0		0	0	0	0	0	0	0	0
H100_DRIL62.156F2_50	Plate_05	G06	H100_DRIL62.156	0	0	0	0	0	2	0	0	1	1	0	0	0	1	1	0	0	0	0	0		0	0	0	0	0	0	0	0
H100_DRIL62.156F2_51	Plate_05	C11	H100_DRIL62.156	0	0	0	0	0	0	0	0	1	1	0	0	0	1	1	0	0	0	0	0		0	0	0	0	0	0	0	0
H100_DRIL62.156F2_52	Plate_06	H01	H100_DRIL62.156	0	0	0	0	0	2	0	0	1	1	0	0	0	1	1	0	0	0	0	0		0	0	0	0	0	0	0	0
H100_DRIL62.156F2_53	Plate_05	G11	H100_DRIL62.156	0	0	0	0	0	2	0	0	0	1	0	0	0	1	0	0	0	0	0	0		0	0	0	0	0	0	0	0
H100_DRIL62.156F2_54	Plate_05	F09	H100_DRIL62.156	0	0	0	0	0	2	0	0	0	1	0	0	0	1	0	0	0	0	0	0		0	0	0	0	0	0	0	0
H100_DRIL62.156F2_55	Plate_05	E10	H100_DRIL62.156	0	0	0	0	0	2	0	0	1	1	0	0	0	1	1	0	0	0	0	0		0	0	0	0	0	0	0	0
H100_DRIL62.156F2_56	Plate_05	H10	H100_DRIL62.156	0	0	0	0	0	2	0	0	2	2	0	0	0	2	2	0	0	0	0	0		0	0	0	0	0	0	0	0
H100_DRIL62.156F2_57	Plate_05	B06	H100_DRIL62.156	0	0	0	0	0	0	0	0	1	1	0	0	0	1	1	0	0	0	0	0		0	0	0	0	0	0	0	0
H100_DRIL62.156F2_58	Plate_05	D08	H100_DRIL62.156	0	0	0	0	0	2	0	0	2	0	0	0	0	0	2	0	0	0	0	0		0	0	0	0	0	0	0	0
H100_DRIL62.156F2_59	Plate_06	B01	H100_DRIL62.156	0	0	0	0	0	2	0	0	0	1	0	0	0	1	0	0	0	0	0	0		0	0	0	0	0	0	0	0
H100_DRIL62.156F2_60	Plate_05	E12	H100_DRIL62.156	0	0	0	0	0	1	0	0	2	1	0	0	0	1	2	0	0	0	0	0		0	0	0	0	0	0	0	0
H100_DRIL62.156F2_61	Plate_05	F12	H100_DRIL62.156	0	0	0	0	0	1	0	0	0	2	0	0	0	2	0	0	0	0	0	0		0	0	0	0	0	0	0	0
H100_DRIL62.156F2_62	Plate_05	C09	H100_DRIL62.156	0	0	0	0	0	2	0	0	0	1	0	0	0	1	0	0	0	0	0	0		0	0	0	0	0	0	0	0
H100_DRIL62.156F2_63	Plate_05	B10	H100_DRIL62.156	0	0	0	0	0	2	0	0	1	2	0	0	0	2	1	0	0	0	0	0		0	0	0	0	0	0	0	0
H100_DRIL62.156F2_7	Plate_05	A12	H100_DRIL62.156	0	0	0	0	0	2	0	0	2	1	0	0	0	1	2	0	0	0	0	0		0	0	0	0	0	0	0	0
H100_DRIL62.156F2_8	Plate_05	A11	H100_DRIL62.156	0	0	0	0	0	2	0	0	0	0	0	0	0	0	0	0	0	0	0	0		0	0	0	0	0	0	0	0
H100_DRIL62.156F2_9	Plate_05	D09	H100_DRIL62.156	0	0	0	0	0	2	0	0	2	1	0	0	0	1	2	0	0	0	0	0		0	0	0	0	0	0	0	0
H100_DRIL72.040F2_1	Plate_01	C05	H100_DRIL72.040	0	0	0	0	0		0	0	0	0	0	0	0	0	0	0	0	0	0	0		0	0	0	0	0	0	0	0
H100_DRIL72.040F2_10	Plate_01	G05	H100_DRIL72.040	0	0	0	0	0		0	0	0	0	0	0	0	0	0	0	0	0	0	0		0	0	0	0	0	0	0	0
H100_DRIL72.040F2_11	Plate_01	A08	H100_DRIL72.040	0	0	0	0	0	0	0	0	0	0	0	0	0	0	0	0	0	0	0	0		0	0	0	0	0	0	0	0
H100_DRIL72.040F2_12	Plate_01	C07	H100_DRIL72.040	0	0	0	0	0	0	0	0	0	0	0	0	0	0	0	0	0	0	0	0		0	0	0	0	0	0	0	0
H100_DRIL72.040F2_13	Plate_01	F06	H100_DRIL72.040	0	0	0	0	0	0	0	0	0	0	0	0	0	0	0	0	0	0	0	0		0	0	0	0	0	0	0	0
H100_DRIL72.040F2_14	Plate_01	G04	H100_DRIL72.040	0	0	0	0	0		0	0	0	0	0	0	0	0	0	0	0	0	0	0		0	0	0	0	0	0	0	0
H100_DRIL72.040F2_15	Plate_01	H02	H100_DRIL72.040	0	0	0	0	0	0	0	0	0	0	0	0	0	0	0	0	0	0	0	0		0	0	0	0	0	0	0	0
H100_DRIL72.040F2_16	Plate_01	B08	H100_DRIL72.040	0	0	0	0	0	0	0	0	0	0	0	0	0	0	0	0	0	0	0	0		0	0	0	0	0	0	0	0
H100_DRIL72.040F2_17	Plate_01	B07	H100_DRIL72.040	0	0	0	0	0	0	0	0	0	0	0	0	0	0	0	0	0	0	0	0		0	0	0	0	0	0	0	0
H100_DRIL72.040F2_18	Plate_01	G03	H100_DRIL72.040	0	0	0	0	0	0	0	0	0	0	0	0	0	0	0	0	0	0	0	0		0	0	0	0	0	0	0	0
H100_DRIL72.040F2_19	Plate_01	B04	H100_DRIL72.040	0	0	0	0	0	0	0	0	0	0	0	0	0	0	0	0	0	0	0	0		0	0	0	0	0	0	0	0
H100_DRIL72.040F2_2	Plate_01	G01	H100_DRIL72.040	0	0	0	0	0	0	0	0	0	0	0	0	0	0	0	1	0	0	0	0		0	0	0	0	0	0	0	0
H100_DRIL72.040F2_20	Plate_01	D05	H100_DRIL72.040	0	0	0	0	0	1	0	0	0	0	0	0	0	0	0	1	0	0	0	0		0	0	0	0	0	0	0	0
H100_DRIL72.040F2_21	Plate_01	F03	H100_DRIL72.040	0	0	0	0	0		0	0	0	0	0	0	0	0	0	0	0	0	0	0		0	0	0	0	0	0	0	0
H100_DRIL72.040F2_22	Plate_01	D03	H100_DRIL72.040	0	0	0	0	0		0	0	0	0	0	0	0	0	0	0	0	0	0	0		0	0	0	0	0	0	0	0
H100_DRIL72.040F2_23	Plate_01	F05	H100_DRIL72.040	0	0	0	0	0		0	0	0	0	0	0	0	0	0	1	0	0	0	0		0	0	0	0	0	0	0	0
H100_DRIL72.040F2_24	Plate_01	D04	H100_DRIL72.040	0	0	0	0	0		0	0	0	0	0	0	0	0	0	0	0	0	0	0		0	0	0	0	0	0	0	0
H100_DRIL72.040F2_25	Plate_01	B01	H100_DRIL72.040	0	0	0	0	0	1	0	0	0	0	0	0	0	0	0	0	0	0	0	0		0	0	0	0	0	0	0	0
H100_DRIL72.040F2_26	Plate_01	E04	H100_DRIL72.040	0	0	0	0	0		0	0	0	0	0	0	0	0	0	0	0	0	0	0		0	0	0	0	0	0	0	0
H100_DRIL72.040F2_27	Plate_01	D07	H100_DRIL72.040	0	0	0	0	0		0	0	0	0	0	0	0	0	0	0	0	0	0	0		0	0	0	0	0	0	0	0
H100_DRIL72.040F2_28	Plate_01	H06	H100_DRIL72.040	0	0	0	0	0	0	0	0	0	0	0	0	0	0	0	0	0	0	0	0		0	0	0	0	0	0	0	0
H100_DRIL72.040F2_29	Plate_01	G02	H100_DRIL72.040	0	0	0	0	0		0	0	0	0	0	0	0	0	0	0	0	0	0	0		0	0	0	0	0	0	0	0
H100_DRIL72.040F2_3	Plate_01	G06	H100_DRIL72.040	0	0	0	0	0		0	0	0	0	0	0	0	0	0	0	0	0	0	0		0	0	0	0	0	0	0	0
H100_DRIL72.040F2_30	Plate_01	A06	H100_DRIL72.040	0	0	0	0	0	0	0	0	0	0	0	0	0	0	0	0	0	0	0	0		0	0	0	0	0	0	0	0
H100_DRIL72.040F2_31	Plate_01	H05	H100_DRIL72.040	0	0	0	0	0	0	0	0	0	0	0	0	0	0	0	0	0	0	0	0		0	0	0	0	0	0	0	0
H100_DRIL72.040F2_32	Plate_01	E01	H100_DRIL72.040	0	0	0	0	0		0	0	0	0	0	0	0	0	0	1	0	0	0	0		0	0	0	0	0	0	0	0
H100_DRIL72.040F2_33	Plate_01	F04	H100_DRIL72.040	0	0	0	0	0		0	0	0	0	0	0	0	0	0	0	0	0	0	0		0	0	0	0	0	0	0	0
H100_DRIL72.040F2_34	Plate_01	A03	H100_DRIL72.040	0	0	0	0	0	0	0	0	0	0	0	0	0	0	0	0	0	0	0	0		0	0	0	0	0	0	0	0
H100_DRIL72.040F2_35	Plate_01	H01	H100_DRIL72.040	0	0	0	0	0	0	0	0	0	0	0	0	0	0	0	0	0	0	0	0		0	0	0	0	0	0	0	0
H100_DRIL72.040F2_36	Plate_01	E06	H100_DRIL72.040	0	0	0	0	0		0	0	0	0	0	0	0	0	0	0	0	0	0	0		0	0	0	0	0	0	0	0
H100_DRIL72.040F2_39	Plate_01	H07	H100_DRIL72.040	0	0	0	0	0	0	0	0	0	0	0	0	0	0	0	1	0	0	0	0		0	0	0	0	0	0	0	0
H100_DRIL72.040F2_4	Plate_01	F01	H100_DRIL72.040	0	0	0	0	0		0	0	0	0	0	0	0	0	0	0	0	0	0	0		0	0	0	0	0	0	0	0
H100_DRIL72.040F2_40	Plate_01	F02	H100_DRIL72.040	0	0	0	0	0		0	0	0	0	0	0	0	0	0	0	0	0	0	0		0	0	0	0	0	0	0	0
H100_DRIL72.040F2_41	Plate_01	C04	H100_DRIL72.040	0	0	0	0	0	1	0	0	0	0	0	0	0	0	0	0	0	0	0	0		0	0	0	0	0	0	0	0
H100_DRIL72.040F2_42	Plate_01	A07	H100_DRIL72.040	0	0	0	0	0	0	0	0	0	0	0	0	0	0	0	0	0	0	0	0		0	0	0	0	0	0	0	0
H100_DRIL72.040F2_43	Plate_01	B03	H100_DRIL72.040	0	0	0	0	0		0	0	0	0	0	0	0	0	0	0	0	0	0	0		0	0	0	0	0	0	0	0
H100_DRIL72.040F2_44	Plate_01	D02	H100_DRIL72.040	0	0	0	0	0	0	0	0	0	0	0	0	0	0	0	0	0	0	0	0		0	0	0	0	0	0	0	0
H100_DRIL72.040F2_46	Plate_01	B06	H100_DRIL72.040	0	0	0	0	0	0	0	0	0	0	0	0	0	0	0	0	0	0	0	0		0	0	0	0	0	0	0	0
H100_DRIL72.040F2_47	Plate_01	A02	H100_DRIL72.040	0	0	0	0	0	0	0	0	0	0	0	0	0	0	0	0	0	0	0	0		0	0	0	0	0	0	0	0
H100_DRIL72.040F2_48	Plate_01	H08	H100_DRIL72.040	0	0	0	0	0	0	0	0	0	0	0	0	0	0	0	0	0	0	0	0		0	0	0	0	0	0	0	0
H100_DRIL72.040F2_49	Plate_01	B05	H100_DRIL72.040	0	0	0	0	0		0	0	0	0	0	0	0	0	0	0	0	0	0	0		0	0	0	0	0	0	0	0
H100_DRIL72.040F2_5	Plate_01	A05	H100_DRIL72.040	0	0	0	0	0	0	0	0	0	0	0	0	0	0	0	0	0	0	0	0		0	0	0	0	0	0	0	0
H100_DRIL72.040F2_50	Plate_01	E02	H100_DRIL72.040	0	0	0	0	0		0	0	0	0	0	0	0	0	0	0	0	0	0	0		0	0	0	0	0	0	0	0
H100_DRIL72.040F2_51	Plate_01	A04	H100_DRIL72.040	0	0	0	0	0	0	0	0	0	0	0	0	0	0	0	1	0	0	0	0		0	0	0	0	0	0	0	0
H100_DRIL72.040F2_52	Plate_01	D01	H100_DRIL72.040	0	0	0	0	0	0	0	0	0	0	0	0	0	0	0	0	0	0	0	0		0	0	0	0	0	0	0	0
H100_DRIL72.040F2_53	Plate_01	F08	H100_DRIL72.040	0	0	0	0	0	0	0	0	0	0	0	0	0	0	0	2	0	0	0	0		0	0	0	0	0	0	0	0
H100_DRIL72.040F2_54	Plate_01	G08	H100_DRIL72.040	0	0	0	0	0		0	0	0	0	0	0	0	0	0	0	0	0	0	0		0	0	0	0	0	0	0	0
H100_DRIL72.040F2_55	Plate_01	C06	H100_DRIL72.040	0	0	0	0	0		0	0	0	0	0	0	0	0	0	0	0	0	0	0		0	0	0	0	0	0	0	0
H100_DRIL72.040F2_56	Plate_01	C03	H100_DRIL72.040	0	0	0	0	0	0	0	0	0	0	0	0	0	0	0	1	0	0	0	0		0	0	0	0	0	0	0	0
H100_DRIL72.040F2_57	Plate_01	E08	H100_DRIL72.040	0	0	0	0	0	0	0	0	0	0	0	0	0	0	0	1	0	0	0	0		0	0	0	0	0	0	0	0
H100_DRIL72.040F2_58	Plate_01	A01	H100_DRIL72.040	0	0	0	0	0	0	0	0	0	0	0	0	0	0	0	0	0	0	0	0		0	0	0	0	0	0	0	0
H100_DRIL72.040F2_59	Plate_01	E03	H100_DRIL72.040	0	0	0	0	0	1	0	0	0	0	0	0	0	0	0	1	0	0	0	0		0	0	0	0	0	0	0	0
H100_DRIL72.040F2_6	Plate_01	D06	H100_DRIL72.040	0	0	0	0	0		0	0	0	0	0	0	0	0	0	0	0	0	0	0		0	0	0	0	0	0	0	0
H100_DRIL72.040F2_60	Plate_01	B02	H100_DRIL72.040	0	0	0	0	0	0	0	0	0	0	0	0	0	0	0	0	0	0	0	0		0	0	0	0	0	0	0	0
H100_DRIL72.040F2_61	Plate_01	C01	H100_DRIL72.040	0	0	0	0	0	1	0	0	0	0	0	0	0	0	0	0	0	0	0	0		0	0	0	0	0	0	0	0
H100_DRIL72.040F2_62	Plate_01	H03	H100_DRIL72.040	0	0	0	0	0	0	0	0	0	0	0	0	0	0	0	0	0	0	0	0		0	0	0	0	0	0	0	0
H100_DRIL72.040F2_63	Plate_01	C08	H100_DRIL72.040	0	0	0	0	0		0	0	0	0	0	0	0	0	0	0	0	0	0	0		0	0	0	0	0	0	0	0
H100_DRIL72.040F2_64	Plate_01	H04	H100_DRIL72.040	0	0	0	0	0	0	0	0	0	0	0	0	0	0	0	0	0	0	0	0		0	0	0	0	0	0	0	0
H100_DRIL72.040F2_7	Plate_01	E07	H100_DRIL72.040	0	0	0	0	0	0	0	0	0	0	0	0	0	0	0	0	0	0	0	0		0	0	0	0	0	0	0	0
H100_DRIL72.040F2_8	Plate_01	C02	H100_DRIL72.040	0	0	0	0	0		0	0	0	0	0	0	0	0	0	0	0	0	0	0		0	0	0	0	0	0	0	0
H100_DRIL72.040F2_9	Plate_01	E05	H100_DRIL72.040	0	0	0	0	0	0	0	0	0	0	0	0	0	0	0	0	0	0	0	0		0	0	0	0	0	0	0	0
H100_DRIL72.061F2_1	Plate_03	G03	H100_DRIL72.061	0	0	0	0	0	0	0	0	0	0	0	0	0	1	0	0	0	1	0	0		0	0	0	0	0	0	0	0
H100_DRIL72.061F2_10	Plate_02	C11	H100_DRIL72.061	0	0	0	0	0	0	0	0	0	0	0	0	0	1	0	0	1	0	1	0		0	0	0	0	0	0	0	0
H100_DRIL72.061F2_11	Plate_02	F11	H100_DRIL72.061	0	0	0	0	0	0	0	0	0	0	0	0	0	1	0	0	0	2	1	0		0	0	0	0	0	0	0	0
H100_DRIL72.061F2_12	Plate_03	E03	H100_DRIL72.061	0	0	0	0	0	0	0	0	0	0	0	0	0	0	0	0	1	0	0	0		0	0	0	0	0	0	0	0
H100_DRIL72.061F2_13	Plate_03	H01	H100_DRIL72.061	0	0	0	0	0	0	0	0	0	0	0	0	0	2	0	0	1	2	2	0		0	0	0	0	0	0	0	0
H100_DRIL72.061F2_14	Plate_02	B12	H100_DRIL72.061	0	0	0	0	0	0	0	0	0	0	0	0	0	1	0	0	1	0	1	0		0	0	0	0	0	0	0	0
H100_DRIL72.061F2_15	Plate_02	G09	H100_DRIL72.061	0	0	0	0	0	0	0	0	0	0	0	0	0	1	0	0	1	1	1	0		0	0	0	0	0	0	0	0
H100_DRIL72.061F2_16	Plate_03	C01	H100_DRIL72.061	0	0	0	0	0	0	0	0	0	0	0	0	0	1	0	0	0	2	0	0		0	0	0	0	0	0	0	0
H100_DRIL72.061F2_17	Plate_03	B04	H100_DRIL72.061	0	0	0	0	0	0	0	0	0	0	0	0	0	1	0	0	1	0	1	0		0	0	0	0	0	0	0	0
H100_DRIL72.061F2_18	Plate_02	D11	H100_DRIL72.061	0	0	0	0	0	0	0	0	0	0	0	0	0	1	0	0	1	2	1	0		0	0	0	0	0	0	0	0
H100_DRIL72.061F2_19	Plate_02	G11	H100_DRIL72.061	0	0	0	0	0	0	0	0	0	0	0	0	0	2	0	0	1	0	2	0		0	0	0	0	0	0	0	0
H100_DRIL72.061F2_2	Plate_02	C09	H100_DRIL72.061	0	0	0	0	0		0	0	0	0	0	0	0	2	0	0	2	0	2	0		0	0	0	0	0	0	0	0
H100_DRIL72.061F2_20	Plate_03	G02	H100_DRIL72.061	0	0	0	0	0	0	0	0	0	0	0	0	0	2	0	0	1	1	2	0		0	0	0	0	0	0	0	0
H100_DRIL72.061F2_21	Plate_03	B02	H100_DRIL72.061	0	0	0	0	0		0	0	0	0	0	0	0	1	0	0	0	0	0	0		0	0	0	0	0	0	0	0
H100_DRIL72.061F2_22	Plate_03	A03	H100_DRIL72.061	0	0	0	0	0		0	0	0	0	0	0	0	1	0	0	1	1	0	0		0	0	0	0	0	0	0	0
H100_DRIL72.061F2_23	Plate_02	D09	H100_DRIL72.061	0	0	0	0	0	0	0	0	0	0	0	0	0	1	0	0	0	2	1	0		0	0	0	0	0	0	0	0
H100_DRIL72.061F2_24	Plate_03	A04	H100_DRIL72.061	0	0	0	0	0	0	0	0	0	0	0	0	0	2	0	0	1	1	0	0		0	0	0	0	0	0	0	0
H100_DRIL72.061F2_25	Plate_02	E11	H100_DRIL72.061	0	0	0	0	0	0	0	0	0	0	0	0	0	2	0	0	1	0	1	0		0	0	0	0	0	0	0	0
H100_DRIL72.061F2_26	Plate_02	A12	H100_DRIL72.061	0	0	0	0	0	0	0	0	0	0	0	0	0	2	0	0	1	1	1	0		0	0	0	0	0	0	0	0
H100_DRIL72.061F2_27	Plate_02	A08	H100_DRIL72.061	0	0	0	0	0	0	0	0	0	0	0	0	0	0	0	0	1	1	0	0		0	0	0	0	0	0	0	0
H100_DRIL72.061F2_28	Plate_02	D12	H100_DRIL72.061	0	0	0	0	0	0	0	0	0	0	0	0	0	1	0	0	0	0	0	0		0	0	0	0	0	0	0	0
H100_DRIL72.061F2_29	Plate_03	D02	H100_DRIL72.061	0	0	0	0	0	0	0	0	0	0	0	0	0	1	0	0	2	2	0	0		0	0	0	0	0	0	0	0
H100_DRIL72.061F2_3	Plate_03	C05	H100_DRIL72.061	0	0	0	0	0	0	0	0	0	0	0	0	0	0	0	0	0	1	0	0		0	0	0	0	0	0	0	0
H100_DRIL72.061F2_30	Plate_03	H05	H100_DRIL72.061	0	0	0	0	0	0	0	0	0	0	0	0	0	2	0	0	1	1	2	0		0	0	0	0	0	0	0	0
H100_DRIL72.061F2_31	Plate_03	D01	H100_DRIL72.061	0	0	0	0	0	0	0	0	0	0	0	0	0	1	0	0	1	1	1	0		0	0	0	0	0	0	0	0
H100_DRIL72.061F2_32	Plate_03	E04	H100_DRIL72.061	0	0	0	0	0		0	0	0	0	0	0	0	0	0	0	1	2	0	0		0	0	0	0	0	0	0	0
H100_DRIL72.061F2_33	Plate_03	D03	H100_DRIL72.061	0	0	0	0	0	0	0	0	0	0	0	0	0	2	0	0	1	1	2	0		0	0	0	0	0	0	0	0
H100_DRIL72.061F2_34	Plate_03	B03	H100_DRIL72.061	0	0	0	0	0	0	0	0	0	0	0	0	0	0	0	0	0	1	0	0		0	0	0	0	0	0	0	0
H100_DRIL72.061F2_35	Plate_02	D10	H100_DRIL72.061	0	0	0	0	0	0	0	0	0	0	0	0	0	2	0	0	1	0	2	0		0	0	0	0	0	0	0	0
H100_DRIL72.061F2_36	Plate_02	F12	H100_DRIL72.061	0	0	0	0	0	0	0	0	0	0	0	0	0	2	0	0	1	2	2	0		0	0	0	0	0	0	0	0
H100_DRIL72.061F2_37	Plate_02	E08	H100_DRIL72.061	0	0	0	0	0	0	0	0	0	0	0	0	0	1	0	0	1	0	1	0		0	0	0	0	0	0	0	0
H100_DRIL72.061F2_38	Plate_03	F02	H100_DRIL72.061	0	0	0	0	0	0	0	0	0	0	0	0	0	2	0	0	0	1	2	0		0	0	0	0	0	0	0	0
H100_DRIL72.061F2_39	Plate_03	F05	H100_DRIL72.061	0	0	0	0	0	1	0	0	0	0	0	0	0	1	0	0	1	1	1	0		0	0	0	0	0	0	0	0
H100_DRIL72.061F2_4	Plate_03	B05	H100_DRIL72.061	0	0	0	0	0		0	0	0	0	0	0	0	1	0	0	1	1	1	0		0	0	0	0	0	0	0	0
H100_DRIL72.061F2_40	Plate_02	H09	H100_DRIL72.061	0	0	0	0	0	0	0	0	0	0	0	0	0	1	0	0	2	2	0	0		0	0	0	0	0	0	0	0
H100_DRIL72.061F2_41	Plate_03	H02	H100_DRIL72.061	0	0	0	0	0	0	0	0	0	0	0	0	0	0	0	0	1	1	0	0		0	0	0	0	0	0	0	0
H100_DRIL72.061F2_42	Plate_03	C04	H100_DRIL72.061	0	0	0	0	0	0	0	0	0	0	0	0	0	0	0	0	1	2	0	0		0	0	0	0	0	0	0	0
H100_DRIL72.061F2_43	Plate_02	C10	H100_DRIL72.061	0	0	0	0	0	0	0	0	0	0	0	0	0	1	0	0	1	1	1	0		0	0	0	0	0	0	0	0
H100_DRIL72.061F2_44	Plate_03	H04	H100_DRIL72.061	0	0	0	0	0	0	0	0	0	0	0	0	0	1	0	0	0	1	1	0		0	0	0	0	0	0	0	0
H100_DRIL72.061F2_45	Plate_03	F03	H100_DRIL72.061	0	0	0	0	0		0	0	0	0	0	0	0	1	0	0	0	0	1	0		0	0	0	0	0	0	0	0
H100_DRIL72.061F2_46	Plate_02	A09	H100_DRIL72.061	0	0	0	0	0	0	0	0	0	0	0	0	0	0	0	0	0	2	0	0		0	0	0	0	0	0	0	0
H100_DRIL72.061F2_47	Plate_03	C03	H100_DRIL72.061	0	0	0	0	0		0	0	0	0	0	0	0	0	0	0	1	1	0	0		0	0	0	0	0	0	0	0
H100_DRIL72.061F2_48	Plate_03	D05	H100_DRIL72.061	0	0	0	0	0	0	0	0	0	0	0	0	0	2	0	0	0	1	2	0		0	0	0	0	0	0	0	0
H100_DRIL72.061F2_49	Plate_02	E10	H100_DRIL72.061	0	0	0	0	0	0	0	0	0	0	0	0	0	2	0	0	1	1	2	0		0	0	0	0	0	0	0	0
H100_DRIL72.061F2_5	Plate_03	A05	H100_DRIL72.061	0	0	0	0	0	0	0	0	0	0	0	0	0	1	0	0	1	1	1	0		0	0	0	0	0	0	0	0
H100_DRIL72.061F2_50	Plate_03	A02	H100_DRIL72.061	0	0	0	0	0	0	0	0	0	0	0	0	0	0	0	0	2	1	0	0		0	0	0	0	0	0	0	0
H100_DRIL72.061F2_51	Plate_02	B11	H100_DRIL72.061	0	0	0	0	0	0	0	0	0	0	0	0	0	0	0	0	1	2	0	0		0	0	0	0	0	0	0	0
H100_DRIL72.061F2_52	Plate_03	E01	H100_DRIL72.061	0	0	0	0	0		0	0	0	0	0	0	0	1	0	0	1	0	0	0		0	0	0	0	0	0	0	0
H100_DRIL72.061F2_53	Plate_03	G04	H100_DRIL72.061	0	0	0	0	0	0	0	0	0	0	0	0	0	2	0	0	0	1	2	0		0	0	0	0	0	0	0	0
H100_DRIL72.061F2_54	Plate_03	G01	H100_DRIL72.061	0	0	0	0	0	0	0	0	0	0	0	0	0	2	0	0	0	1	2	0		0	0	0	0	0	0	0	0
H100_DRIL72.061F2_55	Plate_02	C12	H100_DRIL72.061	0	0	0	0	0	0	0	0	0	0	0	0	0	2	0	0	0	1	2	0		0	0	0	0	0	0	0	0
H100_DRIL72.061F2_56	Plate_03	F01	H100_DRIL72.061	0	0	0	0	0	0	0	0	0	0	0	0	0	1	0	0	2	2	1	0		0	0	0	0	0	0	0	0
H100_DRIL72.061F2_57	Plate_03	B01	H100_DRIL72.061	0	0	0	0	0	0	0	0	0	0	0	0	0	0	0	0	1	1	0	0		0	0	0	0	0	0	0	0
H100_DRIL72.061F2_58	Plate_03	E02	H100_DRIL72.061	0	0	0	0	0		0	0	0	0	0	0	0	0	0	0	1	0	0	0		0	0	0	0	0	0	0	0
H100_DRIL72.061F2_59	Plate_02	A10	H100_DRIL72.061	0	0	0	0	0	0	0	0	0	0	0	0	0	1	0	0	0	0	1	0		0	0	0	0	0	0	0	0
H100_DRIL72.061F2_6	Plate_03	G05	H100_DRIL72.061	0	0	0	0	0	0	0	0	0	0	0	0	0	1	0	0	1	1	1	0		0	0	0	0	0	0	0	0
H100_DRIL72.061F2_60	Plate_02	D08	H100_DRIL72.061	0	0	0	0	0		0	0	0	0	0	0	0	0	0	0	2	2	0	0		0	0	0	0	0	0	0	0
H100_DRIL72.061F2_61	Plate_02	B08	H100_DRIL72.061	0	0	0	0	0	0	0	0	0	0	0	0	0	1	0	0	0	1	0	0		0	0	0	0	0	0	0	0
H100_DRIL72.061F2_62	Plate_02	E12	H100_DRIL72.061	0	0	0	0	0	0	0	0	0	0	0	0	0	2	0	0	1	1	2	0		0	0	0	0	0	0	0	0
H100_DRIL72.061F2_63	Plate_02	E09	H100_DRIL72.061	0	0	0	0	0		0	0	0	0	0	0	0	1	0	0	1	1	1	0		0	0	0	0	0	0	0	0
H100_DRIL72.061F2_64	Plate_03	A06	H100_DRIL72.061	0	0	0	0	0	0	0	0	0	0	0	0	0	1	0	0	1	2	1	0		0	0	0	0	0	0	0	0
H100_DRIL72.061F2_65	Plate_03	B06	H100_DRIL72.061	0	0	0	0	0	0	0	0	0	0	0	0	0	0	0	0	1	1	0	0		0	0	0	0	0	0	0	0
H100_DRIL72.061F2_66	Plate_03	H03	H100_DRIL72.061	0	0	0	0	0	0	0	0	0	0	0	0	0	0	0	0	2	2	0	0		0	0	0	0	0	0	0	0
H100_DRIL72.061F2_67	Plate_02	F10	H100_DRIL72.061	0	0	0	0	0	0	0	0	0	0	0	0	0	0	0	0	1	1	0	0		0	0	0	0	0	0	0	0
H100_DRIL72.061F2_68	Plate_02	C08	H100_DRIL72.061	0	0	0	0	0	0	0	0	0	0	0	0	0	2	0	0	1	1	2	0		0	0	0	0	0	0	0	0
H100_DRIL72.061F2_69	Plate_03	A01	H100_DRIL72.061	0	0	0	0	0	0	0	0	0	0	0	0	0	1	0	0	2	2	0	0		0	0	0	0	0	0	0	0
H100_DRIL72.061F2_7	Plate_03	F04	H100_DRIL72.061	0	0	0	0	0		0	0	0	0	0	0	0	1	0	0	1	1	0	0		0	0	0	0	0	0	0	0
H100_DRIL72.061F2_70	Plate_02	G10	H100_DRIL72.061	0	0	0	0	0	0	0	0	0	0	0	0	0	2	0	0	2	1	2	0		0	0	0	0	0	0	0	0
H100_DRIL72.061F2_71	Plate_02	B10	H100_DRIL72.061	0	0	0	0	0	0	0	0	0	0	0	0	0	1	0	0	1	1	0	0		0	0	0	0	0	0	0	0
H100_DRIL72.061F2_72	Plate_03	E05	H100_DRIL72.061	0	0	0	0	0	0	0	0	0	0	0	0	0	2	0	0	0	1	2	0		0	0	0	0	0	0	0	0
H100_DRIL72.061F2_73	Plate_03	D04	H100_DRIL72.061	0	0	0	0	0	0	0	0	0	0	0	0	0	0	0	0	1	2	0	0		0	0	0	0	0	0	0	0
H100_DRIL72.061F2_74	Plate_02	F09	H100_DRIL72.061	0	0	0	0	0	0	0	0	0	0	0	0	0	1	0	0	2	1	1	0		0	0	0	0	0	0	0	0
H100_DRIL72.061F2_75	Plate_02	G08	H100_DRIL72.061	0	0	0	0	0	0	0	0	0	0	0	0	0	2	0	0	0	1	2	0		0	0	0	0	0	0	0	0
H100_DRIL72.061F2_76	Plate_03	C02	H100_DRIL72.061	0	0	0	0	0	0	0	0	0	0	0	0	0	2	0	0	1	1	2	0		0	0	0	0	0	0	0	0
H100_DRIL72.061F2_77	Plate_02	H10	H100_DRIL72.061	0	0	0	0	0	0	0	0	0	0	0	0	0	1	0	0	1	2	1	0		0	0	0	0	0	0	0	0
H100_DRIL72.061F2_78	Plate_02	B09	H100_DRIL72.061	0	0	0	0	0		0	0	0	0	0	0	0	1	0	0	2	1	1	0		0	0	0	0	0	0	0	0
H100_DRIL72.061F2_79	Plate_02	H11	H100_DRIL72.061	0	0	0	0	0	0	0	0	0	0	0	0	0	0	0	0	2	2	0	0		0	0	0	0	0	0	0	0
H100_DRIL72.061F2_8	Plate_02	A11	H100_DRIL72.061	0	0	0	0	0	0	0	0	0	0	0	0	0	1	0	0	1	1	1	0		0	0	0	0	0	0	0	0
H100_DRIL72.061F2_9	Plate_02	F08	H100_DRIL72.061	0	0	0	0	0	0	0	0	0	0	0	0	0	1	0	0	1	1	1	0		0	0	0	0	0	0	0	0
H100_DRIL72.232F2_1	Plate_03	C11	H100_DRIL72.232	0	0	0	0	0	0	0	0	0	0	0	0	0	0	0	0	0	0	0	0		0	0	0	0	0	0	0	0
H100_DRIL72.232F2_10	Plate_03	E07	H100_DRIL72.232	0	0	0	0	0		0	0	0	0	0	0	0	0	0	0	1	0	0	0		0	0	0	0	0	0	0	0
H100_DRIL72.232F2_11	Plate_03	F08	H100_DRIL72.232	0	0	0	0	0	0	0	0	1	0	0	0	0	0	0	0	0	0	0	0		0	0	0	0	0	0	0	0
H100_DRIL72.232F2_12	Plate_03	E12	H100_DRIL72.232	0	0	0	0	0	0	0	0	0	0	0	0	0	0	0	0	1	0	0	0		0	0	0	0	0	0	0	0
H100_DRIL72.232F2_13	Plate_03	G07	H100_DRIL72.232	0	0	0	0	0	0	0	0	0	0	0	0	0	0	0	0	0	0	0	0		0	0	0	0	0	0	0	0
H100_DRIL72.232F2_14	Plate_03	B07	H100_DRIL72.232	0	0	0	0	0		0	0	0	0	0	0	0	0	0	0	2	0	0	0		0	0	0	0	0	0	0	0
H100_DRIL72.232F2_15	Plate_04	B02	H100_DRIL72.232	0	0	0	0	0	0	0	0	0	0	0	0	0	0	0	0	1	0	0	0		0	0	0	0	0	0	0	0
H100_DRIL72.232F2_16	Plate_04	B01	H100_DRIL72.232	0	0	0	0	0		0	0	2	0	0	0	0	0	0	0	1	0	0	0		0	0	0	0	0	0	0	0
H100_DRIL72.232F2_17	Plate_03	F11	H100_DRIL72.232	0	0	0	0	0	0	0	0	0	0	0	0	0	0	0	0	1	0	0	0		0	0	0	0	0	0	0	0
H100_DRIL72.232F2_18	Plate_04	A01	H100_DRIL72.232	0	0	0	0	0		0	0	0	0	0	0	0	0	0	0	0	0	0	0		0	0	0	0	0	0	0	0
H100_DRIL72.232F2_19	Plate_04	H01	H100_DRIL72.232	0	0	0	0	0	0	0	0	0	0	0	0	0	0	0	0	1	0	0	0		0	0	0	0	0	0	0	0
H100_DRIL72.232F2_2	Plate_03	E11	H100_DRIL72.232	0	0	0	0	0		0	0	0	0	0	0	0	0	0	0	0	0	0	0		0	0	0	0	0	0	0	0
H100_DRIL72.232F2_20	Plate_03	C06	H100_DRIL72.232	0	0	0	0	0		0	0	2	0	0	0	0	0	0	1	0	0	0	0		0	0	0	0	0	0	0	0
H100_DRIL72.232F2_21	Plate_03	A10	H100_DRIL72.232	0	0	0	0	0	0	0	0	0	0	0	0	0	0	0	1	1	0	0	0		0	0	0	0	0	0	0	0
H100_DRIL72.232F2_22	Plate_04	G01	H100_DRIL72.232	0	0	0	0	0	0	0	0	1	0	0	0	0	0	0	0	1	0	0	0		0	0	0	0	0	0	0	0
H100_DRIL72.232F2_23	Plate_03	G11	H100_DRIL72.232	0	0	0	0	0	0	0	0	0	0	0	0	0	0	0	0	0	0	0	0		0	0	0	0	0	0	0	0
H100_DRIL72.232F2_24	Plate_03	E09	H100_DRIL72.232	0	0	0	0	0		0	0	0	0	0	0	0	0	0	0	1	0	0	0		0	0	0	0	0	0	0	0
H100_DRIL72.232F2_25	Plate_03	F09	H100_DRIL72.232	0	0	0	0	0	0	0	0	0	0	0	0	0	0	0	0	1	0	0	0		0	0	0	0	0	0	0	0
H100_DRIL72.232F2_26	Plate_04	C01	H100_DRIL72.232	0	0	0	0	0		0	0	0	0	0	0	0	0	0	0	0	0	0	0		0	0	0	0	0	0	0	0
H100_DRIL72.232F2_27	Plate_03	F07	H100_DRIL72.232	0	0	0	0	0	0	0	0	1	0	0	0	0	0	0	0	1	0	0	0		0	0	0	0	0	0	0	0
H100_DRIL72.232F2_28	Plate_03	B11	H100_DRIL72.232	0	0	0	0	0	0	0	0	0	0	0	0	0	0	0	0	1	0	0	0		0	0	0	0	0	0	0	0
H100_DRIL72.232F2_29	Plate_03	G06	H100_DRIL72.232	0	0	0	0	0	0	0	0	0	0	0	0	0	0	0	1	2	0	0	0		0	0	0	0	0	0	0	0
H100_DRIL72.232F2_3	Plate_03	E08	H100_DRIL72.232	0	0	0	0	0	0	0	0	0	0	0	0	0	0	0	0	1	0	0	0		0	0	0	0	0	0	0	0
H100_DRIL72.232F2_30	Plate_03	D11	H100_DRIL72.232	0	0	0	0	0	0	0	0	1	0	0	0	0	0	0	0	0	0	0	0		0	0	0	0	0	0	0	0
H100_DRIL72.232F2_31	Plate_03	G08	H100_DRIL72.232	0	0	0	0	0		0	0	0	0	0	0	0	0	0	0	0	0	0	0		0	0	0	0	0	0	0	0
H100_DRIL72.232F2_32	Plate_03	A07	H100_DRIL72.232	0	0	0	0	0	0	0	0	0	0	0	0	0	0	0	0	1	0	0	0		0	0	0	0	0	0	0	0
H100_DRIL72.232F2_33	Plate_04	A02	H100_DRIL72.232	0	0	0	0	0		0	0	0	0	0	0	0	0	0	0	1	0	0	0		0	0	0	0	0	0	0	0
H100_DRIL72.232F2_34	Plate_03	D07	H100_DRIL72.232	0	0	0	0	0	0	0	0	1	0	0	0	0	0	0	0	0	0	0	0		0	0	0	0	0	0	0	0
H100_DRIL72.232F2_35	Plate_04	E01	H100_DRIL72.232	0	0	0	0	0	0	0	0	0	0	0	0	0	0	0	0	1	0	0	0		0	0	0	0	0	0	0	0
H100_DRIL72.232F2_36	Plate_03	E06	H100_DRIL72.232	0	0	0	0	0	0	0	0	0	0	0	0	0	0	0	0	1	0	0	0		0	0	0	0	0	0	0	0
H100_DRIL72.232F2_37	Plate_03	D06	H100_DRIL72.232	0	0	0	0	0	0	0	0	0	0	0	0	0	0	0	0	2	0	0	0		0	0	0	0	0	0	0	0
H100_DRIL72.232F2_38	Plate_03	A11	H100_DRIL72.232	0	0	0	0	0	0	0	0	0	0	0	0	0	0	0	0	1	0	0	0		0	0	0	0	0	0	0	0
H100_DRIL72.232F2_39	Plate_03	H08	H100_DRIL72.232	0	0	0	0	0	0	0	0	1	0	0	0	0	0	0	0	1	0	0	0		0	0	0	0	0	0	0	0
H100_DRIL72.232F2_4	Plate_03	F06	H100_DRIL72.232	0	0	0	0	0		0	0	0	0	0	0	0	0	0	0	1	0	0	0		0	0	0	0	0	0	0	0
H100_DRIL72.232F2_40	Plate_04	F01	H100_DRIL72.232	0	0	0	0	0	0	0	0	0	0	0	0	0	0	0	0	2	0	0	0		0	0	0	0	0	0	0	0
H100_DRIL72.232F2_41	Plate_03	C10	H100_DRIL72.232	0	0	0	0	0		0	0	1	0	0	0	0	0	0	0	1	0	0	0		0	0	0	0	0	0	0	0
H100_DRIL72.232F2_42	Plate_03	C12	H100_DRIL72.232	0	0	0	0	0	0	0	0	0	0	0	0	0	0	0	0	1	0	0	0		0	0	0	0	0	0	0	0
H100_DRIL72.232F2_43	Plate_03	H06	H100_DRIL72.232	0	0	0	0	0	0	0	0	1	0	0	0	0	0	0	1	2	0	0	0		0	0	0	0	0	0	0	0
H100_DRIL72.232F2_44	Plate_03	D09	H100_DRIL72.232	0	0	0	0	0		0	0	0	0	0	0	0	0	0	0	1	0	0	0		0	0	0	0	0	0	0	0
H100_DRIL72.232F2_45	Plate_03	F12	H100_DRIL72.232	0	0	0	0	0	0	0	0	0	0	0	0	0	0	0	0	1	0	0	0		0	0	0	0	0	0	0	0
H100_DRIL72.232F2_46	Plate_03	G10	H100_DRIL72.232	0	0	0	0	0	0	0	0	0	0	0	0	0	0	0	0	1	0	0	0		0	0	0	0	0	0	0	0
H100_DRIL72.232F2_47	Plate_03	C08	H100_DRIL72.232	0	0	0	0	0	0	0	0	0	0	0	0	0	0	0	0	1	0	0	0		0	0	0	0	0	0	0	0
H100_DRIL72.232F2_48	Plate_03	A12	H100_DRIL72.232	0	0	0	0	0	0	0	0	0	0	0	0	0	0	0	1	0	0	0	0		0	0	0	0	0	0	0	0
H100_DRIL72.232F2_49	Plate_03	F10	H100_DRIL72.232	0	0	0	0	0	0	0	0	0	0	0	0	0	0	0	0	2	0	0	0		0	0	0	0	0	0	0	0
H100_DRIL72.232F2_5	Plate_03	A09	H100_DRIL72.232	0	0	0	0	0	0	0	0	0	0	0	0	0	0	0	1	2	0	0	0		0	0	0	0	0	0	0	0
H100_DRIL72.232F2_50	Plate_03	C09	H100_DRIL72.232	0	0	0	0	0		0	0	1	0	0	0	0	0	0	0	1	0	0	0		0	0	0	0	0	0	0	0
H100_DRIL72.232F2_51	Plate_03	H09	H100_DRIL72.232	0	0	0	0	0	0	0	0	0	0	0	0	0	0	0	1	1	0	0	0		0	0	0	0	0	0	0	0
H100_DRIL72.232F2_52	Plate_03	D12	H100_DRIL72.232	0	0	0	0	0	0	0	0	0	0	0	0	0	0	0	0	2	0	0	0		0	0	0	0	0	0	0	0
H100_DRIL72.232F2_53	Plate_03	D08	H100_DRIL72.232	0	0	0	0	0	0	0	0	0	0	0	0	0	0	0	0	1	0	0	0		0	0	0	0	0	0	0	0
H100_DRIL72.232F2_54	Plate_03	H07	H100_DRIL72.232	0	0	0	0	0	0	0	0	0	0	0	0	0	0	0	0	1	0	0	0		0	0	0	0	0	0	0	0
H100_DRIL72.232F2_55	Plate_03	H11	H100_DRIL72.232	0	0	0	0	0		0	0	1	0	0	0	0	0	0	0	2	0	0	0		0	0	0	0	0	0	0	0
H100_DRIL72.232F2_56	Plate_03	B10	H100_DRIL72.232	0	0	0	0	0	0	0	0	1	0	0	0	0	0	0	0	1	0	0	0		0	0	0	0	0	0	0	0
H100_DRIL72.232F2_57	Plate_03	D10	H100_DRIL72.232	0	0	0	0	0	0	0	0	0	0	0	0	0	0	0	1	1	0	0	0		0	0	0	0	0	0	0	0
H100_DRIL72.232F2_58	Plate_04	D01	H100_DRIL72.232	0	0	0	0	0	0	0	0	0	0	0	0	0	0	0	0	1	0	0	0		0	0	0	0	0	0	0	0
H100_DRIL72.232F2_59	Plate_03	C07	H100_DRIL72.232	0	0	0	0	0		0	0	0	0	0	0	0	0	0	0	1	0	0	0		0	0	0	0	0	0	0	0
H100_DRIL72.232F2_6	Plate_03	B08	H100_DRIL72.232	0	0	0	0	0		0	0	1	0	0	0	0	0	0	0	0	0	0	0		0	0	0	0	0	0	0	0
H100_DRIL72.232F2_60	Plate_03	G09	H100_DRIL72.232	0	0	0	0	0	0	0	0	1	0	0	0	0	0	0	0	1	0	0	0		0	0	0	0	0	0	0	0
H100_DRIL72.232F2_61	Plate_04	C02	H100_DRIL72.232	0	0	0	0	0		0	0	0	0	0	0	0	0	0	0	0	0	0	0		0	0	0	0	0	0	0	0
H100_DRIL72.232F2_62	Plate_03	E10	H100_DRIL72.232	0	0	0	0	0	0	0	0	0	0	0	0	0	0	0	0	1	0	0	0		0	0	0	0	0	0	0	0
H100_DRIL72.232F2_63	Plate_03	B09	H100_DRIL72.232	0	0	0	0	0	0	0	0	0	0	0	0	0	0	0	0	2	0	0	0		0	0	0	0	0	0	0	0
H100_DRIL72.232F2_7	Plate_03	A08	H100_DRIL72.232	0	0	0	0	0	0	0	0	1	0	0	0	0	0	0	1	1	0	0	0		0	0	0	0	0	0	0	0
H100_DRIL72.232F2_8	Plate_03	B12	H100_DRIL72.232	0	0	0	0	0	0	0	0	0	0	0	0	0	0	0	0	0	0	0	0		0	0	0	0	0	0	0	0
H100_DRIL72.232F2_9	Plate_03	H10	H100_DRIL72.232	0	0	0	0	0	0	0	0	0	0	0	0	0	0	0	0	2	0	0	0		0	0	0	0	0	0	0	0
